# Supplementary material for: Identification and classification of Aquilaria (Thymelaeaceae): inferences from a phylogenetic study based on matK sequences
Source: PeerJ. 2025 Jul 23;13:e19752. doi: 10.7717/peerj.19752 (PMC12296565; doi:10.7717/peerj.19752)
Supplement: Supplemental Information 8 [file peerj-13-19752-s008.xlsx]

## Sheet: Table S1
Table S1. Information table of plant materials used in this study
Number	ID	Full Name	Source
1	AGXHM	Guangxi medicinal materials market agarwood plant	Guangxi medicinal materials market, China
2	AFCSM	Macau university of science and technology agarwood Sample	Macau university of science and technology
3	ADTMM	Detian waterfall agarwood	Vietnam Detian medicinal materials market
4	ADXGN	Vietnam guangnan agarwood	Vietnam Guangnan medicinal materials market
5	ADXYZ	Vietnam nha trang agarwood	Vietnam Nha Trang
6	ADTYS	Detian market cut tobacco agarwood	Vietnam Detian medicinal materials market
7	AHGSM	Macau customs small agarwood	Macau customs
8	AHGPY	Macau customs leather oil agarwood	Macau customs
9	AHGBG	Macau customs agarwood strips b	Macau customs
10	AHGLG	Macau customs agarwood strips a	Macau customs
11	AHGYN	Indonesian agarwood c	Indonesia customs
12	AHGYS	Macau customs easy to disperse agarwood	Macau customs
13	AYNSJ	Indonesian ripe aroma	Indonesia customs
14	AYNRG	Indonesian artificial agarwood	Indonesia customs
15	AYNQN	Indonesian baiqinan	Indonesia customs
16	AYNZK	Vietnamese drilled agarwood	Vietnam customs
17	AYNQF	Vietnamese strong rot agarwood	Vietnam customs
18	AMLWD	Malaysian wild agarwood	Malaysia customs
19	AYNWD	Indonesian wild agarwood	Indonesia customs
20	AJPWa	Cambodia wild agarwood	Cambodia customs
21	AJPWb	Cambodia wild agarwood	Cambodia customs
22	AJPRG	Cambodian artificial agarwood	Cambodia customs
23	AJPDa	Cambodia agarwood toppled	Cambodia customs
24	AJPDb	Cambodia inverted agarwood	Cambodia customs
25	AJPMI	Cambodian microbial fragrance	Cambodia customs
26	AJPQN	Cambodia hachinan	Cambodia customs
27	AJPJF	Cambodian hair growing agarwood	Cambodia customs
28	AZSOG	Zhongshan grade 1 agarwood	Purchase from Zhongshan medicinal materials market, China
29	AYNCX	Indonesian agarwood a	Purchase from
30	AHNCX	Hainan agarwood	Hainan medicinal materials market, China
31	ADHSP	Dinghu mountain agarwood skin	Guangdong Zhaoqing medicinal materials market, China
32	ADHSX	Dinghu mountain agarwood	Guangdong Zhaoqing medicinal materials market, China
33	AKZBB	Indonesian agarwood b	Indonesia customs
34	ADXBJ	Dongxing agarwood ornaments	Vietnam customs

## Sheet: Table S2
Table S2. MatK sequence accession number and DNA information in time clock analysis
>MF443398.1 Aquilaria agallochum H01
TTTTATTCGATACAAACCCTTTTTTTTTGAGGATCCGCTGTGATAATGAGAAAAATTTCT
GCATATACGCAAAAATCGGTCGATAATATCAGAATCTGATGAATCGACCCAAGTTGGCTT
ACTAATAGGATGACACGATGCGTTACAAAAATTCGCTTTAGACAATGATCCAATCAGAGA
AATCATTGGCATTTTTGTATCTAGCTTTTTAATAGTATTATCTATTAGAAAGAAGTTTTC
TAGCATTTGACTGCGTACCACTGAAGGATTTAATCGCACATTTGAAAGATAGCCTAGAAA
GTCAAGAGAATATTTGCATAATTGGTTTATACGGACCCCTCCTGATTGAGACCACACATA
AAAATGATATTGCCATAAATTGATAAAGTAATATTTCCACTTATTCATCATAAGAGGCGT
ATCGTTTGAAGCAAGAATAGATTTTCCTTGATATCTAACAAAATGTATGAAGGGATCCTT
GAACAAGGATAGGTTGTTCTGAAAATCATTAGAAAAAACTTCTACAAGATGTTCGATTTT
TCCATAGAAATAGATCCGTTCAAGAAAGATTGCAGAAGATGTTGATCGTAAATGATAGGA
TTGGTTACGGAGAAAAAGGAAAATTAATTCGCACTCACATATATGAGAATTATATAGGAA
AAAAAAGAATCTTGGATTCAAATTCAAAATAGAAATGGATTTCTTTGAAGTAATAAGACT
CTTCAAATTCAAATACTCGTAGAAAAAAAACC
>MF443399.1 Aquilaria beccariana H01
TTTTATTCGATACAAACCCTTTTTTTTTGAGGATCCGCTGTGATAATGAGAAAAATTTCT
GCATATACGCAAAAATCGGTCGATAATATCAGAATCTGATGAATCGACCCAAGTTGGCTT
ACTAATAGGATGACACGATGCGTTACAAAAATTCGCTTTAGACAATGATCCAATCAGAGA
AATCATTGGAATTTTTGTATCTAGCTTTTTAATAGTATTATCTATTAGAAAGAAGTTTTC
TAGCATTTGACTGCGTACCACTGAAGGATTTAATCGCACATTTGAAAGATAGCCTAGAAA
GTCAAGAGAATATTTGCATAATTGGTTTATACGGACCCCTCCTGATTGAGACCACACATA
AAAATGATATTGCCATAAATTGATAAAGTAATATTTCCACTTATTCATCAGAAGAGGCGT
ATCATTTGAAGCAAGAATAGATTTTCCTTGATATCTAACAAAATGTATGAAGGGATCCTT
GAACAAGCATAGGTTGTTCTGAAAATCATTAGAAAAGACTTCTACAAGATGTTCGATTTT
TCCATAGAAATAGATCCGTTCAAGAAAGATTGCAGAAGATGTTGATCGTAAATGATAGGA
TTGGTTACGGAGAAAAAGGAAAATGAATTCGCACTCACATATATGAGAATTATATAGGAA
AAAAAAGAATCTTGGATTCAAATTCAAAATAGAAATGGATTTCTTTGAAGTAATAAGACT
CTTCAAATTCAAATACTCGTAGAAAAAAAACC
>KX424697.1 Aquilaria beccariana H02
TTTTATTCGATACAAACCCTTTTTTTTTGAGGATCCGCTGTGATAATGAGAAAAATTTCT
GCATATACGCAAAAATCGGTCGATAATATCAGAATCTGATGAATCGACCCAAGTTGGCTT
ACTAATAGGATGACACGATGCGTTACAAAAATTCGCTTTAGACAATGATCCAATCAGAGA
AATCATTGGAATTTTTGTATCTAGCTTTTTAATAGTATTATCTATTAGAAAGAAGTTTTC
TAGCATTTGACTGCGTACCACTGAAGGATTTAATCGCACATTTGAAAGATAGCCTAGAAA
GTCAAGAGAATATTTGCATAATTGGTTTATACGGACCCCTCCTGATTGAGACCACACATA
AAAATGATATTGCCATAAATTGATAAAGTAATATTTCCACTTATTCATCAGAAGAGGCGT
ATCATTTGAAGCAAGAATAGATTTTCCTTGATATCTAACAAAATGTATGAAGGGATCCTT
GAACAAGCATAGGTTGTTYTGAAAATCATTAGAAAAGACTTYTACAAGATGTTCGATTTT
TCCATAGAAATAGATCCGTTCAAGAAAGATTGCAGAAGATGTTGATCGTAAATGATAGGA
TTGGTTACGGAGAAAAAGGAAAATGAATTCGCACTCACATATATGAGAATTATATAGGAA
AAAAAAGAATCTTGGATTCAAATTCAAAATAGAAATGGATTTCTTTGAAGTAATAAGACT
CTTCAAATTCAAATACTCGTAGAAAAAAAACC
>KY927337.1 Aquilaria crassna H01
TTTTATTCGATACAAACCCTTTTTTTTTGAGGATCCGCTGTGATAATGAGAAAAATTTCT
GCATATACGCAAAAATCGGTCGATAATATCAGAATCTGATGAATCGACCCAAGTTGGCTT
ACTAATAGGATGACACGATGCGTTACAAAAATTCGCTTTAGACAATGATCCAATCAGAGA
AATCATTGGAATTTTTGTATCTAGCTTTTTAATAGTATTATCTATTAGAAAGAAGTTTTC
TAGCATTTGACTGCGTACCACTGAAGGATTTAATCGCACATTTGAAAGATAGCCTAGAAA
GTCAAGAGAATATTTGCATAATTGGTTTATACGGACCCCTCCTGATTGAGACCACACATA
AAAATGATATTGCCATAAATTGATAAAGTAATATTTCCACTTATTCATCAGAAGAGGCGT
ATCGTTTGAAGCAAGAATAGATTTTCCTTGATATCTAACAAAATGTATGAAGGGATCCTT
GAACAAGCATAGGTTGTTCTGAAAATCATTAGAAAAGACTTCTACAAGATGTTCGATTTT
TCCATAGAAATAGATCCGTTCAAGAAAGATTGCAGAAGATGTTGATCGTAAATGATAGGA
TTGGTTACGGAGAAAAAGGAAAATGAATTCGCACTCACATATATGAGAATTATATAGGAA
AAAAAAGAATCTTGGATTCAAATTCAAAATAGAAATGGATTTCTTTGAAGTAATAAGACT
CTTCAAATTCAAATACTCGTAGAAAAAAAACC
>MF443400.1 Aquilaria cumingiana H01
TTTTATTCGATACAAACCCTTTTTTTTTGAGGATCCGCTGTGATAATGAGAAAAATTTCT
GCATATACGCAAAAATCGGTCGATAATATCAGAATCTGATGAATCGACCCAAGTTGGCTT
ACTAATAGGATGACACGATGCGTTACAAAAATTCGCTTTAGACAATGATCCAATCAGAGA
AATCATTGGAATTTTTGTATCTAGCTTTTTAATAGTATTATCTATTAGAAAGAAGTTTTC
TAGCATTTGACTGCGTACCACTGAAGGATTTAATCGCACATTTGAAAGATAGCCTAGAAA
GTCAAGAGAATATTTGCATAATTGGTTTATACGGACCCCTCCTGATTGAGACCACACATA
AAAATGATATTGCCATAAATTGATAAAGTAATATTTCCACTTATTCATCAGAAGAGGCGT
ATCGTTTGAAGCAAGAATAGATTTTCCTTGATATCTAACAAAATGTATGAAGGGATCCTT
GAACAAGCATAGGTTCTTCTGAAAATCATTAGAAAAGACTTCTACAAGATGTTCGATTTT
TCCATAGAAATAGATCCGTTCAAGAAAGATTGCAGAAGATGTTGATCGTAAATGATAGGA
TTGGTTACGGAGAAAAAGGAAAATGAATTCGCACTCACATATATGAGAATTATATAGGAA
AAAAAAGAATCTTGGATTCAAATTCAAAATAGAAATGGATTTCTTTGAAGTAATAAGACT
CTTCAAATTCAAATACTCGTAGAAAAAAAACC
>KY927321.1 Aquilaria hirta H01
TTTTATTCGATACAAACCCTTTTTTTTTGAGGATCCGCTGTGATAATGAGAAAAATTTCT
GCATATACGCAAAAATCGGTCGATAATATCAGAATCTGATGAATCGACCCAAGTTGGCTT
ACTAATAGGATGACACGATGCGGTACAAAAATTCGCTTTAGACAATGATCCAATCAGAGA
AATCATTGGAATTTTTGTATCTAGCTTTTTAATAGTATTATCTATTAGAAAGAAGTTTTC
TAGCATTTGACTGCGTACCACTGAAGGATTTAATCGCACATTTGAAAGATAGCCTAGAAA
GTCAAGAGAATATTTGCATAATTGGTTTATACGGACCCCTCCTGATTGAGACCACACATA
AAAATGATATTGCCATAAATTGATAAAGTAATATTTCCACTTATTCATCAGAAGAGGCGT
ATCGTTTGAAGCAAGAATAGATTTTCCTTGATATCTAACAAAATGTATGAAGGGATCCTT
GAACAAGCATAGGTTGTTCTGAAAATCATTAGAAAAGACTTCTACAAGATGTTCGATTTT
TCCATAGAAATAGATCCGTTCAAGAAAGATTGCAGAAGATATTGATCGTAAATGATAGGA
TTGGTTACGGAGAAAAAGGAAAATGAATTCGCACTCACATATATGAGAATTATATAGGAA
AAAAAAGAATCTTGGATTCAAATTCAAAATAGAAATGGATTTCTTTGAAGTAATAAGACT
CTTCAAATTCAAATACTCGTAGAAAAAAAACC
>KY927320.1 Aquilaria malaccensis H01
TTTTATTCGATACAAACCCTTTTTTTTTGAGGATCCGCTGTGATAATGAGAAAAATTTCT
GCATATACGCAAAAATCGGTCGATAATATCAGAATCTGATGAATCGACCCAAGTTGGCTT
ACTAATAGGATGACACGATGCGTTACAAAAATTCGCTTTAGACAATGATCCAATCAGAGA
AATCATTGGAATTTTTGTATCTAGCTTTTTAATAGTATTATCTATTAGAAAGAAGTTTTC
TAGCATTTGACTGCGTACCACTGAAGGATTTAATCGCACATTTGAAAGATAGCCTAGAAA
GTCAAGAGAATATTTGCATAATTGGTTTATACGGACCCCTCCTGATTGAGACCACACATA
AAAATGATATTGCCATAAATTGATAAAGTAATATTTCCACTTATTCATCAGAAGAGGCGT
ATCATTTGAAGCAAGAATAGATTTTCCTTGATATCTAACAAAATGTATGAAGGGATCCTT
GAACAAGCATAGGTTGTTCTGAAAATCATTAGAAAAGACTTCTACAAGATGTTCGATTTT
TCCATAGAAATAGATCCGTTCAAGAAAGATTGCAGAAGATGTTGATCGTAAATGATAGGA
TTGGTTACGGAGAAAAAGGAAAATGAATTCGCACTCACATATATGAGAATTATATAGGAA
AAAAAAGAATCTTGGATTCAAATTCAAAATAGAAATGGATTTCTTTGAAGTAATAAGACT
CTTCAAATTCAAATACTCGTAGAAAAAAAACC
>KU244198.1 Aquilaria microcarpa H01
TTTTATTCGATACAAACCCTTTTTTTTTGAGGATCCGCTGTGATAATGAGAAAAATTTCT
GCATATACGCAAAAATCGGTCGATAATATCAGAATCTGATGAATCGACCCAAGTTGGCTT
ACTAATAGGATGACACGATGCGTTACAAAAATTCGCTTTAGACAATGATCCAATCAGAGA
AATCATTGGAATTTTTGTATCTAGCTTTTTAATAGTATTATCTATTAGAAAGAAGTTTTC
TAGCATTTGACTGCGTACCACTGAAGGATTTAATCGCACATTTGAAAGATAGCCTAGAAA
GTCAAGAGAATATTTGCATAATTGGTTTATACGGACCCCTCCTGATTGAGACCACACATA
AAAATGATATTGCCATAAATTGATAAAGTAATATTTCCACTTATTCATCAGAAGAGGCGT
ATCATTTGAAGCAAGAATAGATTTTCCTTGATATCTAACAAAATGTATGAAGGGATCCTT
GAACAAGCATAGGTTGTTCTGAAAATCATTAGAAAAGACTTCTACAAGATGTTCGATTTT
TCCATAGAAATAGATCCGTTCAAGAAAGATTGCAGAAGATGTTGATCGTAAATGATAGGA
TTGGTTACGGAGAAAAAGGAAAATGAATTCGCACTCACATATATGAGAATTATATAGGAA
AAAAAAGAATCTTGGATTCAAATTCAAAATAGAAATGGATTTCTTTGAAGTAATAAGACT
CTTCAAATTCAAATACTCGTAGAAAAAAAACC
>MF443402.1 Aquilaria rugosa H01
TTTTATTCGATACAAACCCTTTTTTTTTGAGGATCCGCTGTGATAATGAGAAAAATTTCT
GCATATACGCAAAAATCGGTCGATAATATCAGAATCTGATGAATCGACCCAAGTTGGCTT
ACTAATAGGATGACACGATGCGTTACAAAAATTCGCTTTAGACAATGATCCAATCAGAGA
AATCATTGGCATTTTTGTATCTAGCTTTTTAATAGTATTATCTATTAGAAAGAAGTTTTC
TAGCATTTGACTGCGTACCACTGAAGGATTTAATCGCACATTTGAAAGATAGCCTAGAAA
GTCAAGAGAATATTTGCATAATTGGTTTATACGGACCCCTCCTGATTGAGACCACACATA
AAAATGATATTGCCATAAATTGATAAAGTAATATTTCCACTTATTCATCATAAGAGGCGT
ATCGTTTGAAGCAAGAATAGATTTTCCTTGATATCTAACAAAATGTATGAAGGGATCCTT
GAACAAGGATAGGTTGTTCTGAAAATCATTAGAAAAAACTTCTACAAGATGTTCGATTTT
TCCATAGAAATAGATCCGTTCAAGAAAGATTGCAGAAGATGTTGATCGTAAATGATAGGA
TTGGTTACGGAGAAAAAGGAAAATGAATTCGCACTCACATATATGAGAATTATATAGGAA
AAAAAAGAATCTTGGATTCAAATTCAAAATAGAAATGGATTTCTTTGAAGTAATAAGACT
CTTCAAATTCAAATACTCGTAGAAAAAAAACC
>KY927332.1 Aquilaria sinensis H01
TTTTATTCGATACAAACCCTTTTTTTTTGAGGATCCGCTGTGATAATGAGAAAAATTTCT
GCATATACGCAAAAATCGGTCGATAATATCAGAATCTGATGAATCGACCCAAGTTGGCTT
ACTAATAGGATGACACGATGCGTTACAAAAATTCGCTTTAGACAATGATCCAATCAGAGA
AATCATTGGCATTTTTGTATCTAGCTTTTTAATAGTATTATCTATTAGAAAGAAGTTTTC
TAGCATTTGACTGCGTACCACTGAAGGATTTAATCGCACATTTGAAAGATAGCCTAGAAA
GTCAAGAGAATATTTGCATAATTGGTTTATACGGACCCCTCCTGATTGAGACCACACATA
AAAATGATATTGCCATAAATTGATAAAGTAATATTTCCACTTATTCATCATAAGAGGCGT
ATCGTTTGAAGCAAGAATAGATTTTCCTTGATATCTAACAAAATGTATGAAGGGATCCTT
GAACAAGGATAGGTTGTTCTGAAAATCATTAGAAAAAACTTCTACAAGATGTTCGATTTT
TCCATAGAAATAGATCCGTTCAAGAAAGATTGCAGAAGATGTTGATCGTAAATGATAGGA
TTGGTTACGGAGAAAAAGGAAAATGAATTCGCACTCACATATATGAGAATTATATAGGAA
AAAAAAGAATCTTGGATTCAAATTCAAAATAGAAATGGATTTCTTTGAAGTAATAAGACT
CTTCAAATTCAAATACTCGTAGAAAAAAAACC
>KY927330.1 Aquilaria sinensis H02
TTTTATTCGATACAAACCCTTTTTTTTTGAGGATCCGCTGTGATAATGAGAAAAATTTCT
GCATATACGCAAAAATCGGTCGATAATATCAGAATCTGATGAATCGACCCAAGTTGGCTT
ACTAATAGGATGACACGATGCGTTACAAAAATTCGCTTTAGACAATGATCCAATCAGAGA
AATCATTGGCATTTTTGTATCTAGCTTTTTAATAGTATTATCTATTAGAAAGAAGTTTTC
TAGCATTTGACTGCGTACCACTGAAGGATTTAATCGCACATTTGAAAGATAGCCTAGAAA
GTCAAGAGAATATTTGCATAATTGGTTTATACGGACCCCTCCTGATTGAGACCACACATA
AAAATGATATTGCCAGAAATTGATAAAGTAATATTTCCACTTATTCATCATAAGAGGCGT
ATCGTTTGAAGCAAGAATAGATTTTCCTTGATATCTAACAAAATGTATGAAGGGATCCTT
GAACAAGGATAGGTTGTTCTGAAAATCATTAGAAAAAACTTGTACAAGATGTTCGATTTT
TCCATAGAAATAGATCCGTTCAAGAAAGATTGCAGAAGATGTTGATCGTAAATGATAGGA
TTGGTTACGGAGAAAAAGGAAAATTAATTCGCACTCACATATATGAGAATTATATAGGAA
AAAAAAGAATCTTGGATTCAAATTCAAAATAGAAATGGATTTCTTTGAAGTAATAAGACT
CTTCAAATTCAAATACTCGTAGAAAAAAAACC
>KT148967.1 Aquilaria sinensis H03
TTTTATTCGATACAAACCCTTTTTTTTTGAGGATCCGCTGTGATAATGAGAAAAATTTCT
GCATATACGCAAAAATCGGTCGATAATATCAGAATCTGATGAATCGACCCAAGTTGGCTT
ACTAATAGGATGACACGATGCGTTACAAAAATTCGCTTTAGACAATGATCCAATCAGAGA
AATCATTGGCATTTTTGTATCTAGCTTTTTAATAGTATTATCTATTAGAAAGAAGTTTTC
TAGCATTTGACTGCGTACCACTGAAGGATTTAATCGCACATTTGAAAGATAGCCTAGAAA
GTCAAGAGAATATTTGCATAATTGGTTTATACGGACCCCTCCTGATTGAGACCACACATA
AAAATGATATTGCCATAAATTGATAAAGTAATATTTCCACTTATTCATCATAAGAGGCGT
ATCGTTTGAAGCAAGAATAGATTTTCCTTGATATCTAACAAAATGTATGAAGGGATCCTT
GAACAAGGATAGGTTGTTCTGAAAATCATTAGAAAAAACTTCTACAAGATGTTCGATTTT
TCCATAGAAATAGATCCGTTCAAGAAAGATTGCAGAAGATGTTGATCGTAAATGATAGGA
TTGGTTACGGAGAAAAAGGAAAATTAATTCGCACTCACATATATGAGAATTATATAGGAA
AAAAAAGAATCTTGGATTCAAATTCAAAATAGAAATGGATTTCTTTGAAGTAATAAGACT
CTTCAAATTCAAATACTCGTAGAAAAAAAACC
>KY927340.1 Aquilaria yunnanensis H01
TTTTATTCGATACAAACCCTTTTTTTTTGAGGATCCGCTGTGATAATGAGAAAAATTTCT
GCATATACGCAAAAATCGGTCGATAATATCAGAATCTGATGAATCGACCCAAGTTGGCTT
ACTAATAGGATGACACGATGCGTTACAAAAATTCGCTTTAGACAATGATCCAATCAGAGA
AATCATTGGCATTTTTGTATCTAGCTTTTTAATAGTATTATCTATTAGAAAGAAGTTTTC
TAGCATTTGACTGCGTACCACTGAAGGATTTAATCGCACATTTGAAAGATAGCCTAGAAA
GTCAAGAGAATATTTGCATAATTGGTTTATACGGACCCCTCCTGATTGAGACCACACATA
AAAATGATATTGCCATAAATTGATAAAGTAATATTTCCACTTATTCATCATAAGAGGCGT
GTCGTTTGAAGCAAGAATAGATTTTCCTTGATATCTAACAAAATGTATGAAGGGATCCTT
GAACAAGGATAGGTTGTTCTGAAAATCATTAGAAAAAACTTCTACAAGATGTTCGATTTT
TCCATAGAAATAGATCCGTTCAAGAAAGATTGCAGAAGATGTTGATCGTAAATGATAGGA
TTGGTTACGGAGAAAAAGGAAAATGAATTCGCACTCACATATATGAGAATTATATAGGAA
AAAAAAGAATCTTGGATTCAAATTCAAAATAGAAATGGATTTCTTTGAAGTAATAAGACT
CTTCAAATTCAAATACTCGTAGAAAAAAAACC
>MH134155.1 Phaleria macrocarpa
TTTTACTCGATACAAACTCTTTTTTTTTGAGGATCCACTGTAATAATGAGAAATATTTCT
GCATATACGCACAAATCGATCGATAATATCAGAATCTGGCGAATCGACCCAGGGTGGCTT
ACTAATGGGATGACCCGCTGCGTTACAAAAATTCGCTTTCGACAATGATCCAATCAGAGA
AATAATTGGAATTTTTGTATCCAACTTCTTGATAGTATTATCTATTATAAATAAGTTTTC
TAGCAATTGACTCCGTATCACTGAAGGATTGAATTTCACATTTGAAAGATAGCCTAGCAA
GTCAAGAGAATATTTGCATAATTGGTTTATACGGACCCTTCCTGATTGAGACCACACGTA
AAAATGATATTGCCATAAATTGAGAAAGTAATATTTCCACTTATTCATCAGAAGAGGCGT
ATCTTTTGAAGCGAGAATAGATTTTCCTTGATATCTAACAAAATGTATGAAGGGATCCTT
GAACAAGCATAGGTTGTTCTGAAAATCATTAGAAAAGACTTCTACAAGATGTTCGATTTT
TCCATAGAAATAGATTCGTTCAAGAAAGATTACATAAGATGTTGATCGTAAATGATACGA
TTGGTTACGGAGAAAAAGGAAAATAAATTCGCATTCACATATATGAGAATTATATAGGAA
GAAGAATAATCTTGGATTAA------AAATGGAAATGGATTTCTTTGAAGTAATAAGACT
CTTCAAATTAAAATACTCATAGAAAAAAAACC
>AB924983.1 Wikstroemia polyantha
TTTTACTCGATACAAACTCTTCTTTTTTGAGGATCCACTGTAATGATGAGAAAAATTTCT
GCATATATGCACAAATCGGTCGATAATATCCGAATCTGGCAAATCAACCCAGGTTGGCTT
ACTAATGGGATGCCCCAATGCGTTACAAAAATTTGCTTTCGACAATGCTCCAATCATAGA
AATAATTGGAATTTTTGTATCCAACTTCTTTATAGTATTATCTATTAGAAATAAATTTTC
TAGCATTTGACTCCGTACCACGGAAGGATTTAATTGCACATTTGAAAGATAGCCTAGAAA
GTCAAGAGAATATTTGCATAATTGCTTTATACGGACCCTTCCTGATTGAGACCATACGTA
AAAATGATATTGCCATAAATTTATAAAGTAATATTTCCACTTATTCATCAGAAGAGACGT
ATCTTTTGAAGCGAGAATCCATTTTCCTTGATATCTAACAAAATGTATGAAGGGATCCTT
GAACAAGCATAGGTTGTTCTGAAAATCATTCGAAGAGACTTCTACAAGATGTTTGATTTT
TTCATAGAAATAGATTCGTTCAAGAAAGATTGCATAAGATATTGATCGTAAATGATAGGA
CTGATTACGGAGAAAAAGGAAAATAAATTCGCATTCACATATATGAGAATTATATAGGAA
GAAGAAGAATCTTGGATTAA------AAATAGAAATGGATTTCTGTGAAGTACTAAGACT
CTTCAAATTAAAATACTCGTAGAAAAAAAACC
>MF443404.1 Gyrinops walla
TTTTATTCGATACAAACCCTTTTTTTTTGAGGATCCGCTGTGATAATGAGAAAAATTTCT
GCATATACGCAAAAATCGGTCGATAATATCAGAATCTGATGAATCGACCCAAGTTGGCTT
ACTAATAGGATGACACGATGCGTTACAAAAATTCGCTTTAGACAATAATCCAATCAGAGA
AATCATTGGAATTTTTGTATCTAGCTTTTTAATAGTATTATCTATTAGAAAGAAGTTTTC
TAGCATTTGACTGCGTACCACTGAAGGATTTAATCGCACATTTGAAAGATAGCCTAGAAA
GTCAAGAGAATATTTGCATAATTGGTTTATACGGACCCCTCCTGATTGAGACCACACATA
AAAATGATATTGCCATAAATTGATAAAGTAATATTTCCACTTATTCATCAGAAGAGGCGT
ATCATTTGAAGCAAGAATAGATTTTCCTTGATATCTAACAAAATGTATGAAGGGATCCTT
GAACAAGCATAGGTTGTTCTGAAAATCATTAGAAAAGACTTCTACAAGATGTTCGATTTT
TCCATAGAAATAGATTCGTTCAAGAAAGATTGCAGAAGATGTTGATCGTAAATGATAGGA
TTGGTTACGGAGAAAAAGGAAAATGAATTCGCACTCACATATATGAGAATTATATAGGAA
AAAAAAGAATCTTGGATTCAAATTCAAAATAGAAATGGATTTCTTTGAAGTAATAAGACT
CTTCAAATTCAAATATTCGTAGAAAAAAAACC
>MH332506.1 Gonystylus macrophyllus
TTTTATTCGATACAAACTCTTTTTTTTTGAGGATCCACTGTGATAATGAGAAAGATTCCT
GCATATACGCACAAATCGGTCGATAATATCAGAATATGATGAATCGGCCCAGGTTGGCTT
ACTAATGGGATGCCCCGATGCGTTACAAAAATTCGCTTTAGACAATGATCCAATCAGAGA
AATAATTGGAATTTTTGTATCCAGCTTCTTCCTAGTATTATCTATTAGAAATAAGTTTTC
TAGCATTTGACTCCGTACCACTGAAGAATTTAATCGCACACTTGAAAGATAGCCTAGAAA
GTCAAGAGAATATTTGCATAATTGGTTTATACGGACCCTTCCTGATTGAGACCACACGTA
AAAATGATATTGCCATAAATTGATAAAGTAATATTTCCACTTATTCATTAGAAGAGGCGT
ATCTTTTGAAGCGAGAATAGATTTTCCTTGATATCTAACAAAATGTATGAAGGGATCCTT
GAACAACCATAGGTTGTCCTGAAAATCATTAGAAAAGACTTCTACAAGATGTTCGATTTT
TCCATAGAAATAGATTCGTTCAAGAAAGACTCCAGAAAATGTTGATCGTAAATGATAGTA
TTGGTTACGGAGAAAAAGGAAAATGAATTCGCATTCACATATATGAGAATTATATAGGAA
CAAGAAGAATTTTGGATTCA------AAATAGAAATGGATTTCTTTGGAGTAATAAGACT
CTTCAAATTACAATACTCGTAGAAAAAAAACC
>MH134156.1 Wikstroemia ridleyi
TTTTACTCGATACAAACTCTTCTTTTTTGAGGATCCACTGTAATGATGAGAAAAATTTCT
GCATATATGCACAAATCGGTCGATAATATCCGAATCTGGCAAATCAACCCAGGTTGGCTT
ACTAATGGGATGCCCCAATGCGTTACAAAAATTTGCTTTCGACAATGCTCCAATCATAGA
AATAATTGGAATTTTTGTATCCAACTTCTTTATAGTATTATCTATTAGAAATAAATTTTC
TAGCATTTGACTCCGTACCACGGAAGGATTTAATTGCACATTTGAAAGATAGCCTAGAAA
GTCAAGAGAATATTTGCATAATTGCTTTATACGGACCCTTCCTGATTGAGACCATACGTA
AAAATGATATTGCCATAAATTTATAAAGTAATATTTCCACTTATTCATCAGAAGAGACGT
ATCTTTTGAAGCGAGAATCCATTTTCCTTGATATCTAACAAAATGTATGAAGGGATCCTT
GAACAAGCATAGGTTGTTCTGAAAATCATTCGAAGAGACTTCTACAAGATGTTTGATTTT
TTCATAGAAATAGATTCGTTCAAGAAAGATTGCATAAGATATTGATCGTAAATGATAGGA
CTGATTACGGAGAAAAAGGAAAATAAATTCGCATTCACATATATGAGAATTATATAGGAA
GAAGAAGAATCTTGGATTAA------AAATAGAAATGGATTTCTGTGAAGTACTAAGACT
CTTCAAATTAAAATACTCGTAGAAAAAAAACC

## Sheet: Table S3
Table S3. ITS sequence accession number and DNA information used in this study
>MH134137.1 Aquilaria agallochum
ATGCGATACTTGGTGTGAATTGCAGAATCCCGTGAACCATCGAGTCTTTGAACGCAAGTT
GCGCCCCAAGCCTTTGGGCCGAGGGCACGTCTGCCTGGGTGTCACGCATTGTAGCCCCCC
ACCCTCGTGGTAATGTCTGTGAGGGCTGTGTGCGGCTGATACTGGCCTTCCCGTATGCAC
AGCAATGCGGTTGGCCCAAATGGAGGAACCCAGGGCGGTGTATGCCATGATGAGCGGTGG
TGTGTGCTTAGCCTGCCGTCGTTAGAGCATCATGTGCATCATGCCCTTGAGGTGTGTTTC
GTGGACAACCCCGATGCAATCATAGCGCGCATCGCGACCCCAGGTCAGGCGGGAGCACCC
GCTGAGTT
>KU879012.1 Aquilaria agallochum
ATGCGATACTTGGTGTGAATTGCAGAATCCCGTGAACCATCGAGTCTTTGAACGCAAGTT
GCGCCCCAAGCCTTTGGGCCGAGGGCACGTCTGCCTGGGTGTCACGCATTGTAGCCCCCC
ACCCTCGTGGTAATGTCTGTGAGGGCTGTGTGCGGCTGATACTGGCCTTCCCGTATGCAC
AGCAATGCGGTTGGCCCAAATGGAGGAACCCAGGGCGGTGTATGCCATGATGAGCGGTGG
TGTGTGCTTAGCCTGCCGTCGTTAGAGCATCATGTGCATCATGCCCTTGAGGTGTGTTTC
GTGGACAACCCCGACGCAATCATAGCGCGCATCGCGACCCCAGGTCAAGCGGGAGCACCC
GCTGAGTT
>MH134138.1 Aquilaria beccariana
ATGCGATACTTGGTGTGAATTGCAGAATCCCGTGAACCATCGAGTATTTGAACGCAAGTT
GCGCCCCAAGCCTTTGGGCCGAGGGCACGTCTGCCTGGGTGTCACGCATTGTAGCCCCCC
ACCCTCGTGGTAATGTCTGTGAGGGCTGTGTGCGGCTGATACTGGCCTTCCCGTATGCAC
AGCAATGCGGTTGGCCCAAATGGAGGAACCCAGGGCGGTGTATGCCATGATGAGCGGTGG
TGTGTGCTTAGCCTGCCGTCGTTAGCGCATCATGTGCATCATGCCCTTGAGGTGTGTTTC
GTGGACAACCCCGATGCAATCATAGCGCGCATCGCGACCCCAGGTCAGGCGGGAGCACCC
GCTGAGTT
>KT779116.1 Aquilaria beccariana
ATGCGATACTTGGTGTGAATTGCAGAATCCCGTGAACCATCGAGTATTTGAACGCAAGTT
GCGCCCCAAGCCTTTGGGCCGAGGGCACGTCTGCCTGGGTGTCACGCATTGTAGCCCCCC
ACCCTCGTGGTAATGTCTATGAGGGCTGTGTGCGGCTGATACTGGCCTTCCCGTATGCAC
AGCAATGCGGTTGGCCCAAATGGAGGAACCCAGGGCAGTGCATGCCATGATGAGCGGTGG
TGTGCTCTTAGCCTGCCGTCGTTAGAGCATCATGTGCATCATGCCCTTGAGGTGTGTTTC
GTGGACAACCCCGATGCAATTGCAGCGCGCATCGCGACCCCAGGTCAGGCGGGAGCACCC
GCTGAGTT
>KT364477.1 Aquilaria beccariana
ATGCGATACTTGGTGTGA-TTGCAGAATCCCGTGAACCATCGAGTATTTGAACGCAAGTT
GCGCCCCAAGCCTTTGGGCCGAGGGCACGTCTGCCTGGGTGTCACGCATTGTAGCCCCCC
ACCCTTGTGGTAATGTCTGTGAGGGCTGTGTGCGGCTGATACTGGCCTTCCCGTATGCAC
AGCAATGCGGTTGGCCCAAATGGAGGAACCCAGGGCGGTGTATGCCATGATGAGCGGTGG
TGTGTGCTTAGCCTGCCGTCGTTAGAGCATCATGTGCATCATGCCCTTGAGGTGTGTTTC
GTGGACAACCCCGATGCAATCATAGCGCGCATCGCGACCCCAGGTCAGGCGGGAGCACCC
GCTGAGTT
>KX351419.1 Aquilaria beccariana
ATGCGATACTTGGTGTGA-TTGCAGAATCCCGTGAACCATCGAGTATTTGAACGCAAGTT
GCGCCCCAAGCCTTTGGGCCGAGGGCACGTCTGCCTGGGTGTCACGCATTGTAGCCCCCC
ACCCTCGTCGTAATGTCTGTGAGGGCTGTGTGGGGCTGATACTGGCCTTCCCGTATGCAC
AGCAATGCGGTTGGCCCAAATGGAGGAACCCAGGGCGGTGTATGCCATGATGAACGGTGG
TGTGTGCTTAGCCTGCCGTCGTTAGAGCATCATGCGCATCATGCCCTTGAGGTATGTTTC
GTGGACAACCCCGGTGCAATCATAGCGCGCATCGCGACCCCAGGTCAGGCGGGAGCACCC
GCTGAGTT
>KX424704.1 Aquilaria beccariana
ATGCGATACTTGGTGTGA-TTGCAGAATCCCGTGAACCATCGAGTATTTGAACGCAAGTT
GCGCCCCAAGCCTTTGGGCCGAGGGCACGTYTGCCTGGGTGTCACGCATTGTAGCCCCCC
ACCCTCGTGGTAATGTCTATGAGGGCTGTGTGCGGCTGATAYTGGCCTTCCCGTATGCAC
AGCAATGCGGTTGGCCCAAATGGAGGAACCCAGGGCAGTGCATGCCATGATGAGCGGTGG
TGTGCTCTTAGCCTGCCGTCGTTAGAGCATCATGTGCATCATGCCCTTGAGGTGTGTTTC
GTGGACAACCCCGRTGCAATTGCAGYGCGCATCGCGACCCCAGGTCAGGCGGGAGCACCC
GCTGAGTT
>KU244108.1 Aquilaria crassna
ATGCGATACTTGGTGTGAATTGCAGAATCCCGTGAACCATCGAGTCTTTGAACGCAAGTT
GCGCCCCAAGCCTTTGGGCCGAGGGCACGTCTGCCTGGGTGTCACGCATTGTAGCCCCCC
ACCCTCGTCGTAATGTCTGTGAGGGCTGTGTGGGGCTGATACTGGCCTTCCCGTATGCAC
AGCAATGCGGTTGGCCCAAATGGAGGAACCCAGGGCGGTGTATGCCATGATGAACGGTGG
TGTGTGCTTAGCCTGCCGTCGTTAGAGCATCATGCGCATCATGCCCTTGAGGTATGTTTC
GTGGACAACCCCGGTGCAATCATAGCGCGCATCGCGACCCCAGGTCAGGCGGGAGCACCC
GCTGAGTT
>KU238037.1 Aquilaria crassna
ATGCGATACTTGGTGTGAATTGCAGAATCCCGTGAACCATCGAGTCTTTGAACGCAAGTT
GCGCCCCAAGCCTTTGGGCCGAGGGCACGTCTGCCTGGGTGTCACGCATTGTAGCCCCCC
ACCCTCGTCGTAATGTCTGTGAGGGCTGTGTGGGGCTGATACTGGCCTTCCCGTATGCAC
AGCAATGCGGTTGGCCCAAATGGAGGAACCCAGGGCGGTGTATGCCATGATGAGCGGTGG
TGTGTGCTTAGCCTGCCGTCGTTAGAGCATCATGCGCATCATGCCCTTGAGGTATGTTTC
GTGGACAACCCCGGTGCAATCATAGCGCGCATCGCGACCCCAGGTCAGGCGGGAGCACCC
GCTGAGTT
>AY920326.1 Aquilaria crassna
ATGCGATACTTGGTGTGAATTGCAGAATCCCGTGAACCATCGAGTCTTTGAACGCAAGTT
GCGCCCCAAGCCTTTGGGCCGAGGGCACGTCTGCCTGGGTGTCACGCATTGTAGCCCCCC
ACCCTCGTCGTAATGTCTGTGAGGGCTGTGTGGGGCTGATACTGGCCTTCCCGTATGCAC
AGCAATGCGGTTGGCCCAAATGGAGGAACCCAGGGCGGTGTATGCCATGATGAACGGTGG
TGTGTGCTTAGCCTGCCGTCGTTAGAGCATCATGCGCATCATGCCCTTGAGGTATGTTTC
GTGGACAACCCCGGTGCAATCATAGCGCGCATCGCGACCCCAGGTCAGGCGGG-------
--------
>MH134140.1 Aquilaria cumingiana
ATGCGATACTTGGTGTGAATTGCAGAATCCCGTGAACCATCGAGTCTTTGAACGCAAGTT
GCGCCCCAAGCCTTTGGGCCGAGGGCACGTCTGCCTGGGTGTCACGCATTGTAGCCCCCC
ACCCTCGTGGTAATGTCTGTGAGGGCTGTGTGCGGCTGATACTGGCCTTCCCGTATGGAC
AGCAATGCGGTTGGCCCAAATGGAGGAACCCAGGGCGGTGTATGCCATGATGAGCGGTGG
TGTGTGCTTAGCCTGCCGTCGTTAAAGCATCATGTGCATCATGCCCTTGAGGTGTGTTTC
GTGGACAACCCCGATGCAATCATAGCGCGCATCGCGACCCCAGGTCAGGCGGGAGCACCC
GCTGAGTT
>KT779117.1 Aquilaria cumingiana
ATGCGATACTTGGTGTGAATTGCAGAATCCCGTGAACCATCGAGTCTTTGAACGCAAGTT
GCGCCCCAAGCCTTTGGGCCGAGGGCACGTCTGCCTGGGTGTCACGCATTGTAGCCCCCC
CCCATCGTGGTAATGCCCGTGAGGGCTGTGTGCGGCTGATACTGGCCTTCCCGTATGGAC
AGCAATGCGGTTGGCCCAAATGGAGGAACCCAGGGCGGTGTATGCCATGATGAGCGGTGG
TGTGTGCTTAGCCTGCCGTCGTTAAAGCATCATGTGCATCATGCCCTTGAGGTGTGTTTC
GTGGACAACCCCGATGCAATCATAGCGCGCATCGCGACCCCAGGTCAGGCGGGAGCACCC
GCTGAGTT
>KU244114.1 Aquilaria hirta
ATGCGATACTTGGTGTGAATTGCAGAATCCCGTGAACCATCGAGTATTTGAACGCAAGTT
GCGCCCCAAGCCTTTGGGCCGAGGGCACGTCTGCCTGGGTGTCACGCATTGTAGCCCCCC
ACCCTCGTGGTAATGTCTGTGAGGGCTGTGTGCGGCTGATACTGGCCTTCCCGTATGCAC
AGCAATGCGGTTGGCCCAAATGGAGGAACCCAGGGCGGTGTATGCCATGATGAGCGGTGG
TGTGTGCTTAGCCTGCCGTCGTTAGCGCATCATGTACATCATGCCCTTGAGGTGTGTTTC
GTGGACAACCCCGATGCAATCATAGCGCGCATCGCGACCCCAGGTCAGGCGGGAGCACCC
GCTGAGTT
>KT347175.1 Aquilaria hirta
ATGCGATACTTGGTGTGAATTGCAGAATCCCGTGAACCATCGAGTATTTGAACGCAAGTT
GCGCCCCAAGCCTTTGGGCCGAGGGCACGTCTGCCTGGGTGTCACGCATTGTAGCCCCCC
ACCCTCGTGGTAATGTCTGTGAGGGCTGTGTGCGGCTGATACTGGCCTTCCCGTATGCAC
AGCAATGCGGTTGGCCCAAATGGAGGAACCCAGGGCGGTGTATGCCATGATGAGCGGTGG
TGTGTGCTTAGCCTGCCGTCGTTAGCGCATCATGTGCATCATGCCCTTGAGGTGTGTTTC
GTGGACAACCCCGATGCAATCATAGCGCGCATCGCGACCCCAGGTCAGGCGGGAGCACCC
GCTGAGTT
>KX024765.1 Aquilaria malaccensis
ATGCGATACTTGGTGTGAATTGCAGAATCCCGTGAACCATCGAGTCTTTGAACGCAAGTT
GCGCCCCAAGCCTTTGGGCCGAGGGCACGTCTGCCTGGGTGTCACGCATTGTAGCCCCCC
ACCCTCGTGGTAATGTCTGTGAGGGCTGTGTGCGGCTGATACTGGCCTTCCCGTATGCAC
AGCAATGCGGTTGGCCCAAATGGAGGAACCCAGGGCGGTGTATGCCATGATGAGCGGTGG
TGTGTGCTTAGCCTGCCGTCGTTAGAGCATCATGTGCATCATGCCCTTGAGGTGTGTTTC
GTGGACAACCCCGATGCAATCATAGCGCGCATCGCGACCCCAGGTCAGGCGGGAGCACCC
GCTGAGTT
>MH134142.1 Aquilaria malaccensis
ATGCGATACTTGGTGTGAATTGCAGAATCCCGTGAACCATCGAGTATTTGAACGCAAGTT
GCGCCCCAAGCCTTTGGGCCGAGGGCACGTCTGCCTGGGTGTCACGCATTGTAGCCCCCC
ACCCTTGTGGTAATGTCTGTGAGGGCTGTGTGCGGCTGATACTGGCCTTCCCGTATGCAC
AGCAATGCGGTTGGCCCAAATGGAGGAACCCAGGGCGGTGTATGCCATGATGAGCGGTGG
TGTGTGCTTAGCCTGCCGTCGTTAGAGCATCATGTGCATCATGCCCTTGAGGTGTGTTTC
GTGGACAACCCCGATGCAATCATAGCGCGCATTGCGACCCCAGGTCAGGCGGGAGCACCC
GCTGAGTT
>KX024768.1 Aquilaria malaccensis
ATGCGATACTTGGTGTGAATTGCAGAATCCCGTGAACCATCGAGTCTTTGAACGCAAGTT
GCGCCCCAAGCCTTTGGGCCGAGGGCACGTCTGCCTGGGTGTCACGCATTGTAGCCCCCC
ACCCTCGTGGTAATGTCTGTGAGGGCTGTGTGCGGCTGATACTGGCCTTCCCGTATGCAC
AGCAATGCGGTTGGCCCAAATGGAGGAACCCAGGGCGGTGTATGCCATGATGAGCGGTGG
TGTGTGCTTAGCCTGCCGTCGTTAGAGCATCATGTGCATCATGCCCTTGAGGTGTGTTTC
GTGGACAACCCCGATGCAATCATAGCGCGCATCGCGACCCCAGGTCAGGCGGGAGCACCC
GCTGAGTT
>KX024772.1 Aquilaria malaccensis
ATGCGATACTTGGTGTGAATTGCAGAATCCCGTGAACCATCGAGTCTTTGAACGCAAGTT
GCGCCCCAAGCCTTTGGGCCGAGGGCACGTTTGCCTGGGTGTCACGCATTGTAGCCCCCC
ACCCTCGTGGTAATGTCTGTGAGGGCTGTGTGCGGCTGATACTGGCCTTCCCGTATGCAC
AGCAATGCGGTTGGCCCAAATGGAGGAACCCAGGGCGGTGTATGCCATGATGAGCGGTGG
TGTGTGCTTAGCCTGCCGTCGTTAGAGCATCATGTGCATCATGCCCTTGAGGTGTGTTTC
GTGGACAACCCCGATGCAATCTTAGCGCGCATCGCGACCCCCGGTCAGGCGGGAGCACCC
GCTGAGTT
>KX024767.1 Aquilaria malaccensis
ATGCGATACTTGGTGTGAATTGCAGAATCCCGTGAACCATCGAGTCTTTGAACGCAAGTT
GCGCCCCAAGCCTTTGGGCCGAGGGCACGTCTGCCTGGGTGTCACGCATTGTAGCCCCCC
ACCCTCGTGGTAATGTCTGTGAGGGCTGTGTGCGGCTGATACTGGCCTTCCCGTATGCAC
AGCAATGCGGTTGGCCCAAATGGAGGAACCCAGGGCGGTGTATGCCATGATGAGCGGTGG
TGTGTGCTTAGCCTGCCGTCGTTAGAGCATCATGTGCATCATGCCCTTGAGGTGTGTTTC
GTGGACAACCCCGATGCAATCATAGCGCGCATCGCGACCCCAGGTCAGGCGGGAGCACCC
GCTGAGTT
>KM887433.1 Aquilaria malaccensis
ATGCGATACTTGGTGTGAATTGCAGAATCCCGTGAACCATCGAGTCTTTGAACGCAAGTT
GCGCCCCAAGCCTTTGGGCCGAGGGCACGTCTGCCTGGGTGTCACGCATTGTAGCCCCCC
ACCCTCGTGGTAATGTCTGTGAGGGCTGTGTGCGGCTGATACTGGCCTTCCCGTATGCAC
AGCAATGCGGTTGGCCCAAATGGAGGAACCCAGGGCGGTGTATGCCATGATGAGCGGTGG
TGTGTGCTTAGCCTGCCGTCGTTAGAGCATCATGTGCATCATGCCCTTGAGGTGTGTTTC
GTGGACAACCCCGATGCAATCATAGCGCGCATCGCGACCCCAGGTCAGGCGGGAGCACCC
GCTGAGTT
>KF636365.1 Aquilaria malaccensis
ATGCGATACTTGGTGTGAATTGCAGAATCCCGTGAACCATCGAGTATTTGAACGCAAGTT
GCGCCCCAAGCCTTTGGGCCGAGGGCACGTCTGCCTGGGTGTCACGCATTGTAGCCCCCC
ACCCTTGTGGTAATGTCTGTGAGGGCTGTGTGCGGCTGATATTGGCCTTCCCGTATGCAC
AGCAATGCGGTTGGCCCAAATGGAGGAACCCAGGGCGGTGTATGCCATGATGAGCGGTGG
TGTGTGCTTAGCCTGCCGTCGTTAGAGCATCATGTGCATCATGCCCTTGAGGTGTGTTTC
GTGGACAACCCCGATGCAATCATAGCGCGCATTGCGACCCCAGGTCAGGCGGGAGCACCC
GCTGAGTT
>KY817954.1 Aquilaria malaccensis
ATGCGATACTTGGTGTGAATTGCAGAATCCCGTGAACCATCGAGTATTTGAACGCAAGTT
GCGCCCCAAGCCTTTGGGCCGAGGGCACGTCTGCCTGGGTGTCACGCATTGTAGCCCCCC
ACCCTTGTGGTAATGTCTGTGAGGGCTGTGTGCGGCTGATACTGGCCTTCCCGTATGCAC
AGCAATGCGGTTGGCCCAAATGGAGGAACCCAGGGCGGTGTATGCCATGATGAGCGGTGG
TGTGTGCTTAGCCTGCCGTCGTTAGAGCATCATGTGCATCATGCCCTTGAGGTGTGTTTC
GTGGACAACCCCGATGCAATCATAGCGCGCATTGCGACCCCAGGTCAGGCGGGAGCACCC
GCTGAGTT
>KX024769.1 Aquilaria malaccensis
ATGCGATACTTGGTGTGAATTGCAGAATCCCGTGAACCATCGAGTCTTTGAACGCAAGTT
GCGCCCCAAGCCTTTGGGCCGAGGGCACGTCTGCCTGGGTGTCACGCATTGTAGCCCCCC
ACCCTCGTGGTAATGTCTGTGAGGGCTGTGTGCGGCTGATACTGGCCTTCCCGTATGCAC
AGCAATGCGGTTGGCCCAAATGGAGGAACCCAGGGCGGTGTATGCCATGATGAGCGGTGG
TGTGTGCTTAGCCTGCCGTCGTTAGAGCATCATGTGCATCATGCCCTTGAGGTGTGTTTC
GTGGACAACCCCGATGCAATCT-AGCGCGCATCGCGACCCCCGGTCAGGCGGGAGCACCC
GC------
>KT347174.1 Aquilaria malaccensis
ATGCGATACTTGGTGTGAATTGCAGAATCCCGTGAACCATCGAGTATTTGAACGCAAGTT
GCGCCCCAAGCCTTTGGGCCGAGGGCACGTCTGCCTGGGTGTCACGCATTGTAGCCCCCC
ACCCTCGTGGTAATGTCTATGAGGGCTGTGTGCGGCTGATACTGGCCTTCCCGTATGCAC
AGCAATGCGGTTGGCCCAAATGGAGGAACCCAGGGCAGTGCATGCCATGATGAGCGGTGG
TGTGCTCTTAGCCTGCCGTCGTTAGAGCATCATGTGCATCATGCCCTTGAGGTGTGTTTC
GTGGACAACCCCGATGCAATTGCAGCGCGCATCGCGACCCCAGGTCAGGCGGGAGCACCC
GCTGAGTT
>KT779118.1 Aquilaria microcarpa
ATGCGATACTTGGTGTGAATTGCAGAATCCCGTGAACCATCGAGTATTTGAACGCAAGTT
GCGCCCCAAGCCTTTGGGCCGAGGGCACGTCTGCCTGGGTGTCACGCATTGTAGCCCCCC
ACCCTCGTGGTAATGTCTGTGAGGGCTGTGTGCGGCTGATACTGGCCTTCCCGTATGCAC
AGCAATGCGGTTGGCCCAAATGGAGGAACCCAGGGCGGTGTATGCCATGATGAGCGGTGG
TGTGTGCTTAGCCTGCCGTCGTTAGAGCATCATGTGCATCATGCCCTTGAGGTGTGTTTC
GTGGACAACCCCGATGTAATCATAGCGCGCATCGCGACCCCAGGTCAGGCGGGAGCACCC
GCTGAGTT
>KU244119.1 Aquilaria microcarpa
ATGCGATACTTGGTGTGAATTGCAGAATCCCGTGAACCATCGAGTATTTGAACGCAAGTT
GCGCCCCAAGCCTTTGGGCCGAGGGCACGTCTGCCTGGGTGTCACGCATTGTAGCCCCCC
ACCCTCGTGGTAATGTCTGTGAGGGCTGTGTGCGGCTGATACTGGCCTTCCCGTATGCAC
AGCAATGCGGTTGGCCCAAATGGAGGAACCCAGGGCGGTGTATGCCATGATGAGCGGTGG
TGTGTGCTTAGCCTGCCGTCGTTAGAGCATCATGTGCATCATGCCCTTGAGGTGTGTTTC
GTGGACAACCCCGATGTAATCATAGCGCGCATCGCGACCCCAGGTCAGGCGGGAGCACCC
GCTGAGTT
>KU244094.1 Aquilaria microcarpa
ATGCGATACTTGGTGTGAATTGCAGAATCCCGTGAACCATCGAGTATTTGAACGCAAGTT
GCGCCCCAAGCCTTTGGGCCGAGGGCACGTCTGCCTGGGTGTCACGCATTGTAGCCCCCC
ACCCTCGTGGTAATGTCTGTGAGGGCTGTGTGCGGCTGATACTGGCCTTCCCGTATGCAC
AGCAATGCGGTTGGCCCAAATGGAGGAACCCAGGGCGGTGTATGCCATGATGAGCGGTGG
TGTGTGCTTAGCCTGCCGTCGTTAGAGCATCATGTGCATCATGCCCTTGAGGTGTGTTTC
GTGGACAACCCCGATGTAATCATAGCGCGCATCGCGACCCCAGGTCAGGCGGGAGCACCC
GCTGAGTT
>KU244092.1 Aquilaria microcarpa
ATGCGATACTTGGTGTGAATTGCAGAATCCCGTGAACCATCGAGTATTTGAACGCAAGTT
GCGCCCCAAGCCTTTGGGCCGAGGGCACGTCTGCCTGGGTGTCACGCATTGTAGCCCCCC
ACCCTCGTGGTAATGTCTGTGAGGGCTGTGTGCGGCTGATACTGGCCTTCCCGTATGCAC
AGCAATGCGGTTGGCCCAAATGGAGGAACCCAGGGCGGTGTATGCCATGATGAGCGGTGG
TGTGTGCTTAGCCTGCCGTCGTTAGAGCATCATGTGCATCATGCCCTTGAGGTGTGTTTC
GTGGACAACCCCGATGTAATCATAGCGCGCATCGCGACCCCAGGTCAGGCGGGAGCACCC
GCTGAGTT
>MH134145.1 Aquilaria rugosa
ATGCGATACTTGGTGTGAATTGCAGAATCCCGTGAACCATCGAGTCTTTGAACGCAAGTT
GCGCCCCAAGCCTTTGGGCCGAGGGCACGTCTGCCTGGGTGTCACGCATTGTAGCCCCCC
ACCCTCGTGGTAATGTCTGTGAGGGCTGTGTGCGGCTGATACTGGCCTTCCCGTATGCAC
AGCAATGCGGTTGGCCCAAATGGAGGAACCCAGGGCGGTGTATGCCATGATGAGCGGTGG
TGTGTGCTTAGCCTGCCGTCGTTAGAGCATCATGTGCATCATGCCCTTGAGGTGTGTTTC
GTGGACAACCCCGACGCAATCATAGCGCGCATCGCGACCCCAGGTCAGGCGGGAGCACCC
GCTGAGTT
>AY920328.1 Aquilaria rugosa
ATGCGATACTTGGTGTGAATTGCAGAATCCCGTGAACCATCGAGTCTTTGAACGCAAGTT
GCGCCCCAAGCCTTTGGGCCGAGGGCACGTCTGCCTGGGTGTCACGCATTGTAGCCCCCC
ACCCTCGTGGTAATGTCTGTGAGGGCTGTGTGCGGCTGATACTGGCCTTCCCGTATGCAC
AGCAATGCGGTTGGCCCAAATGGAGGAACCCAGGGCGGTGTATGCCATGATGAGCGGTGG
TGTGTGCTTAGCCTGCCGTCGTTAGAGCATCATGTGCATCATGCCCTTGAGGTGTGTTTC
GTGGACAACCCCGATGCAATCT-AGCGCGCATCGCGACCCCAGGTCAGGCGGG-------
--------
>KU244121.1 Aquilaria sinensis
ATGCGATACTTGGTGTGAATTGCAGAATCCCGTGAACCATCGAGTCTTTGAACGCAAGTT
GCGCCCCAAGCCTTTGGGCCGAGGGCACGTCTGCCTGGGTGTCACGCATTGTAGCCCCCC
ACCCTCGTCGTAATGTCTGTGAGGGCTGTGTGGGGCTGATACTGGCCTTCCCGTATGCAC
AGCAATGCGGTTGGCCCAAATGGAGGAACCCAGGGCGGTGTATGCCATGATGAACGGTGG
TGTGTGCTTAGCCTGCCGTCGTTAGAGCATCATGCGCATCATGCCCTTGAGGTATGTTTC
GTGGACAACCCCGGTGCAATCATAGCGCGCATCGCGACCCCAGGTCAGGCGGGAGCACCC
GCTGAGTT
>KR531769.1 Aquilaria sinensis
ATGCGATACTTGGTGTGAATTGCAGAATCCCGTGAACCATCGAGTCTTTGAACGCAAGTT
GCGCCCCAAGCCTTTGGGCCGAGGGCACGTCTGCCTGGGTGTCACGCATTGTAGCCCCCC
ACCCTCGTGGTAATGTCTGTGAGGGCTGTGTGCGGCTGATACTGGCCTTCCCGTATGCAC
AGCAATGCGGTTGGCCCAAATGGAGGAACCCAGGGCGGTGTATGCCATGATGAGCGGTGG
TGTGTGCTTAGCCTGCCGTCGTTAGAGCATCATGTGCATCATGCCCTTGAGGTGTGTTTC
GTGGACAACCCCGACGCAATCATAGCGCGCATCGCGACCCCAGGTCAGGCGGGAGCACCC
GCTGAGTT
>KU238034.1 Aquilaria sinensis
ATGCGATACTTGGTGTGAATTGCAGAATCCCGTGAACCATCGAGTATTTGAACGCAAGTT
GCGCCCCAAGCCTTTGGGCCGAGGGCACGTCTGCCTGGGTGTCACGCATTGTAGCCCCCC
ACCCTTGTGGTAATGTCTGTGAGGGCTGTGTGCGGCTGATACTGGCCTTCCCGTATGCAC
AGCAATGCGGTTGGCCCAAATGGAGGAACCCAGGGCGGTGTATGCCATGATGAGCGGTGG
TGTGTGCTTAGCCTGCCGTCGTTAGAGCATCATGTGCATCATGCCCTTGAGGTGTGTTTC
GTGGACAACCCCGATGCAATCATAGCGCGCATTGCGACCCCAGGTCAGGCGGGAGCACCC
GCTGAGTT
>EF645833.1 Aquilaria sinensis
ATGCGATACTTGGTGTGAATTGCAGAATCCCGTGAACCATCGAGTCTTTGAACGCAAGTT
GCGCCCCAAGCCTTTGGGCCGAGGGCACGTCTGCCTGGGTGTCACGCATTGTAGCCCCTC
ACCCTCGTCGTAATGTCTGTGAGGGCTGTGTGGGGCTGATACTGGCCTTCCCGTATGCAC
AGCAATGCGGTTGGCCCAAATGGAGGAACCCAGGGCGGTGTATGCCATGATGAACGGTGG
TGTGTGCTTAGCCTGCCGTCGTTAGAGCATCATGCGCATCATGCCCTTGAGGTATGTTTC
GTGGACAACCGCGGTGCAATCATAGCGCGCATCGCGACCCCAGGTCAGGCGGGAGCACCC
GCTGAGTT
>KY817981.1 Aquilaria sinensis
ATGCGATACTTGGTGTGAATTGCAGAATCCCGTGAACCATCGAGTCTTTGAACGCAAGTT
GCGCCCCAAGCCTTTGGGCCGAGGGCACGTCTGCCTGGGTGTCACGCATTGTAGCCCCCC
ACCCTCGTCGTAATGTCTGTGAGGGCTGTGTGGGGCTGATACTGGCCTTCCCGTATGCAC
AGCAATGCGGTTGGCCCAAATGGAGGAACCCAGGGCGGTGTATGCCATGATGAACGGTGG
TGTGTGCTTAGCCTGCCGTCGTTAGAGCATCATGCGCATCATGCCCTTGAGGTATGTTTC
GTGGACAACCCCGGTGCAATCATAGCGCGCATCGCGACCCCAGGTCAGGCGGGAGCACCC
GCTGAGTT
>KY817955.1 Aquilaria subintegra
ATGCGATACTTGGTGTGAATTGCAGAATCCCGTGAACCATCGAGTCTTTGAACGCAAGTT
GCGCCCCAAGCCTTTGGGCCGAGGGCACGTCTGCCTGGGTGTCACGCATTGTAGCCCCCC
ACCCTCGTCGTAATGTCTGTGAGGGCTGTGTGGGGCTGATACTGGCCTTCCCGTATGCAC
AGCAATGCGGTTGGCCCAAATGGAGGAACCCAGGGCGGTGTATGCCATGATGAACGGTGG
TGTGTGCTTAGCCTGCCGTCGTTAGAGCATCATGCGCATCATGCCCTTGAGGTATGTTTC
GTGGACAACCCCGGTGCAATCATAGCGCGCATCGCGACCCCAGGTCAGGCGGGAGCACCC
GCTGAGTT
>KU244129.1 Aquilaria yunnanensis
ATGCGATACTTGGTGTGAATTGCAGAATCCCGTGAACCATCGAGTCTTTGAACGCAAGTT
GCGCCCCAAGCCTTTGGGCCGAGGGCACGTCTGCCTGGGTGTCACGCATTGTAGCCCCCC
ACCCTCGTGGTAATGTCTGTGAGGGCTGTGTGCGGCTGATACTGGCCTTCCCGTATGCAC
AGCAATGCGGTTGGCCCAAATGGAGGAACCCAGGGCGGTGTATGCCATGATGAGCGGTGG
TGTGTGCTTAGCCTGCCGTCGTTAGAGCATCATGTGCATCATGCCCTTGAGGTGTGTTTC
GTGGACAACCCCGACGCAATCATAGCGCGCATCGCGACCCCAGGTCAGGCGGGAGCACCC
GCTGAGTT
>AJ744931.1 Daphne mezereum OUT
ATGCGATACTTGGTGTGAATTGCAGAATCCCGTGAACCATCGAGTCTTTGAACGCAAGTT
GCGCCCCAAGCCTTCGGGTTGAGGGCACGTCTGCCTGGGTGTCACGCATTGTAGC-----
AGTAGTGCGGTTGGCTGAAATAGAGTAACCTAATGTCATGTATAC-ATGATGATCGGTGG
TTTGT-CTTGGCTTACCCTCGTTAAGTTATCATGTATAGCATGTCATTTGGTTGCATTTT
ACTTCAAACCTTTGTTTGAAGATAGTATGCATTGCGACCCCAGGTCAGGCGGGAATACCC
GCTGAGTT

## Sheet: Table S4
Table S4. rbcL sequence accession number and DNA information used in this study
>MF443405.1 Aquilaria agallochum
TTGACTTATTATACTCCTGAATATGAAACCAAAGATACTGATATCTTGGCAGCATTCCGA
GTAACTCCTCAACCTGGAGTTCCGCCTGAGGAAGCAGGGGCTGCGGTAGCTGCTGAATCT
TCTACTGGTACATGGACAACTGTGTGGACCGACGGGCTTACCAGCCTTGATCGTTACAAA
GGGCGATGCTACCACATCGAGCCCGTTGCTGGGGAAGAAAATCAATATATATGTTATGTA
GCTTACCCCTTAGACCTTTTTGAAGAGGGTTCTGTTACTAACATGTTTACTTCCATTGTT
GGTAATGTATTTGGGTTCAAAGCCCTGCGCGCTCTACGTCTAGAAGATCTGCGAATCCCT
ACTTCTTATATTAAAACTTTCCAAGGTCCGCCTCATGGCATCCAAGTTGAAAGAGATAAA
TTGAACAAGTACGGCCGTCCCCTATTGGGATGTACTATTAAACCTAAATTGGGGTTATCC
GCTAAAAACTACGGTAGAGCGGTTTATGAATGTCTACGTGGTGGACTTGATTTTAC
>KX424690.1 Aquilaria beccariana
TTGACTTATTATACTCCTGAATATGAAACCAAAGATACTGATATCTTGGCAGCATTCCGA
GTAACTCCTCAACCTGGAGTTCCGCCTGAGGAAGCAGGGGCTGCGGTAGCTGCTGAATCT
TCTACTGGTACATGGACAACTGTGTGGACCGACGGGCTTACCAGCCTTGATCGTTACAAA
GGGCGATGCTACCACATCGAGCCCGTTGCTGGGGAAGAAAATCAATATATATGTTATGTA
GCTTACCCCTTAGACCTTTTTGAAGAGGGTTCTGTTACTAACATGTTTACTTCCATTGTT
GGTAATGTATTTGGGTTCAAAGCCCTGCGCGCTCTACGTCTAGAAGATCTGCGAATCCCT
ACTTCTTATATTAAAACTTTCCAAGGTCCGCCTCATGGCATCCAAGTTGAAAGAGATAAA
TTGAACAAGTACGGCCGTCCCCTATTGGGATGTACTATTAAACCTAAATTGGGGTTATCC
GCTAAAAACTACGGTAGAGCGGTTTATGAATGTCTACGTGGTGGACTTGATTTTAC
>Y15149.1 Aquilaria beccariana
TTGACTTATTATACTCCTGAATATGAAACCAAAGATACTGATATCTTGGCAGCATTCCGA
GTAACTCCTCAACCTGGAGTTCCGCCTGAGGAAGCAGGGGCTGCGGTAGCTGCTGAATCT
TCTACTGGTACATGGACAACTGTGTGGACCGACGGGCTTACCAGCCTTGATCGTTACAAA
GGGCGATGCTACCACATCGAGCCCGTTGCTGGGGAAGAAAATCAATATATATGTTATGTA
GCTTACCCCTTAGACCTTTTGGAAGAGGGTTCTGTTACTAACATGTTTACTTCCATTGTT
GGTAATGTATTTGGGTTCAAAGCCCTGCGCGCTCTACGTCTAGAAGATCTGCGAATCCCT
ACTTCTTATATTAAAACTTTCCAAGGTCCGCCTCATGGCATCCAAGTTGAAAGAGATAAA
TTGAACAAGTACGGCCGTCCCCTATTGGGATGTACTATTAAACCTAAATTGGGGTTATCC
GCTAAAAACTACGGTAGAGCGGTTTATGAATGTCTACGTGGTGGACTTGATTTTAC
>KY927253.1 Aquilaria crassna
TTGACTTATTATACTCCTGAATATGAAACCAAAGATACTGATATCTTGGCAGCATTCCGA
GTAACTCCTCAACCTGGAGTTCCGCCTGAGGAAGCAGGGGCTGCGGTAGCTGCTGAATCT
TCTACTGGTACATGGACAACTGTGTGGACCGACGGGCTTACCAGCCTTGATCGTTACAAA
GGGCGATGCTACCACATCGAGCCCGTTGCTGGGGAAGAAAATCAATATATATGTTATGTA
GCTTACCCCTTAGACCTTTTTGAAGAGGGTTCTGTTACTAACATGTTTACTTCCATTGTT
GGTAATGTATTTGGGTTCAAAGCCCTGCGCGCTCTACGTCTAGAAGATCTGCGAATCCCT
ACTTCTTATATTAAAACTTTCCAAGGTCCGCCTCATGGCATCCAAGTTGAAAGAGATAAA
TTGAACAAGTACGGCCGTCCCCTATTGGGATGTACTATTAAACCTAAATTGGGGTTATCC
GCTAAAAACTACGGTAGAGCGGTTTATGAATGTCTACGAGGTGGACTTGATTTTAC
>MF443407.1 Aquilaria cumingiana
TTGACTTATTATACTCCTGAATATGAAACCAAAGATACTGATATCTTGGCAGCATTCCGA
GTAACTCCTCAACCTGGAGTTCCGCCTGAGGAAGCAGGGGCTGCGGTAGCTGCTGAATCT
TCTACTGGTACATGGACAACTGTGTGGACCGACGGGCTTACCAGCCTTGATCGTTACAAA
GGGCGATGCTACCACATCGAGCCCGTTGCTGGGGAAGAAAATCAATATATATGTTATGTA
GCTTACCCCTTAGACCTTTTTGAAGAGGGTTCTGTTACTAACATGTTTACTTCCATTGTT
GGTAATGTATTTGGGTTCAAAGCCCTGCGCGCTATACGTCTAGAAGATCTGCGAATCCCT
ACTTCTTATATTAAAACTTTCCAAGGTCCGCCTCATGGCATCCAAGTTGAAAGAGATAAA
TTGAACAAGTACGGCCGTCCCCTATTGGGATGTACTATTAAACCTAAATTGGGGTTATCC
GCTAAAAACTACGGGAGAGCGGTTTATGAATGTCTACATGGTGGACTTGATTTTAC
>KX424688.1 Aquilaria hirta
TTGACTTATTATACTCCTCAATATGAAACCAAAGATACTGATATCTTGGCAGCATTCCGA
GTAACTCCTCAACCTGGAGTTCCGCCTGAGGAAGCAGGGGCTGCGGTAGCTGCTGAATCT
TCTACTGGTACATGGACAACTGTGTGGACCGACGGGCTTACCAGCCTTGATCGTTACAAA
GGGCGATGCTACCACATCGAGCCCGTTGCTGGGGAAGAAAATCAATATATATGTTATGTA
GCTTACCCCTTAGACCTTTTTGAAGAGGGTTCTGTTACTAACATGTTTACTTCCATTGTT
GGTAATGTATTTGGGTTCAAAGCCCTGCGCGCTCTACGTCTAGAAGATCTGCGAATCCCT
ACTTCTTATATTAAAACTTTCCAAGGTCCGCCTCATGGCATCCAAGTTGAAAGAGATAAA
TTGAACAAGTACGGCCGTCCCCTATTGGGATGTACTATTAAACCTAAATTGGGGTTATCC
GCTAAAAACTACGGTAGAGCGGTTTATGAATGTCTACGTGGTGGACTTGATTTTAC
>KU244218.1 Aquilaria hirta
TTGACTTATTATACTCCTCAATATGAAACCAAAGATACTGATATCTTGACAGCATTCCGA
GTAACTCCTCAACCTGGAGTTCCGCCTGAGGAAGCAGGGGCTGCGGTAGCTGCTGAATCT
TCTACTGGTACATGGACAACTGTGTGGACCGACGGGCTTACCAGCCTTGATCGTTACAAA
GGGCGATGCTACCACATCGAGCCCGTTGCTGGGGAAGACAATCAATATGTATGTTATGTA
GCTTACCCCTTAGACCTTTTTGAAGAGGGTTCTGTTACTAACATGTTTACTTCCATTGTT
GGTAATGTATTTGGGTTCAAAGCCCTGCGCGCTCTACGTCTAGAAGATCTGCGAATCCCT
ACTTCTTATATTAAAACTTTCCAAGGTCCGCCTCATGGCATCCAAGTTGAAAGAGATAAA
TTGAACAAGTACGGCCGTCCCCTATTGGGATGTACTATTAAACCTAAATTGGGGTTATCC
GCTAAAAACTACGGTAGAGCGGTTTATGAATGTCTACGTGGTGGACTTGATTTTAC
>KY927277.1 Aquilaria hirta
TTGACTTATTATACTCCTCAATATGAAACCAAAGATACTGATATCTTGGCAGCATTCCGA
GTAACTCCTCAACCTGGAGTTCCGCCTGAGGAAGCAGGGGCTGCGGTAGCTGCTGAATCT
TCTACTGGTACATGGACAACTGTGTGGACCGACGGGCTTACCAGCCTTGATCGTTACAAA
GGGCGATGCTACCACATCGAGCCCGTTGCTGGGGAAGAAAATCAATATATATGTTATGTA
GCTTACCCCTTAGACCTTTTTGAAGAGGGTTCTGTTACTAACATGTTTACTTCCATTGTT
GGTAATGTATTTGGGTTCAAAGCCCTGCGCGCTCTACGTCTAGAAGATCTGCGAATCCCT
ACTTCTTATATTAAAACTTTCCAAGGTCCGCCTCATGGCATCCAAGTTGAAAGAGATAAA
TTGAACAAGTACGGCCGTCCCCTATTGGGATGTACTATTAAACCTAAATTGGGGTTATCC
GCTAAAAACTACGGTAGAGCGGTTTATGAATGTCTACGAGGTGGACTTGATTTTAC
>KU244219.1 Aquilaria malaccensis
TTGACTTATTATACTCCTGAATATGAAACCAAAGATACTGATATCTTGGCAGCATTCCGA
GTAACTCCTCAACCTGGAGTTCCGCCTGAGGAAGCAGGGGCTGCGGTAGCTGCTGAATCT
TCTACTGGTACATGGACAACTGTGTGGACCGACGGGCTTACCAGCCTTGATCGTTACAAA
GGGCGATGCTACCACATCGAGCCCGTTGCTGGGGAAGAAAATCAATATATATGTTATGTA
GCTTACCCCTTAGACCTTTTTGAAGAGGGTTCTGTTACTAACATGTTTACTTCCATTGTT
GGTAATGTATTTGGGTTCAAAGCCCTGCGCGCTCTACGTCTAGAAGATCTGCGAATCCCT
ACTTCTTATATTAAAACTTTCCAAGGTCCGCCTCATGGCATCCAAGTTGAAAGAGATAAA
TTGAACAAGTACGGCCGTCCCCTATTGGGATGTACTATTAAACCTAAATTGGGGTTATCC
GCTAAAAACTACGGTAGAGCGGTTTATGAATGTCTACGTGGTGGACTTGATTTTAC
>KU244221.1 Aquilaria malaccensis
TTGACTTATTATACTCCTGAATATGAAACCAAAGATACTGATATCTTGGCAGCATTCCGA
GTCACTCCTCAACCTGGAGTTCCGCCTGAGGAAGCAGGGGCTGCGGTAGCTGCTGAATCT
TCTACTGGTACATGGACAACTGTGTGGACCGACGGGCTTACCAGCCTTGATCGTTACAAA
GGGCGATGCTACCACATCGAGCCCGTTGCTGGGGAAGAAAATCAATATATATGTTATGTA
GCTTACCCCTTAGACCTTTTTGAAGAGGGTTCTGTTACTAACATGTTTACTTCCATTGTT
GGTAATGTATTTGGGTTCAAAGCCCTGCGCGCTCTACGTCTAGAAGATCTGCGAATCCCT
ACTTCTTATATTAAAACTTTCCAAGGTCCGCCTCATGGCATCCAAGTTGAAAGAGATAAA
TTGAACAAGTACGGCCGTCCCCTATTGGGATGTACTATTAAACCTAAATTGGGGTTATCC
GCTAAAAACTACGGTAGAGCGGTTTATGAATGTCTACGTGGTGGACTTGATTTTAC
>KJ667626.1 Aquilaria malaccensis
TTGACTTATTATACTCCTGAATATGAAACCAAAGATACTGATATCTTGGCAGCATTCCGA
GTAACTCCTCAACCTGGAGTTCCGCCTGAGGAAGCAGGGGCTGCGGTAGCTGCTGAATCT
TCTACTGGTACATGGACAACTGTGTGGACCGACGGGCTTACCAGCCTTGATCGTTACAAA
GGGCGATGCTACCACATCGAGCCCGTTGCTGGGGAAGAAAATCAATATATATGTTATGTA
GCTTACCCCTTAGACCTTTTTGAAGAGGGTTCTGTTACTAACATGTTTACTTCCATTGTT
GGTAATGTATTTGGGTTCAAAGCCCTGCGCGCTCTACGTCTAGAAGATCTGCGAATCCCT
ACTTCTTATATTAAAACTTTCCAAGGTCCGCCTCATGGCATCCAAGTTGAAAGAGATAAA
TTGAACAAGTACGGCCGTCCCCTATTGGGATGTACCCTTAAACCTAAATTGGGGTTATTC
GCTAAAAACTACGGTAGAGCGGTTTATGAATGTCTACGTGGTGGACTTGATTTTAC
>KY927276.1 Aquilaria malaccensis
TTGACTTATTATACTCCTGAATATGAAACCAAAGATACTGATATCTTGGCAGCATTCCGA
GTAACTCCTCAACCTGGAGTTCCGCCTGAGGAAGCAGGGGCTGCGGTAGCTGCTGAATCT
TCTACTGGTACATGGACAACTGTGTGGACCGACGGGCTTACCAGCCTTGATCGTTACAAA
GGGCGATGCTACCACATCGAGCCCGTTGCTGGGGAAGAAAATCAATATATATGTTATGTA
GCTTACCCCTTAGACCTTTTTGAAGAGGGTTCTGTTACTAACATGTTTACTTCCATTGTT
GGTAATGTATTTGGGTTCAAAGCCCTGCGCGCTCTACGTCTAGAAGATCTGCGAATCCCT
ACTTCTTATATTAAAACTTTCCAAGGTCCGCCTCATGGCATCCAAGTTGAAAGAGATAAA
TTGAACAAGTACGGCCGTCCCCTATTGGGATGTACTATTAAACCTAAATTGGGGTTATCC
GCTAAAAACTACGGTAGAGCGGTTTATGAATGTCTACGAGGTGGACTTGATTTTAC
>KY927267.1 Aquilaria malaccensis
TTGACTTATTATACTCCTCAATATGAAACCAAAGATACTGATATCTTGGCAGCATTCCGA
GTAACTCCTCAACCTGGAGTTCCGCCTGAGGAAGCAGGGGCTGCGGTAGCTGCTGAATCT
TCTACTGGTACATGGACAACTGTGTGGACCGACGGGCTTACCAGCCTTGATCGTTACAAA
GGGCGATGCTACCACATCGAGCCCGTTGCTGGGGAAGAAAATCAATATATATGTTATGTA
GCTTACCCCTTAGACCTTTTTGAAGAGGGTTCTGTTACTAACATGTTTACTTCCATTGTT
GGTAATGTATTTGGGTTCAAAGCCCTGCGCGCTCTACGTCTAGAAGATCTGCGAATCCCT
ACTTCTTATATTAAAACTTTCCAAGGTCCGCCTCATGGCATCCAAGTTGAAAGAGATAAA
TTGAACAAGTACGGCCGTCCCCTATTGGGATGTACTATTAAACCTAAATTGGGGTTATCC
GCTAAAAACTACGGTAGAGCGGTTTATGAATGTCTACGAGGTGGACTTGATTTTAC
>MF443409.1 Aquilaria rugosa
TTGACTTATTATACTCCTGAATATGAAACCAAAGATACTGATATCTTGGCAGCATTCCGA
GTAACTCCTCAACCTGGAGTTCCGCCTGAGGAAGCAGGGGCTGCGGTAGCTGCTGAATCT
TCTACTGGTACATGGACAACTGTGTGGACCGACGGGCTTACCAGCCTTGATCGTTACAAA
GGGCGATGCTACCACATCGAGCCCGTTGCTGGGGAAGAAAATCAATATATATGTTATGTA
GCTTACCCCTTAGACCTTTTTGAAGAGGGTTCTGTTACTAACATGTTTACTTCCATTGTT
GGTAATGTATTTGGGTTCAAAGCCCTGCGCGCTCTACGTCTAGAAGATCTGCGAATCCCT
ACTTCTTATATTAAAACTTTCCAAGGTCCGCCTCATGGCATCCAAGTTGAAAGAGATAAA
TTGAACAAGTACGGCCGTCCCCTATTGGGATGTACTATTAAACCTAAATTGGGGTTATCC
GCTAAAAACTACGGTAGAGCGGTTTATGAATGTCTACGTGGTGGACTTGATTTTAC
>KU244227.1 Aquilaria sinensis
TTGACTTATTATACTCCTGAATATGAAACCAAAGATACTGATATCTTGGCAGCATTCCGA
GTAACTCCTCAACCTGGAGTTCCGCCTGAGGAAGCAGGGGCTGCGGTAGCTGCTGAATCT
TCTACTGGTACATGGACAACTGTGTGGACCGACGGGCTTACCAGCCTTGATCGTTACAAA
GGGCGATGCTACCACATCGAGCCCGTTGCTGGGGAAGAAAATCAATATATATGTTATGTA
GCTTACCCCTTAGACCTTTTTGAAGAGGGTTCTGTTACTAACATGTTTACTTCCATTGTT
GGTAATGTATTTGGGTTCAAAGCCCTGCGCGCTCTACGTCTAGAAGATCTGCGAATCCCT
ACTTCTTATATTAAAACTTTCCAAGGTCCGCCTCATGGCATCCAAGTTGAAAGAGATAAA
TTGAACAAGTACGGCCGTCCCCTATTGGGATGTACTATTAAACCTAAATTGGGGTTATCC
GCTAAAAACTACGGTAGAGCGGTTTATGAATGTCTACGTGGTGGACTTGATTTTAC
>KU244226.1 Aquilaria sinensis
TTGACTTATTATACTCCTGAATATGAAACCAAAGATACTGATATCTTGGCAGCATTCCGA
GTAACTCCTCAACCTGGAGTTCCGCCTGAGGAAGCAGGGGCTGCGGTAGCTGCTGAATCT
TCTACTGGTACATGGACAACTGTGTGGACCGACGGGCTTACCAGCCTTGATCGTTACAAA
GGGCGATGCTACCACATCGAGCCCGTTGCTGGGGAAGAAAATCAATATATATGTTATGTA
GCTTACCCCTTAGACCTTTTTGAAGAGGGTTCTGTTACTAACATGTTTACTTCCATTGTT
GGTAATGTATTTGGGTTCAAAGCCCTGCGCGCTCTACGTCTAGAAGATCTGCGAATCCCT
ACTTCTTATATTAAAACTTTCCAAGGTCCGCCTCATGGCATCCAAGTTGAAAGAGATAAA
TTGAACAAGTACGGCCGTCCCCTATTGGGATGTACTATTAAACCTAAATTGGGGTTATCC
GCTAAAAACTACGGTAGAGCGGTTTATGAATGTCTACGTGGTGGACTTGATTTTAC
>KU244225.1 Aquilaria sinensis
TTGACTTATTATACTCCTGAATATGAAACCAAAGATACTGATATCTTGGCAGCATTCCGA
GTAACTCCTCAACCTGGAGTTCCGCCTGAGGAAGCAGGGGCTGCGGTAGCTGCTGAATCT
TCTACTGGTACATGGACAACTGTGTGGACCGACGGGCTTACCAGCCTTGATCGTTACAAA
GGGCGATGCTACCACATCGAGCCCGTTGCTGGGGAAGAAAATCAATATATATGTTATGTA
GCTTACCCCTTAGACCTTTTTGAAGAGGGTTCTGTTACTAACATGTTTACTTCCATTGTT
GGTAATGTATTTGGGTTCAAAGCCCTGCGCGCTCTACGTCTAGAAGATCTGCGAATCCCT
ACTTCTTATATTAAAACTTTCCAAGGTCCGCCTCATGGCATCCAAGTTGAAAGAGATAAA
TTGAACAAGTACGGCCGTCCCCTATTGGGATGTACTATTAAACCTAAATTGGGGTTATCC
GCTAAAAACTACGGTAGAGCGGTTTATGAATGTCTACGTGGTGGACTTGATTTTAC
>KY927292.1 Aquilaria sinensis
TTGACTTATTATACTCCTGAATATGAAACCAAAGATACTGATATCTTGGCAGCATTCCGA
GTAACTCCTCAACCTGGAGTTCCGCCTGAGGAAGCAGGGGCTGCGGTAGCTGCTGAATCT
TCTACTGGTACATGGACAACTGTGTGGACCGACGGGCTTACCAGCCTTGATCGTTACAAA
GGGCGATGCTACCACATCGAGCCCGTTGCTGGGGAAGAAAATCAATATATATGTTATGTA
GCTTACCCCTTAGACCTTTTTGAAGAGGGTTCTGTTACTAACATGTTTACTTCCATTGTT
GGTAATGTATTTGGGTTCAAAGCCCTGCGCGCTCTACGTCTAGAAGATCTGCGAATCCCT
ACTTCTTATATTAAAACTTTCCAAGGTCCGCCTCATGGCATCCAAGTTGAAAGAGATAAA
TTGAACAAGTACGGCCGTCCCCTATTGGGATGTACTATTAAACCTAAATTGGGGTTATCC
GCTAAAAACTACGGTAGAGCGGTTTATGAATGTCTACGAGGTGGACTTGATTTTAC
>KY927291.1 Aquilaria sinensis
TTGACTTATTATACTCCTGAATATGAAACCAAAGATACTGATATCTTGGCAGCATTCCGA
GTAACTCCTCAACCTGGAGTTCCGCCTGAGGAAGCAGGGGCTGCGGTAGCTGCTGAATCT
TCTACTGGTACATGGACAACTGTGTGGACCGACGGGCTTACCAGCCTTGATCGTTACAAA
GGGCGATGCTACCACATCGAGCCCGTTGCTGGGGAAGAAAATCAATATATATGTTATGTA
GCTTACCCCTTAGACCTTTTTGAAGAGGGTTCTGTTACTAACATGTTTACTTCCATTGTT
GGTAATGTATTTGGGTTCAAAGCCCTGCGCGCTCTACGTCTAGAAGATCTGCGAATCCCT
ACTTCTTATATTAAAACTTTCCAAGGTCCGCCTCATGGCATCCAAGTTGAAAGAGATAAA
TTGAACAAGTACGGCCGTCCCCTATTGGGATGTACTATTAAACCTAAATTGGGGTTATCC
GCTAAAAACTACGGTAGAGCGGTTTATGAATGTCTACGAGGTGGACTTGATTTTAC
>KY927289.1 Aquilaria sinensis
TTGACTTATTATACTCCTGAATATGAAACCAAAGATACTGATATCTTGGCAGCATTCCGA
GTAACTCCTCAACCTGGAGTTCCGCCTGAGGAAGCAGGGGCTGCGGTAGCTGCTGAATCT
TCTACTGGTACATGGACAACTGTGTGGACCGACGGGCTTACCAGCCTTGATCGTTACAAA
GGGCGATGCTACCACATCGAGCCCGTTGCTGGGGAAGAAAATCAATATATATGTTATGTA
GCTTACCCCTTAGACCTTTTTGAAGAGGGTTCTGTTACTAACATGTTTACTTCCATTGTT
GGTAATGTATTTGGGTTCAAAGCCCTGCGCGCTCTACGTCTAGAAGATCTGCGAATCCCT
ACTTCTTATATTAAAACTTTCCAAGGTCCGCCTCATGGCATCCAAGTTGAAAGAGATAAA
TTGAACAAGTACGGCCGTCCCCTATTGGGATGTACTATTAAACCTAAATTGGGGTTATCC
GCTAAAAACTACGGTAGAGCGGTTTATGAATGTCTACGAGGTGGACTTGATTTTAC
>KU244233.1 Aquilaria yunnanensis
TTGACTTATTATACTCCTGAATATGAAACCAAAGATACTGATATCTTGGCAGCATTCCGA
GTAACTCCTCAACCTGGAGTTCCGCCTGAGGAAGCAGGGGCTGCGGTAGCTGCTGAATCT
TCTACTGGTACATGGACAACTGTGTGGACCGACGGGCTTACCAGCCTTGATCGTTACAAA
GGGCGATGCTACCACATCGAGCCCGTTGCTGGGGAAGAAAATCAATATATATGTTATGTA
GCTTACCCCTTAGACCTTTTTGAAGAGGGTTCTGTTACTAACATGTTTACTTCCATTGTT
GGTAATGTATTTGGGTTCAAAGCCCTGCGCGCTCTACGTCTAGAAGATCTGCGAATCCCT
ACTTCTTATATTAAAACTTTCCAAGGTCCGCCTCATGGCATCCAAGTTGAAAGAGATAAA
TTGAACAAGTACGGCCGTCCCCTATTGGGATGTACTATTAAACCTAAATTGGGGTTATCC
GCTAAAAACTACGGTAGAGCGGTTTATGAATGTCTACGTGGTGGACTTGATTTTAC
>KY927296.1 Aquilaria yunnanensis
TTGACTTATTATACTCCTGAATATGAAACCAAAGATACTGATATCTTGGCAGCATTCCGA
GTAACTCCTCAACCTGGAGTTCCGCCTGAGGAAGCAGGGGCTGCGGTAGCTGCTGAATCT
TCTACTGGTACATGGACAACTGTGTGGACCGACGGGCTTACCAGCCTTGATCGTTACAAA
GGGCGATGCTACCACATCGAGCCCGTTGCTGGGGAAGAAAATCAATATATATGTTATGTA
GCTTACCCCTTAGACCTTTTTGAAGAGGGTTCTGTTACTAACATGTTTACTTCCATTGTT
GGTAATGTATTTGGGTTCAAAGCCCTGCGCGCTCTACGTCTAGAAGATCTGCGAATCCCT
ACTTCTTATATTAAAACTTTCCAAGGTCCGCCTCATGGCATCCAAGTTGAAAGAGATAAA
TTGAACAAGTACGGCCGTCCCCTATTGGGATGTACTATTAAACCTAAATTGGGGTTATCC
GCTAAAAACTACGGTAGAGCGGTTTATGAATGTCTACGAGGTGGACTTGATTTTAC
>KY927295.1 Aquilaria yunnanensis
TTGACTTATTATACTCCTGAATATGAAACCAAAGATACTGATATCTTGGCAGCATTCCGA
GTAACTCCTCAACCTGGAGTTCCGCCTGAGGAAGCAGGGGCTGCGGTAGCTGCTGAATCT
TCTACTGGTACATGGACAACTGTGTGGACCGACGGGCTTACCAGCCTTGATCGTTACAAA
GGGCGATGCTACCACATCGAGCCCGTTGCTGGGGAAGAAAATCAATATATATGTTATGTA
GCTTACCCCTTAGACCTTTTTGAAGAGGGTTCTGTTACTAACATGTTTACTTCCATTGTT
GGTAATGTATTTGGGTTCAAAGCCCTGCGCGCTCTACGTCTAGAAGATCTGCGAATCCCT
ACTTCTTATATTAAAACTTTCCAAGGTCCGCCTCATGGCATCCAAGTTGAAAGAGATAAA
TTGAACAAGTACGGCCGTCCCCTATTGGGATGTACTATTAAACCTAAATTGGGGTTATCC
GCTAAAAACTACGGTAGAGCGGTTTATGAATGTCTACGAGGTGGACTTGATTTTAC
>AF022132.1 Daphne mezereum OUT
TTGACTTATTATACTCCTGAATATGAAACCAAAGATACTGATATCTTGGCAGCGTTCCGA
GTAACTCCTCAACCAGGAGTTCCGCCTGAGGAAGCAGGGGCCGCGGTAGCTGCTGAATCT
TCTACTGGTACATGGACAACTGTGTGGACCGACGGGCTTACCAGCCTTGATCGTTACAAA
GGGCGATGCTACCACATCGAGCCCGTTCCTGGGGAAGAAAATCAATATATATGTTATGTA
GCTTACCCCTTAGACCTTTTTGAAGAAGGTTCTGTTACTAACATGTTTACTTCCATTGTT
GGTAATGTATTTGGGTTCAAAGCTCTGCGCGCTCTACGTCTAGAGGATCTGCGAATCCCT
ACTGCTTATGTTAAAACTTTCCAAGGTCCGCCCCATGGCATCCAAGTTGAAAGAGATAAA
TTGAACAAGTACGGCCGTCCCCTGTTAGGATGTACTATTAAACCTAAATTGGGGTTATCC
GCTAAGAACTACGGTAGAGCGGTTTATGAATGTCTACGTGGTGGACTTGATTTTAC

## Sheet: Table S5
Table S5. trnL-trnF sequence accession number and DNA information used in this study
>MF443428.1 Aquilaria agallochum
CAACCTCCAAAACCCGCTGACGCTCTACCT-ATTTTTTTTTTTG--ATTTCTACCTATTT
T--TTATCTTACCCTCTCCTTTTGTTAGTGGTTCAAAGTTACTTATC-TTTCCCATTCAT
CCTA--TTCTTTTCCATTTTACAGGCG-TATCCGAGCATCATTTTTTCTCTT-AACACAA
ATATAGGTACAAATCAACATTTTTGAGTAAGGAATACCCATTTGAATGAT--TCAAAATC
ATTACTCAGACTGAAACTTA-CATACAAAGTCGTCCCTTCGAAGATTCTGTCAATTCCCG
--TTCGCT-ACTTTGACTTTGATTTTATTTGAATACTTTTTTTCGTCTTTTTT-------
AAAAATGAGGATGATGTCTTGGTAATGGTCGGGATAGCTCAGCTGGTAGAGCA-GAGGAC
TGAAAATC
>AY216740.1 Aquilaria beccariana
CAACCTCCAAAACCCGCTGACGCTCTACCT-ATTTTTTTTTG----ATTTCTACCTATTT
T--TTATCTTACCCTCTCCTTTTGTTAGTGGTTCAAAGTTACTTATC-TTTCCCATTCAT
CCTA--TTCTTTTCCATTTTACAGGCG-TATCCGAGCATCATTTTTTCTCTT-AACACAA
ATCTAGGTACAAATCAACATTTTTGAGTAAGGAATACCCATTTGAATGAT--TCAAAATC
ATTACTCAGACTGAAACTTA-CATACAAAGTCGTCCCTTCGAAGATTCTGTCAATTCCCG
--TTCGCT-ACTTTGACTTTTATTTTATTTTAATACTTTTTTTCGTCTTTTTT-------
AAAAATGAGGATGATGTCTTGGTAATGGTCGGGATAGCTCAGCTGGTAGAGCAGA-GGAC
TGAAAATC
>KT726319.1 Aquilaria beccariana
CAACCTCCAAAACCCGCTGACGCTCTACCT-ATTTTTTTTTG----ATTTCTACCTATTT
T--TTATCTTACCCTCTCCTTTTGTTAGTGGTTCAAAGTTACTTATC-TTTCCCATTCAT
CCTA--TTCTTTTCCATTTTACAGGCG-TATCCGAGCATCATTTTTTCTCTT-AACACAA
ATATAGGTACAAATCAACATTTTTGAGTAAGGAATACCCATTTGAATGAT--TCAAAATC
ATTACTCAGACTGAAACTTA-CATACAAAGTCGTCCCTTCGAAGATTCTGTCAATTCCCG
--TTCGCT-ACTTTGACTTTTATTTTATTTTAATACTTTTTTTCGTCTTTTTT-------
AAAAATGAGGATGATGTCTTGGTAATGGTCGGGATAGCTCAGCTGGTAGAGCAGA-GGAC
TGAAAATC
>KT364470.1 Aquilaria beccariana
CAACCTCCAAAACCCGCTGACGCTCTACCT-ATTTTTTTTTG----ATTTCTACCTATTT
T--TTATCTTACCCTCTCCTTTTGTTAGTGGTTCAAAGTTACTTATC-TTTCCCATTCAT
CCTA--TTCTTTTCCATTTTACAGGCG-TATCCGAGCATCATTTTTTCTCTT-AACACAA
ATCTAGGTACAAATCAACATTTTTGAGTAAGGAATACCCATTTGAATGAT--TCAAAATC
ATTACTCAGACTGAAACTTA-CATACAAAGTCGTCCCTTCGAAGATTCTGTCAATTCCCG
--TTCGCT-ACTTTGACTTTTATTTTATTTTAATACTTTTTTTCGTCTTTTTT-------
AAAAATGAGGATGATGTCTTGGTAATGGTCGGGATAGCTCAGCTGGTAGAGCAGA-GGAC
TGAAAATC
>AJ308643.1 Aquilaria beccariana
CAACCTTCAAAACCCGCTGACGCTCTACCT-ATTTTTTTTTTT---ATTTCTACCTAATT
T--TTATCTTAC----TCTTTCTGTGAGGGGG-CAAAGTTACTTATCCTTTCTTATTTAA
CCAAATTCTTTTTCCATTTTACAGG---TATCCGAG-ATCATTTTTTCTCTTTAACCCAA
ATATAGGTACAAATCAACATTTTTGAGTAAGGAATACCCATTTGAATGAT--TCAAAATC
ATTACTCAGACTGAAACTTA-CATACAAAGTGGTCCCTTCGAAGATTCTGTCAATTCCCG
--TTCGCT-ACTTTGACTTTTATTTTATTTTAATACTTTTTTTCGTCTTTTTT-------
AAAAATGAGGATGATGTCTTGGTAATGGTCGGGATAGCACAGCTGGTAGAGCAGA-GGAC
TGAAAATC
>KU238027.1 Aquilaria crassna
CAACCTCCAAAACCCGCTGACGCTCTACCT-ATTTTTTTTTG----ATTTCTACCTATTT
T--TTATCTTACCCTCTCCTTTTGTTAGTGGTTCAAAGTTACTTATC-TTTCCCATTCAT
CCTA--TTCTTTTCCATTTTACAGGCG-TATCCGAGCATCATTTTTTCTCTT-AACACAA
ATATAGGTACAAATCAACATTTTTGAGTAAGGAATACCCATTTGAATGAT--TCAAAATC
ATTACTCAGACTGAAACTTA-CATACAAAGTCGTCCCTTCGAAGATTCTGTCAATTCCCG
--TTCGCT-ACTTTGACTTTTATTTTATTTGAATACTTTTTTTCGTCTTTTTT-------
CAAAATGAGGATGATGTCTTGGTAATGGTCGGGATAGCTCAGCTGGTAGAGCAGA-GGAC
TGAAAATC
>KT364471.1 Aquilaria crassna
CAACCTCCAAAACCCGCTGACGCTCTACCT-ATTTTTTTTTG----ATTTCTACCTATTT
T--TTATCTTACCCTCTCCTTTTGTTAGTGGTTCAAAGTTACTTATC-TTTCCCATTCAT
CCTA--TTCTTTTCCATTTTACAGGCG-TATCCGAGCATCATTTTTTCTCTT-AACACAA
ATATAGGTACAAATCAACATTTTTGAGTAAGGAATACCCATTTGAATGAT--TCAAAATC
ATTACTCAGACTGAAACTTA-CATACAAAGTCGTCCCTTCGAAGATTCTGTCAATTCCCG
--TTCGCT-ACTTTGACTTTTATTTTATTTGAATACTTTTTTTCGTCTTTTTT-------
CAAAATGAGGATGATGTCTTGGTAATGGTCGGGATAGCTCAGCTGGTAGAGCAGA-GGAC
TGAAAATC
>KY927249.1 Aquilaria crassna
CAACCTCCAAAACCCGCTGACGCTCTACCT-ATTTTTTTTTG----ATTTCTACCTATTT
T--TTATCTTACCCTCTCCTTTTGTTAGTGGTTCAAAGTTACTTATC-TTTCCCATTCAT
CCTA--TTCTTTTCCATTTTACAGGCG-TATCCGAGCATCATTTTTTCTCTT-AACACAA
ATATAGGTACAAATCAACATTTTTGAGTAAGGAATACCCATTTGAATGAT--TCAAAATC
ATTACTCAGACTGAAACTTA-CATACAAAGTCGTCCCTTCGAAGATTCTGTCAATTCCCG
--TTCGCT-ACTTTGACTTTTATTTTATTTGAATACTTTTTTTCGTCTTTTTT-------
CAAAATGAGGATGATGTCTTGGTAATGGTCGGGATAGCTCAGCTGGTAGAGCAAA-GGAC
TGAAAATC
>KY927246.1 Aquilaria crassna
CAACCTCCAAAACCCGCTGACGCTCTACCT-ATTTTTTTTTG----ATTTCTACCTATTT
T--TTATCTTACCCTCTCCTTTTGTTAGTGGTTCAAAGTTACTTATC-TTTCCCATTCAT
CCTA--TTCTTTTCCATTTTACAGGCG-TATCCGAGCATCATTTTTTCTCTT-AACACAA
ATATAGGTACAAATCAACATTTTTGAGTAAGGAATACCCATTTGAATGAT--TCAAAATC
ATTACTCAGACTGAAACTTA-CATACAAAGTCGTCCCTTCGAAGATTCTGTCAATTCCCG
--TTCGCT-ACTTTGACTTTTATTTTATTTGAATACTTTTTTTCGTCTTTTTT-------
CAAAATGAGGATGATGTCTTGGTAATGGTCGGGATAGCTCAGCTGGTAGAGCAAA-GGAC
TGAAAATC
>KT726320.1 Aquilaria cumingiana
CAACCTCCAAAACCCGCTGACGCTCTACCG-ATTTTTTTTTT---GATTTCTACCTATTT
T--TTATCTTACCCTCTCCTTTTGTTAGTGGTTCAAAGTTACTTATC-TTTCCCATTCAT
CCTA--TTCTTTTCCATTTTACAGGCG-TATCCGAGCATCATTTTTTCTCTT-AACACAA
ATATAGGTACAAATCAACATTTTTGAGTAAGGAATACCCATTTGAATGAT--TCAAAATC
ATTACTCAGACTGAAACTTA-CATACAAAGTCGTCCCTTCGAAGATTCTGTCAATTCCCG
--TTCGCT-ACTTTGACTTTTATTTTATTTTAATACTTTTTTTCGTCTTTTTT-------
AAAAATGAGGATGATGTCTTGGTAATGGTCGGGATAGCTCAGCTGGTAGAGCAGA-GGAC
TGAAAATC
>KY927233.1 Aquilaria hirta
CAACCTCCAAAACCCGCTGACGCTCTACCT-ATTTTTTTTT----GATTTCTACCTATTT
T--TTATCTTACCCTCTCCTTTTGTTAGTGGTTCAAAGTTACTTATC-TTTCCCATTCAT
CCTA--TTCTTTTCCATTTTACAGGCG-TATCCGAGCATCATTTTTTCTCTT-AACACAA
ATATAGGTACAAATCAACATTTTTGAGTAAGGAATACCCATTTGAATGAT--TCAAAATC
ATTACTCAGACTGAAACTTA-CATACAAAGTCGTCCCTTCGAAGATTCTGTCAATTCCCG
--TTCGCT-ACTTTGACTTTGATTTTATTTTAATACTTTTTTTCGTCTTTTTT-------
AAAAATGAGGATGATGTCTTGGTAATGGTCGGGATAGCTCAGCTGGTAGAGCA-AAGGAC
TGAAAATC
>KT364472.1 Aquilaria hirta
CAACCTCCAAAACCCGCTGACGCTCTACCT-ATTTTTTTTTG----ATTTCTACCTATTT
T--TTATCTTACCCTCTCCTTTTGTTAGTGGTTCAAAGTTACTTATC-TTTCCCATTCAT
CCTA--TTCTTTTCCATTTTACAGGCG-TATCCGAGCATCATTTTTTCTCTT-AACACAA
ATATAGGTACAAATCAACATTTTTGAGTAAGGAATACCCATTTGAATGAT--TCAAAATC
ATTACTCAGACTGAAACTTA-CATACAAAGTCGTCCCTTCGAAGATTCTGTCAATTCCCG
--TTCGCT-ACTTTGACTTTTATTTGATTTTAATACTTTTTTTCGTCTTTTTT-------
AAAAATGAGGATGATGTCTTGGTAATGGTCGGGATAGCTCAGCTGGTAGAGCAGA-GGAC
TGAAAATC
>KU244036.1 Aquilaria hirta
CAACCTCCAAAACCCGCTGACGCTCTACCT-ATTTTTTTTTG----ATTTCTACCTATTT
T--TTATCTTACCCTCTCCTTTTGTTAGTGGTTCAAAGTTACTTATC-TTTCCCATTCAT
CCTA--TTCTTTTCCATTTTACAGGCG-TATCCGAGCATCATTTTTTCTCTT-AACACAA
ATATAGGTACAAATCAACATTTTTGAGTAAGGAATACCCATTTGAATGAT--TCAAAATC
ATTACTCAGACTGAAACTTA-CATACAAAGTCGTCCCTTCGAAGATTCTGTCAATTCCCG
--TTCGCT-ACTTTGACTTTTATTTGATTTTAATACTTTTTTTCGTCTTTTTT-------
AAAAATGAGGATGATGTCTTGGTAATGGTCGGGATAGCACAGCTGGTAGAGCAGAAGGAC
TGAAAATC
>AY216745.1 Aquilaria malaccensis
CAACCTCCAAAACCCGCTGACGCTCTACCT-ATTTTTTTTTG----ATTTCTACCTATTT
T--TTATCTTACCCTCTCCTTTTGTTAGTGGTTCAAAGTTACTTATC-TTTCCCATTCAT
CCTA--TTCTTTTCCATTTTACAGGCG-TATCCGAGCATCATTTTTTCTCTT-AACACAA
ATCTAGGTACAAATCAACATTTTTGAGTAAGGAATACCCATTTGAATGAT--TCAAAATC
ATTACTCAGACTGAAACTTA-CATACAAAGTCGTCCCTTCGAAGATTCTGTCAATTCCCG
--TTCGCT-ACTTTGACTTTTATTTTATTTTAATACTTTTTTTCGTCTTTTTT-------
AAAAATGAGGATGATGTCTTGGTAATGGTCGGGATAGCTCAGCTGGTAGAGCAGA-GGAC
>KY927232.1 Aquilaria malaccensis
CAACCTCCAAAACCCGCTGACGCTCTACCT-ATTTTTTTTTG----ATTTCTACCTATTT
T--TTATCTTACCCTCTCCTTTTGTTAGTGGTTCAAAGTTACTTATC-TTTCCCATTCAT
CCTA--TTCTTTTCCATTTTACAGGCG-TATCCGAGCATCATTTTTTCTCTT-AACACAA
ATCTAGGTACAAATCAACATTTTTGAGTAAGGAATACCCATTTGAATGAT--TCAAAATC
ATTACTCAGACTGAAACTTA-CATACAAAGTCGTCCCTTCGAAGATTCTGTCAATTCCCG
--TTCGCT-ACTTTGACTTTTATTTTATTTTAATACTTTTTTTCGTCTTTTTT-------
AAAAATGAGGATGATGTCTTGGTAATGGTCGGGATAGCTCAGCTGGTAGAGCAAA-GGAC
TGAAAATC
>KY927223.1 Aquilaria malaccensis
CAACCTCCAAAACCCGCTGACGCTCTACCT-ATTTTTTTTTG----ATTTCTACCTATTT
T--TTATCTTACCCTCTCCTTTTGTTAGTGGTTCAAAGTTACTTATC-TTTCCCATTCAT
CCTA--TTCTTTTCCATTTTACAGGCG-TATCCGAGCATCATTTTTTCTCTT-AACACAA
ATCTAGGTACAAATCAACATTTTTGAGTAAGGAATACCCATTTGAATGAT--TCAAAATC
ATTACTCAGACTGAAACTTA-CATACAAAGTCGTCCCTTCGAAGATTCTGTCAATTCCCG
--TTCGCT-ACTTTGACTTTTATTTTATTTTAATACTTTTTTTCGTCTTTTTT-------
AAAAATGAGGATGATGTCTTGGTAATGGTCGGGATAGCTCAGCTGGTAGAGCAAA-GGAC
TGAAAATC
>KY927221.1 Aquilaria malaccensis
CAACCTCCAAAACCCGCTGACGCTCTACCT-ATTTTTTTTTG----ATTTCTACCTATTT
T--TTATCTTACCCTCTCCTTTTGTTAGTGGTTCAAAGTTACTTATC-TTTCCCATTCAT
CCTA--TTCTTTTCCATTTTACAGGCG-TATCCGAGCATCATTTTTTCTCTT-AACACAA
ATCTAGGTACAAATCAACATTTTTGAGTAAGGAATACCCATTTGAATGAT--TCAAAATC
ATTACTCAGACTGAAACTTA-CATACAAAGTCGTCCCTTCGAAGATTCTGTCAATTCCCG
--TTCGCT-ACTTTGACTTTTATTTTATTTTAATACTTTTTTTCGTCTTTTTT-------
AAAAATGAGGATGATGTCTTGGTAATGGTCGGGATAGCTCAGCTGGTAGAGCAAA-GGAC
TGAAAATC
>KU244039.1 Aquilaria malaccensis
CAACCTCCAAAACCCGCTGACGCTCTACCT-ATTTTTTTTTG----ATTTCTACCTATTT
T--TTATCTTACCCTCTCCTTTTGTTAGTGGTTCAAAGTTACTTATC-TTTCCCATTCAT
CCTA--TTCTTTTCCATTTTACAGGCG-TATCCGAGCATCATTTTTTCTCTT-AACACAA
ATCTAGGTACAAATCAACATTTTTGAGTAAGGAATACCCATTTGAATGAT--TCAAAATC
ATTACTCAGACTGAAACTTA-CATACAAAGTCGTCCCTTCGAAGATTCTGTCAATTCCCG
--TTCGCT-ACTTTGACTTTTATTTTATTTTAATACTTTTTTTCGTCTTTTTT-------
AAAAATGAGGATGATGTCTTGGTAATGGTCGGGATAGCACAGCTGGTAGAGCAGA-GGAC
TGAAAATC
>KT726322.1 Aquilaria microcarpa
CAACCTCCAAAACCCGCTGACGCTCTACCT-ATTTTTTTTTG----ATTTCTACCTATTT
T--TTATCTTACCCTCTCCTTTTGTTAGTGGTTCAAAGTTACTTATC-TTTCCCATTCAT
CCTA--TTCTTTTCCATTTTACAGGCG-TATCCGAGCATCATTTTTTCTCTT-AACACAA
ATCTAGGTACAAATCAACATTTTTGAGTAAGGAATACCCATTTGAATGAT--TCAAAATC
ATTACTCAGACTGAAACTTA-CATACAAAGTCGTCCCTTCGAAGATTCTGTCAATTCCCG
--TTCGCT-ACTTTGACTTTTATTTTATTTTAATACTTTTTTTCGTCTTTTTT-------
AAAAATGAGGATGATGTCTTGGTAATGGTCGGGATAGCTCAGCTGGTAGAGCAGA-GGAC
TGAAAATC
>KU244042.1 Aquilaria microcarpa
CAACCTCCAAAACCCGCTGACGCTCTACCT-ATTTTTTTTTG----ATTTCTACCTATTT
T--TTATCTTACCCTCTCCTTTTGTTAGTGGTTCAAAGTTACTTATC-TTTCCCATTCAT
CCTA--TTCTTTTCCATTTTACAGGCG-TATCCGAGCATCATTTTTTCTCTT-AACACAA
ATCTAGGTACAAATCAACATTTTTGAGTAAGGAATACCCATTTGAATGAT--TCAAAATC
ATTACTCAGACTGAAACTTA-CATACAAAGTCGTCCCTTCGAAGATTCTGTCAATTCCCG
--TTCGCT-ACTTTGACTTTTATTTTATTTTAATACTTTTTTTCGTCTTTTTT-------
AAAAATGAGGATGATGTCTTGGTAATGGTCGGGATAGCACAGCTGGTAGAGCAGAAGGAC
TGAAAATC
>MF443430.1 Aquilaria rugosa
CAACCTCCAAAACCCGCTGACGCTCTACCT-ATTTTTTTTTTTTT-ATTTCTACCTATTT
T--TTATCTTACCCTCTCCTTTTGTTAGTGGTTCAAAGTTACTTATC-TTTCCCATTCAT
CCTA--TTCTTTTCCATTTTACAGGCG-TATCCGAGCATCATTTTTTCTCTT-AACACAA
ATATAGGTACAAATCAACATTTTTGAGTAAGGAATACCCATTTGAATGAT--TCAAAATC
ATTACTCAGACTGAAACTTA-CATACAAAGTCGTCCCTTCGAAGATTCTGTCAATTCCCG
--TTCGCT-ACTTTGACTTTGATTTTATTTTAATACTTTTTTTCGTCTTTTTT-------
AAAAATGAGGATGATGTCTTGGTAATGGTCGGGATAGCTCAGCTGGTAGAGCA-GAGGAC
TGAAAATC
>EU652679.1 Aquilaria sinensis
CAACCTCCAAAACCCGCTGGCGCTCTACCT-ATTTTTTTTTTTTG-ATTTCTACCTATTT
T--TTATCTTACCCTCTCCTTTTGTTAGGGGTTCAAAGTTACTTATC-TTTCCCATTCAT
CCTA--TTCTTTTCCATTTTACAGGCG-TATCCGAGCATCATTTTTTCTCTT-AACACAA
ATATAGGTACAAATCAACATTTTTGAGTAAGGAATACCCATTTGAATGAT--TCAAAATC
ATTACTCAAACTGAAACTTA-CATACAAAGTCGTCCCTTCGAAGATTCTGTCAATTCCCG
--TTCGCT-ACTTTGACTTTGATTTTATTTTAATACTTTTTTTCGTCTTTTTT-------
AAAAATGAGGATGATGTCTTGGTAAGGGTCGGGATAGCTCACCTGGTAGAGCA-GAGGAC
TGAAAATC
>EU652672.1 Aquilaria sinensis
CAACCTCCAAAACCCGCTGGCGCTCTACCT-ATTTTTTTTTT--G-ATTTCTACCTATTT
T--TTATCTTACCCTCTCCTTTTGTTAGGGGTTCAAAGTTACTTATC-TTTCCCATTCAT
CCTA--TTCTTTTCCATTTTACAGGCG-TATCCGAGCATCATTTTTTCTCTT-AACACAA
ATATAGGTACAAATCAACATTTTTGAGTAAGGAATACCCATTTGAATGAT--TCAAAATC
ATTACTCAAACTGAAACTTA-CATACAAAGTCGTCCCTTCGAAGATTCTGTCAATTCCCG
--TTCGCT-ACTTTGACTTTGATTTTATTTTAATACTTTTTTTCGTCTTTTTT-------
AAAAATGAGGATGATGTCTTGTTAATGGTCGGGATAGCTCACCTGGTAGAGCA-GAGGAC
TGAAAATC
>EU652674.1 Aquilaria sinensis
CAACCTCCAAAACCCGCTGGCGCTCTACCT-ATTTTTTTTTTT-G-ATTTCTACCTATTT
T--TTATCTTACCCTCTCCTTTTGTTAGGGGTTCAAAGTTACTTATC-TTTCCCATTCAT
CCTA--TTCTTTTCCATTTTACAGGCG-TATCCGAGCATCATTTTTTCTCTT-AACACAA
ATATAGGTACAAATCAACATTTTTGAGTAAGGAATACCCATTTGAATGAT--TCAAAATC
ATTACTCAAACTGAAACTTA-CATACAAAGTCGTCCCTTCGAAGATTCTGTCAATTCCCG
--TTCGCT-ACTTTGACTTTGATTTTATTTTAATACTTTTTTTCGTCTTTTTT-------
AAAAATGAGGATGATGTCTTGGTAATGGTCGGGATACCTCACCTGGTAGAGCA-GAGGAC
TGAAAATC
>KT148967.1 Aquilaria sinensis
CAACCTCCAAAACCCGCTGACGCTCTACCT-ATTTTTTTTTTTTG-ATTTCTACCTATTT
T--TTATCTTACCCTCTCCTTTTGTTAGTGGTTCAAAGTTACTTATC-TTTCCCATTCAT
CCTA--TTCTTTTCCATTTTACAGGCG-TATCCGAGCATCATTTTTTCTCTT-AACACAA
ATATAGGTACAAATCAACATTTTTGAGTAAGGAATACCCATTTGAATGAT--TCAAAATC
ATTACTCAGACTGAAACTTA-CATACAAAGTCGTCCCTTCGAAGATTCTGTCAATTCCCG
--TTCGCT-ACTTTGACTTTGATTTTATTTTAATACTTTTTTTCGTCTTTTTT-------
AAAAATGAGGATGATGTCTTGGTAATGGTCGGGATAGCTCAGCTGGTAGAGCA-GAGGAC
TGAAAATC
>EU652677.1 Aquilaria sinensis
CAACCTCCAAAACCCGCTGACGCTCTACCT-ATTTTTTTTTT--G-ATTTCTACCTATTT
T--TTATCTTACCCTCTCCTTTTGTTAGTGGTTCAAAGTTACTTATC-TTTCCCATTCAT
CCTA--TTCTTTTCCATTTTACAGGCG-TATCCGAGCATCATTTTTTCTCTT-AACACAA
ATATAGGTACAAATCAACATTTTTGAGTAAGGAATACCCATTTGAATGAT--TCAAAATC
ATTACTCAGACTGAAACTTA-CATACAAAGTCGTCCCTTCGAAGATTCTGTCAATTCCCG
--TTCGCT-A-TTTGACTTTGATTTTATTTTAATACTTTTTTTCGTCTTTTTT-------
AAAAATGAGGATGATGTCTTGGTAATGGTCGGGATAGCTCACCTGGTAGAGCA-GAGGAC
TGAAAATC
>KY927247.1 Aquilaria sinensis
CAACCTCCAAAACCCGCTGACGCTCTACCT-ATTTTTTTT---T-GATTTCTACCTATTT
T--TTATCTTACCCTCTCCTTTTGTTAGTGGTTCAAAGTTACTTATC-TTTCCCATTCAT
CCTA--TTCTTTTCCATTTTACAGGCG-TATCCGAGCATCATTTTTTCTCTT-AACACAA
ATATAGGTACAAATCAACATTTTTGAGTAAGGAATACCCATTTGAATGAT--TCAAAATC
ATTACTCAGACTGAAACTTA-CATACAAAGTCGTCCCTTCGAAGATTCTGTCAATTCCCG
--TTCGCT-ACTTTGACTTTGATTTTATTTTAATACTTTTTTTCGTCTTTTTT-------
AAAAATGAGGATGATGTCTTGGTAATGGTCGGGATAGCTCAGCTGGTAGAGCA-AAGGAC
TGAAAATC
>KU238026.1 Aquilaria sinensis
CAACCTCCAAAACCCGCTGACGCTCTACCT-ATTTTTTTTTTTTTGATTTCTACCTATTT
T--TTATCTTACCCTCTCCTTTTGTTAGTGGTTCAAAGTTACTTATC-TTTCCCATTCAT
CCTA--TTCTTTTCCATTTTACAGGCG-TATCCGAGCATCATTTTTTCTCTT-AACACAA
ATATAGGTACAAATCAACATTTTTGAGTAAGGAATACCCATTTGAATGAT--TCAAAATC
ATTACTCAGACTGAAACTTA-CATACAAAGTCGTCCCTTCGAAGATTCTGTCAATTCCCG
--TTCGCT-ACTTTGACTTTGATTTTATTTTAATACTTTTTTTCGTCTTTTTT-------
AAAAATGAGGATGATGTCTTGGAAATGGTCGGGATAGCTCAGCTGGTAGAGCAGA-GGAC
TGAAAATC
>AY216749.1 Aquilaria sinensis
CAACCTCCAAAACCCGCTGACGCTCTACCG-ATTTTTTTT-----GATTTCTACCTATTT
T--TTATCTTACCCTCTCCTTTAGGTAGTGGGTCAAAGTDACTTATC-TTTCCCATTCAT
CCTA--TTCTTTTCCATTTTACAGGCG-TATCCGAGCATCATTTTTTCTCTT-AACACAA
ATATAGGTACAAATCAACATTTTTGAGTAAGGAATACCCATTTGAATGAT--TCAAAATC
ATTACTCAGACTGAAACTTA-CATACAAAGTCGTCCCTTCGAAGATTCTGTCAATTCCCG
--TTCGCT-ACTTTGACTTTGATTTTATTTTAATACTTTTTTTCGTCTTTTTT-------
AAAAATGAGGATGATGTCTTGGTAATGGTCGGGATAGCTCACCTGGTA------------
--------
>KF018041.1 Aquilaria sinensis
CAACCTCCAAAACCCGCTGACGCTCTACCT-ATTTTTTTTTTTTTGATTTCTACCTATTT
T--TTATCTTACCCTCTCCTTTTGTTAGTGGTTCAAAGTTACTTATC-TTTCCCATTCAT
CCTA--TTCTTTTCCATTTTACAGGCG-TATCCGAGCATCATTTTTTCTCTT-AACACAA
ATATAGGTACAAATCAACATTTTTGAGTAAGGAATACCCATTTGAATGAT--TCAAAATC
ATTACTCAGACTGAAACTTA-CATACAAAGTCGTCCCTTCGAAGATTCTGTCAATTCCCG
--TTCGCT-ACTTTGACTTTGATTTTATTTTAATACTTTTTTTCGTCTTTTTT-------
AAAAATGAGGATGATGTCTTGGTAATGGTCGGGATAGCACAGCTGGTAGAGCAGA-----
>MG656407.1 Aquilaria yunnanensis
CAACCTCCAAAACCCGCTGACGCTCTACCT-ATTTTTTTTTTTTG-ATTTCTACCTATTT
T--TTATCTTACCCTCTCCTTTTGTTAGTGGTTCAAAGTTACTTATC-TTTCCCATTCAT
CCTA--TTCTTTTCCATTTTACAGGCG-TATCCGAGCATCATTTTTTCTCTT-AACACAA
ATATAGGTACAAATCAACATTTTTGAGTAAGGAATACCCATTTGAATGAT--TCAAAATC
ATTACTCAGACTGAAACTTA-CATACAAAGTCGTCCCTTCGAAGATTCTGTCAATTCCCG
--TTCGCT-ACTTTGACTTTGATTTTATTTTAATACTTTTTTTCGTCTTTTTT-------
AAAAATGAGGATGATGTCTTGGTAATGGTCGGGATAGCTCAGCTGGTAGAGCA-GAGGAC
TGAAAATC
>EU652681.1 Aquilaria yunnanensis
CAACCTCCAAAACCCGCTGGCGCTTTACCT-ATTTTTTTTTTT-G-ATTTCTACCTATTT
T--TTATCTTACCCTCTCCTTTTGTTAGTGGTTCAAAGTTACTTATC-TTTCCCATTCAT
CCTA--TTCTTTTCCATTTTACAGGGG-TATCCGAGCATCATTTTTTCTCTT-AACACAA
ATATAGGTACAAATCAACATTTTTGAGTAAGGAATACCCATTTGAATGAT--TCAAAATC
ATTACTCAGACTGAAACTTA-CATACAAAGTCGTCCCTTGGAAGATTCTGTCAATTCCCG
--TTCGCT-ACTTTGACTTTGATTTTATTTTAATACTTTTTTTCGTCTTTTTT-------
AAAAATGAGGATGATGTCTTGGTAATGGTCGGGATAGCTCACCTGGTAGAGCA-GAGGAC
TGAAAATC
>KY927252.1 Aquilaria yunnanensis
CAACCTCCAAAACCCGCTGACGCTCTACCT-ATTTTTTTTTTTT-GATTTCTACCTATTT
T--TTATCTTACCCTCTCCTTTTGTTAGTGGTTCAAAGTTACTTATC-TTTCCCATTCAT
CCTA--TTCTTTTCCATTTTACAGGCG-TATCCGAGCATCATTTTTTCTCTT-AACACAA
ATATAGGTACAAATCAACATTTTTGAGTAAGGAATACCCATTTGAATGAT--TCAAAATC
ATTACTCAGACTGAAACTTA-CATACAAAGTCGTCCCTTCGAAGATTCTGTCAATTCCCG
--TTCGCT-ACTTTGACTTTGATTTTATTTTAATACTTTTTTTCGTCTTTTTT-------
AAAAATGAGGATGATGTCTTGGTAATGGTCGGGATAGCTCAGCTGGAAGAGCA-AAGGAC
TGAAAATC
>GU736359.1 Daphne mezereum OUT
GCATATCTAAAGGTAATAAAAAAACTATCTCAAAAAAAAAAAAGATATAAATACGGGTTT
GGGTTGTCTTTTTTTTTTTTTTCTGAAAAATAGAAAGAATTGTTGTGAATTCGTATTGAT
TCCAAATTGAAGAAAGAATCAAATACAACATTCATACAACATTCATTAAT---AAAATAA
TTTACCCCATAGTTTGATAAATCTTTTGAACAACTGGTTAATCGGACGAGAATAAAGATA
GAGTCCCATTCTACATGTCAATATAAATGCTGACAACAATGAAATTTATAGTAAGAGGAA
AATCCGTCGACTTTTAAAATGGGGAGGGTTCAAGTCCCTCTATCCCCAACCCCCAAAACC
CGTTGACGCCCTACCTGTTTTTTTTTTTCTTTTTAATTGACATAGACGCCAGTCCTCTAT
TAAAATGAGGATGATGTCTTGGTAATGGTCGGGA--------------------------

## Sheet: Table S6
Table S6. Genetic distance calculation results based on ITS DNA molecular markers among different Aquilaria species.
Species 1	Species 2	Genetic distance	Std. Err
MH134137.1 Aquilaria agallochum internal transcribed spacer 1 partial sequence 5.8S ribosomal RNA gene complete sequence and internal transcribed spacer 2 partial sequence_{aga}	KU879012.1 Aquilaria agallochum 18S ribosomal RNA gene partial sequence internal transcribed spacer 1 5.8S ribosomal RNA gene and internal transcribed spacer 2 complete sequence and 28S ribosomal RNA gene partial sequence_{aga}	0.00546454	0.00365018
MH134137.1 Aquilaria agallochum internal transcribed spacer 1 partial sequence 5.8S ribosomal RNA gene complete sequence and internal transcribed spacer 2 partial sequence_{aga}	MH134138.1 Aquilaria beccariana internal transcribed spacer 1 partial sequence 5.8S ribosomal RNA gene complete sequence and internal transcribed spacer 2 partial sequence_{aga}	0.00545707	0.00395438
KU879012.1 Aquilaria agallochum 18S ribosomal RNA gene partial sequence internal transcribed spacer 1 5.8S ribosomal RNA gene and internal transcribed spacer 2 complete sequence and 28S ribosomal RNA gene partial sequence_{aga}	MH134138.1 Aquilaria beccariana internal transcribed spacer 1 partial sequence 5.8S ribosomal RNA gene complete sequence and internal transcribed spacer 2 partial sequence_{aga}	0.0109516	0.00537349
MH134137.1 Aquilaria agallochum internal transcribed spacer 1 partial sequence 5.8S ribosomal RNA gene complete sequence and internal transcribed spacer 2 partial sequence_{aga}	KT779116.1 Aquilaria beccariana voucher FBL04001 internal transcribed spacer 1 partial sequence 5.8S ribosomal RNA gene complete sequence and internal transcribed spacer 2 partial sequence_{aga}	0.0249581	0.00802035
KU879012.1 Aquilaria agallochum 18S ribosomal RNA gene partial sequence internal transcribed spacer 1 5.8S ribosomal RNA gene and internal transcribed spacer 2 complete sequence and 28S ribosomal RNA gene partial sequence_{aga}	KT779116.1 Aquilaria beccariana voucher FBL04001 internal transcribed spacer 1 partial sequence 5.8S ribosomal RNA gene complete sequence and internal transcribed spacer 2 partial sequence_{aga}	0.0306725	0.00908761
MH134138.1 Aquilaria beccariana internal transcribed spacer 1 partial sequence 5.8S ribosomal RNA gene complete sequence and internal transcribed spacer 2 partial sequence_{aga}	KT779116.1 Aquilaria beccariana voucher FBL04001 internal transcribed spacer 1 partial sequence 5.8S ribosomal RNA gene complete sequence and internal transcribed spacer 2 partial sequence_{aga}	0.0249581	0.00791269
MH134137.1 Aquilaria agallochum internal transcribed spacer 1 partial sequence 5.8S ribosomal RNA gene complete sequence and internal transcribed spacer 2 partial sequence_{aga}	KT364477.1 Aquilaria beccariana voucher SFN29381 internal transcribed spacer 1 partial sequence 5.8S ribosomal RNA gene complete sequence and internal transcribed spacer 2 partial sequence_{aga}	0.00547011	0.00373822
KU879012.1 Aquilaria agallochum 18S ribosomal RNA gene partial sequence internal transcribed spacer 1 5.8S ribosomal RNA gene and internal transcribed spacer 2 complete sequence and 28S ribosomal RNA gene partial sequence_{aga}	KT364477.1 Aquilaria beccariana voucher SFN29381 internal transcribed spacer 1 partial sequence 5.8S ribosomal RNA gene complete sequence and internal transcribed spacer 2 partial sequence_{aga}	0.010995	0.00508924
MH134138.1 Aquilaria beccariana internal transcribed spacer 1 partial sequence 5.8S ribosomal RNA gene complete sequence and internal transcribed spacer 2 partial sequence_{aga}	KT364477.1 Aquilaria beccariana voucher SFN29381 internal transcribed spacer 1 partial sequence 5.8S ribosomal RNA gene complete sequence and internal transcribed spacer 2 partial sequence_{aga}	0.00547011	0.00391491
KT779116.1 Aquilaria beccariana voucher FBL04001 internal transcribed spacer 1 partial sequence 5.8S ribosomal RNA gene complete sequence and internal transcribed spacer 2 partial sequence_{aga}	KT364477.1 Aquilaria beccariana voucher SFN29381 internal transcribed spacer 1 partial sequence 5.8S ribosomal RNA gene complete sequence and internal transcribed spacer 2 partial sequence_{aga}	0.0250805	0.00792221
MH134137.1 Aquilaria agallochum internal transcribed spacer 1 partial sequence 5.8S ribosomal RNA gene complete sequence and internal transcribed spacer 2 partial sequence_{aga}	KX351419.1 Aquilaria beccariana voucher S1 5.8S ribosomal RNA gene partial sequence internal transcribed spacer 2 complete sequence and large subunit ribosomal RNA gene partial sequence_{aga}	0.0196417	0.00708983
KU879012.1 Aquilaria agallochum 18S ribosomal RNA gene partial sequence internal transcribed spacer 1 5.8S ribosomal RNA gene and internal transcribed spacer 2 complete sequence and 28S ribosomal RNA gene partial sequence_{aga}	KX351419.1 Aquilaria beccariana voucher S1 5.8S ribosomal RNA gene partial sequence internal transcribed spacer 2 complete sequence and large subunit ribosomal RNA gene partial sequence_{aga}	0.0263532	0.00858632
MH134138.1 Aquilaria beccariana internal transcribed spacer 1 partial sequence 5.8S ribosomal RNA gene complete sequence and internal transcribed spacer 2 partial sequence_{aga}	KX351419.1 Aquilaria beccariana voucher S1 5.8S ribosomal RNA gene partial sequence internal transcribed spacer 2 complete sequence and large subunit ribosomal RNA gene partial sequence_{aga}	0.0229505	0.00782382
KT779116.1 Aquilaria beccariana voucher FBL04001 internal transcribed spacer 1 partial sequence 5.8S ribosomal RNA gene complete sequence and internal transcribed spacer 2 partial sequence_{aga}	KX351419.1 Aquilaria beccariana voucher S1 5.8S ribosomal RNA gene partial sequence internal transcribed spacer 2 complete sequence and large subunit ribosomal RNA gene partial sequence_{aga}	0.0469277	0.0114857
KT364477.1 Aquilaria beccariana voucher SFN29381 internal transcribed spacer 1 partial sequence 5.8S ribosomal RNA gene complete sequence and internal transcribed spacer 2 partial sequence_{aga}	KX351419.1 Aquilaria beccariana voucher S1 5.8S ribosomal RNA gene partial sequence internal transcribed spacer 2 complete sequence and large subunit ribosomal RNA gene partial sequence_{aga}	0.0229862	0.00782259
MH134137.1 Aquilaria agallochum internal transcribed spacer 1 partial sequence 5.8S ribosomal RNA gene complete sequence and internal transcribed spacer 2 partial sequence_{aga}	KX424704.1 Aquilaria beccariana 5.8S ribosomal RNA gene partial sequence internal transcribed spacer 2 complete sequence and 28S ribosomal RNA gene partial sequence_{aga}	0.026681	0.00892477
KU879012.1 Aquilaria agallochum 18S ribosomal RNA gene partial sequence internal transcribed spacer 1 5.8S ribosomal RNA gene and internal transcribed spacer 2 complete sequence and 28S ribosomal RNA gene partial sequence_{aga}	KX424704.1 Aquilaria beccariana 5.8S ribosomal RNA gene partial sequence internal transcribed spacer 2 complete sequence and 28S ribosomal RNA gene partial sequence_{aga}	0.0335776	0.0103416
MH134138.1 Aquilaria beccariana internal transcribed spacer 1 partial sequence 5.8S ribosomal RNA gene complete sequence and internal transcribed spacer 2 partial sequence_{aga}	KX424704.1 Aquilaria beccariana 5.8S ribosomal RNA gene partial sequence internal transcribed spacer 2 complete sequence and 28S ribosomal RNA gene partial sequence_{aga}	0.030041	0.00950935
KT779116.1 Aquilaria beccariana voucher FBL04001 internal transcribed spacer 1 partial sequence 5.8S ribosomal RNA gene complete sequence and internal transcribed spacer 2 partial sequence_{aga}	KX424704.1 Aquilaria beccariana 5.8S ribosomal RNA gene partial sequence internal transcribed spacer 2 complete sequence and 28S ribosomal RNA gene partial sequence_{aga}	0	0
KT364477.1 Aquilaria beccariana voucher SFN29381 internal transcribed spacer 1 partial sequence 5.8S ribosomal RNA gene complete sequence and internal transcribed spacer 2 partial sequence_{aga}	KX424704.1 Aquilaria beccariana 5.8S ribosomal RNA gene partial sequence internal transcribed spacer 2 complete sequence and 28S ribosomal RNA gene partial sequence_{aga}	0.0301174	0.00952114
KX351419.1 Aquilaria beccariana voucher S1 5.8S ribosomal RNA gene partial sequence internal transcribed spacer 2 complete sequence and large subunit ribosomal RNA gene partial sequence_{aga}	KX424704.1 Aquilaria beccariana 5.8S ribosomal RNA gene partial sequence internal transcribed spacer 2 complete sequence and 28S ribosomal RNA gene partial sequence_{aga}	0.0440198	0.0111076
MH134137.1 Aquilaria agallochum internal transcribed spacer 1 partial sequence 5.8S ribosomal RNA gene complete sequence and internal transcribed spacer 2 partial sequence_{aga}	KU238038.1 Aquilaria crassna voucher FBL G11 WC3 internal transcribed spacer 2 partial sequence	0.0165072	0.0059524
KU879012.1 Aquilaria agallochum 18S ribosomal RNA gene partial sequence internal transcribed spacer 1 5.8S ribosomal RNA gene and internal transcribed spacer 2 complete sequence and 28S ribosomal RNA gene partial sequence_{aga}	KU238038.1 Aquilaria crassna voucher FBL G11 WC3 internal transcribed spacer 2 partial sequence	0.0221253	0.00719082
MH134138.1 Aquilaria beccariana internal transcribed spacer 1 partial sequence 5.8S ribosomal RNA gene complete sequence and internal transcribed spacer 2 partial sequence_{aga}	KU238038.1 Aquilaria crassna voucher FBL G11 WC3 internal transcribed spacer 2 partial sequence	0.0220708	0.00727399
KT779116.1 Aquilaria beccariana voucher FBL04001 internal transcribed spacer 1 partial sequence 5.8S ribosomal RNA gene complete sequence and internal transcribed spacer 2 partial sequence_{aga}	KU238038.1 Aquilaria crassna voucher FBL G11 WC3 internal transcribed spacer 2 partial sequence	0.0421308	0.0101917
KT364477.1 Aquilaria beccariana voucher SFN29381 internal transcribed spacer 1 partial sequence 5.8S ribosomal RNA gene complete sequence and internal transcribed spacer 2 partial sequence_{aga}	KU238038.1 Aquilaria crassna voucher FBL G11 WC3 internal transcribed spacer 2 partial sequence	0.0221534	0.00722737
KX351419.1 Aquilaria beccariana voucher S1 5.8S ribosomal RNA gene partial sequence internal transcribed spacer 2 complete sequence and large subunit ribosomal RNA gene partial sequence_{aga}	KU238038.1 Aquilaria crassna voucher FBL G11 WC3 internal transcribed spacer 2 partial sequence	0	0
KX424704.1 Aquilaria beccariana 5.8S ribosomal RNA gene partial sequence internal transcribed spacer 2 complete sequence and 28S ribosomal RNA gene partial sequence_{aga}	KU238038.1 Aquilaria crassna voucher FBL G11 WC3 internal transcribed spacer 2 partial sequence	0.0438711	0.011062
MH134137.1 Aquilaria agallochum internal transcribed spacer 1 partial sequence 5.8S ribosomal RNA gene complete sequence and internal transcribed spacer 2 partial sequence_{aga}	MH134139.1 Aquilaria crassna internal transcribed spacer 1 partial sequence 5.8S ribosomal RNA gene complete sequence and internal transcribed spacer 2 partial sequence	0.0165072	0.0059524
KU879012.1 Aquilaria agallochum 18S ribosomal RNA gene partial sequence internal transcribed spacer 1 5.8S ribosomal RNA gene and internal transcribed spacer 2 complete sequence and 28S ribosomal RNA gene partial sequence_{aga}	MH134139.1 Aquilaria crassna internal transcribed spacer 1 partial sequence 5.8S ribosomal RNA gene complete sequence and internal transcribed spacer 2 partial sequence	0.0221253	0.00719082
MH134138.1 Aquilaria beccariana internal transcribed spacer 1 partial sequence 5.8S ribosomal RNA gene complete sequence and internal transcribed spacer 2 partial sequence_{aga}	MH134139.1 Aquilaria crassna internal transcribed spacer 1 partial sequence 5.8S ribosomal RNA gene complete sequence and internal transcribed spacer 2 partial sequence	0.0220708	0.00727399
KT779116.1 Aquilaria beccariana voucher FBL04001 internal transcribed spacer 1 partial sequence 5.8S ribosomal RNA gene complete sequence and internal transcribed spacer 2 partial sequence_{aga}	MH134139.1 Aquilaria crassna internal transcribed spacer 1 partial sequence 5.8S ribosomal RNA gene complete sequence and internal transcribed spacer 2 partial sequence	0.0421308	0.0101917
KT364477.1 Aquilaria beccariana voucher SFN29381 internal transcribed spacer 1 partial sequence 5.8S ribosomal RNA gene complete sequence and internal transcribed spacer 2 partial sequence_{aga}	MH134139.1 Aquilaria crassna internal transcribed spacer 1 partial sequence 5.8S ribosomal RNA gene complete sequence and internal transcribed spacer 2 partial sequence	0.0221534	0.00722737
KX351419.1 Aquilaria beccariana voucher S1 5.8S ribosomal RNA gene partial sequence internal transcribed spacer 2 complete sequence and large subunit ribosomal RNA gene partial sequence_{aga}	MH134139.1 Aquilaria crassna internal transcribed spacer 1 partial sequence 5.8S ribosomal RNA gene complete sequence and internal transcribed spacer 2 partial sequence	0	0
KX424704.1 Aquilaria beccariana 5.8S ribosomal RNA gene partial sequence internal transcribed spacer 2 complete sequence and 28S ribosomal RNA gene partial sequence_{aga}	MH134139.1 Aquilaria crassna internal transcribed spacer 1 partial sequence 5.8S ribosomal RNA gene complete sequence and internal transcribed spacer 2 partial sequence	0.0438711	0.011062
KU238038.1 Aquilaria crassna voucher FBL G11 WC3 internal transcribed spacer 2 partial sequence	MH134139.1 Aquilaria crassna internal transcribed spacer 1 partial sequence 5.8S ribosomal RNA gene complete sequence and internal transcribed spacer 2 partial sequence	0	0
MH134137.1 Aquilaria agallochum internal transcribed spacer 1 partial sequence 5.8S ribosomal RNA gene complete sequence and internal transcribed spacer 2 partial sequence_{aga}	KU244111.1 Aquilaria crassna voucher FBL01017 internal transcribed spacer 2 partial sequence	0.0165072	0.0059524
KU879012.1 Aquilaria agallochum 18S ribosomal RNA gene partial sequence internal transcribed spacer 1 5.8S ribosomal RNA gene and internal transcribed spacer 2 complete sequence and 28S ribosomal RNA gene partial sequence_{aga}	KU244111.1 Aquilaria crassna voucher FBL01017 internal transcribed spacer 2 partial sequence	0.0221253	0.00719082
MH134138.1 Aquilaria beccariana internal transcribed spacer 1 partial sequence 5.8S ribosomal RNA gene complete sequence and internal transcribed spacer 2 partial sequence_{aga}	KU244111.1 Aquilaria crassna voucher FBL01017 internal transcribed spacer 2 partial sequence	0.0220708	0.00727399
KT779116.1 Aquilaria beccariana voucher FBL04001 internal transcribed spacer 1 partial sequence 5.8S ribosomal RNA gene complete sequence and internal transcribed spacer 2 partial sequence_{aga}	KU244111.1 Aquilaria crassna voucher FBL01017 internal transcribed spacer 2 partial sequence	0.0421308	0.0101917
KT364477.1 Aquilaria beccariana voucher SFN29381 internal transcribed spacer 1 partial sequence 5.8S ribosomal RNA gene complete sequence and internal transcribed spacer 2 partial sequence_{aga}	KU244111.1 Aquilaria crassna voucher FBL01017 internal transcribed spacer 2 partial sequence	0.0221534	0.00722737
KX351419.1 Aquilaria beccariana voucher S1 5.8S ribosomal RNA gene partial sequence internal transcribed spacer 2 complete sequence and large subunit ribosomal RNA gene partial sequence_{aga}	KU244111.1 Aquilaria crassna voucher FBL01017 internal transcribed spacer 2 partial sequence	0	0
KX424704.1 Aquilaria beccariana 5.8S ribosomal RNA gene partial sequence internal transcribed spacer 2 complete sequence and 28S ribosomal RNA gene partial sequence_{aga}	KU244111.1 Aquilaria crassna voucher FBL01017 internal transcribed spacer 2 partial sequence	0.0438711	0.011062
KU238038.1 Aquilaria crassna voucher FBL G11 WC3 internal transcribed spacer 2 partial sequence	KU244111.1 Aquilaria crassna voucher FBL01017 internal transcribed spacer 2 partial sequence	0	0
MH134139.1 Aquilaria crassna internal transcribed spacer 1 partial sequence 5.8S ribosomal RNA gene complete sequence and internal transcribed spacer 2 partial sequence	KU244111.1 Aquilaria crassna voucher FBL01017 internal transcribed spacer 2 partial sequence	0	0
MH134137.1 Aquilaria agallochum internal transcribed spacer 1 partial sequence 5.8S ribosomal RNA gene complete sequence and internal transcribed spacer 2 partial sequence_{aga}	KU244110.1 Aquilaria crassna voucher FBL01014 internal transcribed spacer 2 partial sequence	0.0165072	0.0059524
KU879012.1 Aquilaria agallochum 18S ribosomal RNA gene partial sequence internal transcribed spacer 1 5.8S ribosomal RNA gene and internal transcribed spacer 2 complete sequence and 28S ribosomal RNA gene partial sequence_{aga}	KU244110.1 Aquilaria crassna voucher FBL01014 internal transcribed spacer 2 partial sequence	0.0221253	0.00719082
MH134138.1 Aquilaria beccariana internal transcribed spacer 1 partial sequence 5.8S ribosomal RNA gene complete sequence and internal transcribed spacer 2 partial sequence_{aga}	KU244110.1 Aquilaria crassna voucher FBL01014 internal transcribed spacer 2 partial sequence	0.0220708	0.00727399
KT779116.1 Aquilaria beccariana voucher FBL04001 internal transcribed spacer 1 partial sequence 5.8S ribosomal RNA gene complete sequence and internal transcribed spacer 2 partial sequence_{aga}	KU244110.1 Aquilaria crassna voucher FBL01014 internal transcribed spacer 2 partial sequence	0.0421308	0.0101917
KT364477.1 Aquilaria beccariana voucher SFN29381 internal transcribed spacer 1 partial sequence 5.8S ribosomal RNA gene complete sequence and internal transcribed spacer 2 partial sequence_{aga}	KU244110.1 Aquilaria crassna voucher FBL01014 internal transcribed spacer 2 partial sequence	0.0221534	0.00722737
KX351419.1 Aquilaria beccariana voucher S1 5.8S ribosomal RNA gene partial sequence internal transcribed spacer 2 complete sequence and large subunit ribosomal RNA gene partial sequence_{aga}	KU244110.1 Aquilaria crassna voucher FBL01014 internal transcribed spacer 2 partial sequence	0	0
KX424704.1 Aquilaria beccariana 5.8S ribosomal RNA gene partial sequence internal transcribed spacer 2 complete sequence and 28S ribosomal RNA gene partial sequence_{aga}	KU244110.1 Aquilaria crassna voucher FBL01014 internal transcribed spacer 2 partial sequence	0.0438711	0.011062
KU238038.1 Aquilaria crassna voucher FBL G11 WC3 internal transcribed spacer 2 partial sequence	KU244110.1 Aquilaria crassna voucher FBL01014 internal transcribed spacer 2 partial sequence	0	0
MH134139.1 Aquilaria crassna internal transcribed spacer 1 partial sequence 5.8S ribosomal RNA gene complete sequence and internal transcribed spacer 2 partial sequence	KU244110.1 Aquilaria crassna voucher FBL01014 internal transcribed spacer 2 partial sequence	0	0
KU244111.1 Aquilaria crassna voucher FBL01017 internal transcribed spacer 2 partial sequence	KU244110.1 Aquilaria crassna voucher FBL01014 internal transcribed spacer 2 partial sequence	0	0
MH134137.1 Aquilaria agallochum internal transcribed spacer 1 partial sequence 5.8S ribosomal RNA gene complete sequence and internal transcribed spacer 2 partial sequence_{aga}	KU244109.1 Aquilaria crassna voucher FBL01013 internal transcribed spacer 2 partial sequence	0.0165072	0.0059524
KU879012.1 Aquilaria agallochum 18S ribosomal RNA gene partial sequence internal transcribed spacer 1 5.8S ribosomal RNA gene and internal transcribed spacer 2 complete sequence and 28S ribosomal RNA gene partial sequence_{aga}	KU244109.1 Aquilaria crassna voucher FBL01013 internal transcribed spacer 2 partial sequence	0.0221253	0.00719082
MH134138.1 Aquilaria beccariana internal transcribed spacer 1 partial sequence 5.8S ribosomal RNA gene complete sequence and internal transcribed spacer 2 partial sequence_{aga}	KU244109.1 Aquilaria crassna voucher FBL01013 internal transcribed spacer 2 partial sequence	0.0220708	0.00727399
KT779116.1 Aquilaria beccariana voucher FBL04001 internal transcribed spacer 1 partial sequence 5.8S ribosomal RNA gene complete sequence and internal transcribed spacer 2 partial sequence_{aga}	KU244109.1 Aquilaria crassna voucher FBL01013 internal transcribed spacer 2 partial sequence	0.0421308	0.0101917
KT364477.1 Aquilaria beccariana voucher SFN29381 internal transcribed spacer 1 partial sequence 5.8S ribosomal RNA gene complete sequence and internal transcribed spacer 2 partial sequence_{aga}	KU244109.1 Aquilaria crassna voucher FBL01013 internal transcribed spacer 2 partial sequence	0.0221534	0.00722737
KX351419.1 Aquilaria beccariana voucher S1 5.8S ribosomal RNA gene partial sequence internal transcribed spacer 2 complete sequence and large subunit ribosomal RNA gene partial sequence_{aga}	KU244109.1 Aquilaria crassna voucher FBL01013 internal transcribed spacer 2 partial sequence	0	0
KX424704.1 Aquilaria beccariana 5.8S ribosomal RNA gene partial sequence internal transcribed spacer 2 complete sequence and 28S ribosomal RNA gene partial sequence_{aga}	KU244109.1 Aquilaria crassna voucher FBL01013 internal transcribed spacer 2 partial sequence	0.0438711	0.011062
KU238038.1 Aquilaria crassna voucher FBL G11 WC3 internal transcribed spacer 2 partial sequence	KU244109.1 Aquilaria crassna voucher FBL01013 internal transcribed spacer 2 partial sequence	0	0
MH134139.1 Aquilaria crassna internal transcribed spacer 1 partial sequence 5.8S ribosomal RNA gene complete sequence and internal transcribed spacer 2 partial sequence	KU244109.1 Aquilaria crassna voucher FBL01013 internal transcribed spacer 2 partial sequence	0	0
KU244111.1 Aquilaria crassna voucher FBL01017 internal transcribed spacer 2 partial sequence	KU244109.1 Aquilaria crassna voucher FBL01013 internal transcribed spacer 2 partial sequence	0	0
KU244110.1 Aquilaria crassna voucher FBL01014 internal transcribed spacer 2 partial sequence	KU244109.1 Aquilaria crassna voucher FBL01013 internal transcribed spacer 2 partial sequence	0	0
MH134137.1 Aquilaria agallochum internal transcribed spacer 1 partial sequence 5.8S ribosomal RNA gene complete sequence and internal transcribed spacer 2 partial sequence_{aga}	KU244108.1 Aquilaria crassna voucher FBL01012 internal transcribed spacer 2 partial sequence	0.0165072	0.0059524
KU879012.1 Aquilaria agallochum 18S ribosomal RNA gene partial sequence internal transcribed spacer 1 5.8S ribosomal RNA gene and internal transcribed spacer 2 complete sequence and 28S ribosomal RNA gene partial sequence_{aga}	KU244108.1 Aquilaria crassna voucher FBL01012 internal transcribed spacer 2 partial sequence	0.0221253	0.00719082
MH134138.1 Aquilaria beccariana internal transcribed spacer 1 partial sequence 5.8S ribosomal RNA gene complete sequence and internal transcribed spacer 2 partial sequence_{aga}	KU244108.1 Aquilaria crassna voucher FBL01012 internal transcribed spacer 2 partial sequence	0.0220708	0.00727399
KT779116.1 Aquilaria beccariana voucher FBL04001 internal transcribed spacer 1 partial sequence 5.8S ribosomal RNA gene complete sequence and internal transcribed spacer 2 partial sequence_{aga}	KU244108.1 Aquilaria crassna voucher FBL01012 internal transcribed spacer 2 partial sequence	0.0421308	0.0101917
KT364477.1 Aquilaria beccariana voucher SFN29381 internal transcribed spacer 1 partial sequence 5.8S ribosomal RNA gene complete sequence and internal transcribed spacer 2 partial sequence_{aga}	KU244108.1 Aquilaria crassna voucher FBL01012 internal transcribed spacer 2 partial sequence	0.0221534	0.00722737
KX351419.1 Aquilaria beccariana voucher S1 5.8S ribosomal RNA gene partial sequence internal transcribed spacer 2 complete sequence and large subunit ribosomal RNA gene partial sequence_{aga}	KU244108.1 Aquilaria crassna voucher FBL01012 internal transcribed spacer 2 partial sequence	0	0
KX424704.1 Aquilaria beccariana 5.8S ribosomal RNA gene partial sequence internal transcribed spacer 2 complete sequence and 28S ribosomal RNA gene partial sequence_{aga}	KU244108.1 Aquilaria crassna voucher FBL01012 internal transcribed spacer 2 partial sequence	0.0438711	0.011062
KU238038.1 Aquilaria crassna voucher FBL G11 WC3 internal transcribed spacer 2 partial sequence	KU244108.1 Aquilaria crassna voucher FBL01012 internal transcribed spacer 2 partial sequence	0	0
MH134139.1 Aquilaria crassna internal transcribed spacer 1 partial sequence 5.8S ribosomal RNA gene complete sequence and internal transcribed spacer 2 partial sequence	KU244108.1 Aquilaria crassna voucher FBL01012 internal transcribed spacer 2 partial sequence	0	0
KU244111.1 Aquilaria crassna voucher FBL01017 internal transcribed spacer 2 partial sequence	KU244108.1 Aquilaria crassna voucher FBL01012 internal transcribed spacer 2 partial sequence	0	0
KU244110.1 Aquilaria crassna voucher FBL01014 internal transcribed spacer 2 partial sequence	KU244108.1 Aquilaria crassna voucher FBL01012 internal transcribed spacer 2 partial sequence	0	0
KU244109.1 Aquilaria crassna voucher FBL01013 internal transcribed spacer 2 partial sequence	KU244108.1 Aquilaria crassna voucher FBL01012 internal transcribed spacer 2 partial sequence	0	0
MH134137.1 Aquilaria agallochum internal transcribed spacer 1 partial sequence 5.8S ribosomal RNA gene complete sequence and internal transcribed spacer 2 partial sequence_{aga}	KU238037.1 Aquilaria crassna voucher FBL G10 WC2 internal transcribed spacer 2 partial sequence	0.0137217	0.00541312
KU879012.1 Aquilaria agallochum 18S ribosomal RNA gene partial sequence internal transcribed spacer 1 5.8S ribosomal RNA gene and internal transcribed spacer 2 complete sequence and 28S ribosomal RNA gene partial sequence_{aga}	KU238037.1 Aquilaria crassna voucher FBL G10 WC2 internal transcribed spacer 2 partial sequence	0.0193084	0.00667717
MH134138.1 Aquilaria beccariana internal transcribed spacer 1 partial sequence 5.8S ribosomal RNA gene complete sequence and internal transcribed spacer 2 partial sequence_{aga}	KU238037.1 Aquilaria crassna voucher FBL G10 WC2 internal transcribed spacer 2 partial sequence	0.0192697	0.00684829
KT779116.1 Aquilaria beccariana voucher FBL04001 internal transcribed spacer 1 partial sequence 5.8S ribosomal RNA gene complete sequence and internal transcribed spacer 2 partial sequence_{aga}	KU238037.1 Aquilaria crassna voucher FBL G10 WC2 internal transcribed spacer 2 partial sequence	0.0392154	0.00971233
KT364477.1 Aquilaria beccariana voucher SFN29381 internal transcribed spacer 1 partial sequence 5.8S ribosomal RNA gene complete sequence and internal transcribed spacer 2 partial sequence_{aga}	KU238037.1 Aquilaria crassna voucher FBL G10 WC2 internal transcribed spacer 2 partial sequence	0.0193365	0.00673821
KX351419.1 Aquilaria beccariana voucher S1 5.8S ribosomal RNA gene partial sequence internal transcribed spacer 2 complete sequence and large subunit ribosomal RNA gene partial sequence_{aga}	KU238037.1 Aquilaria crassna voucher FBL G10 WC2 internal transcribed spacer 2 partial sequence	0.00323626	0.00324725
KX424704.1 Aquilaria beccariana 5.8S ribosomal RNA gene partial sequence internal transcribed spacer 2 complete sequence and 28S ribosomal RNA gene partial sequence_{aga}	KU238037.1 Aquilaria crassna voucher FBL G10 WC2 internal transcribed spacer 2 partial sequence	0.0403623	0.0104697
KU238038.1 Aquilaria crassna voucher FBL G11 WC3 internal transcribed spacer 2 partial sequence	KU238037.1 Aquilaria crassna voucher FBL G10 WC2 internal transcribed spacer 2 partial sequence	0.0027248	0.00273681
MH134139.1 Aquilaria crassna internal transcribed spacer 1 partial sequence 5.8S ribosomal RNA gene complete sequence and internal transcribed spacer 2 partial sequence	KU238037.1 Aquilaria crassna voucher FBL G10 WC2 internal transcribed spacer 2 partial sequence	0.0027248	0.00273681
KU244111.1 Aquilaria crassna voucher FBL01017 internal transcribed spacer 2 partial sequence	KU238037.1 Aquilaria crassna voucher FBL G10 WC2 internal transcribed spacer 2 partial sequence	0.0027248	0.00273681
KU244110.1 Aquilaria crassna voucher FBL01014 internal transcribed spacer 2 partial sequence	KU238037.1 Aquilaria crassna voucher FBL G10 WC2 internal transcribed spacer 2 partial sequence	0.0027248	0.00273681
KU244109.1 Aquilaria crassna voucher FBL01013 internal transcribed spacer 2 partial sequence	KU238037.1 Aquilaria crassna voucher FBL G10 WC2 internal transcribed spacer 2 partial sequence	0.0027248	0.00273681
KU244108.1 Aquilaria crassna voucher FBL01012 internal transcribed spacer 2 partial sequence	KU238037.1 Aquilaria crassna voucher FBL G10 WC2 internal transcribed spacer 2 partial sequence	0.0027248	0.00273681
MH134137.1 Aquilaria agallochum internal transcribed spacer 1 partial sequence 5.8S ribosomal RNA gene complete sequence and internal transcribed spacer 2 partial sequence_{aga}	KU238035.1 Aquilaria crassna voucher FBL G04 WC1 internal transcribed spacer 2 partial sequence	0.0137217	0.00541312
KU879012.1 Aquilaria agallochum 18S ribosomal RNA gene partial sequence internal transcribed spacer 1 5.8S ribosomal RNA gene and internal transcribed spacer 2 complete sequence and 28S ribosomal RNA gene partial sequence_{aga}	KU238035.1 Aquilaria crassna voucher FBL G04 WC1 internal transcribed spacer 2 partial sequence	0.0193084	0.00667717
MH134138.1 Aquilaria beccariana internal transcribed spacer 1 partial sequence 5.8S ribosomal RNA gene complete sequence and internal transcribed spacer 2 partial sequence_{aga}	KU238035.1 Aquilaria crassna voucher FBL G04 WC1 internal transcribed spacer 2 partial sequence	0.0192697	0.00684829
KT779116.1 Aquilaria beccariana voucher FBL04001 internal transcribed spacer 1 partial sequence 5.8S ribosomal RNA gene complete sequence and internal transcribed spacer 2 partial sequence_{aga}	KU238035.1 Aquilaria crassna voucher FBL G04 WC1 internal transcribed spacer 2 partial sequence	0.0392154	0.00971233
KT364477.1 Aquilaria beccariana voucher SFN29381 internal transcribed spacer 1 partial sequence 5.8S ribosomal RNA gene complete sequence and internal transcribed spacer 2 partial sequence_{aga}	KU238035.1 Aquilaria crassna voucher FBL G04 WC1 internal transcribed spacer 2 partial sequence	0.0193365	0.00673821
KX351419.1 Aquilaria beccariana voucher S1 5.8S ribosomal RNA gene partial sequence internal transcribed spacer 2 complete sequence and large subunit ribosomal RNA gene partial sequence_{aga}	KU238035.1 Aquilaria crassna voucher FBL G04 WC1 internal transcribed spacer 2 partial sequence	0.00323626	0.00324725
KX424704.1 Aquilaria beccariana 5.8S ribosomal RNA gene partial sequence internal transcribed spacer 2 complete sequence and 28S ribosomal RNA gene partial sequence_{aga}	KU238035.1 Aquilaria crassna voucher FBL G04 WC1 internal transcribed spacer 2 partial sequence	0.0403623	0.0104697
KU238038.1 Aquilaria crassna voucher FBL G11 WC3 internal transcribed spacer 2 partial sequence	KU238035.1 Aquilaria crassna voucher FBL G04 WC1 internal transcribed spacer 2 partial sequence	0.0027248	0.00273681
MH134139.1 Aquilaria crassna internal transcribed spacer 1 partial sequence 5.8S ribosomal RNA gene complete sequence and internal transcribed spacer 2 partial sequence	KU238035.1 Aquilaria crassna voucher FBL G04 WC1 internal transcribed spacer 2 partial sequence	0.0027248	0.00273681
KU244111.1 Aquilaria crassna voucher FBL01017 internal transcribed spacer 2 partial sequence	KU238035.1 Aquilaria crassna voucher FBL G04 WC1 internal transcribed spacer 2 partial sequence	0.0027248	0.00273681
KU244110.1 Aquilaria crassna voucher FBL01014 internal transcribed spacer 2 partial sequence	KU238035.1 Aquilaria crassna voucher FBL G04 WC1 internal transcribed spacer 2 partial sequence	0.0027248	0.00273681
KU244109.1 Aquilaria crassna voucher FBL01013 internal transcribed spacer 2 partial sequence	KU238035.1 Aquilaria crassna voucher FBL G04 WC1 internal transcribed spacer 2 partial sequence	0.0027248	0.00273681
KU244108.1 Aquilaria crassna voucher FBL01012 internal transcribed spacer 2 partial sequence	KU238035.1 Aquilaria crassna voucher FBL G04 WC1 internal transcribed spacer 2 partial sequence	0.0027248	0.00273681
KU238037.1 Aquilaria crassna voucher FBL G10 WC2 internal transcribed spacer 2 partial sequence	KU238035.1 Aquilaria crassna voucher FBL G04 WC1 internal transcribed spacer 2 partial sequence	0	0
MH134137.1 Aquilaria agallochum internal transcribed spacer 1 partial sequence 5.8S ribosomal RNA gene complete sequence and internal transcribed spacer 2 partial sequence_{aga}	KU244085.1 Aquilaria crassna voucher FBL01017 internal transcribed spacer 1 partial sequence 5.8S ribosomal RNA gene complete sequence and internal transcribed spacer 2 partial sequence	0.0165072	0.0059524
KU879012.1 Aquilaria agallochum 18S ribosomal RNA gene partial sequence internal transcribed spacer 1 5.8S ribosomal RNA gene and internal transcribed spacer 2 complete sequence and 28S ribosomal RNA gene partial sequence_{aga}	KU244085.1 Aquilaria crassna voucher FBL01017 internal transcribed spacer 1 partial sequence 5.8S ribosomal RNA gene complete sequence and internal transcribed spacer 2 partial sequence	0.0221253	0.00719082
MH134138.1 Aquilaria beccariana internal transcribed spacer 1 partial sequence 5.8S ribosomal RNA gene complete sequence and internal transcribed spacer 2 partial sequence_{aga}	KU244085.1 Aquilaria crassna voucher FBL01017 internal transcribed spacer 1 partial sequence 5.8S ribosomal RNA gene complete sequence and internal transcribed spacer 2 partial sequence	0.0220708	0.00727399
KT779116.1 Aquilaria beccariana voucher FBL04001 internal transcribed spacer 1 partial sequence 5.8S ribosomal RNA gene complete sequence and internal transcribed spacer 2 partial sequence_{aga}	KU244085.1 Aquilaria crassna voucher FBL01017 internal transcribed spacer 1 partial sequence 5.8S ribosomal RNA gene complete sequence and internal transcribed spacer 2 partial sequence	0.0421308	0.0101917
KT364477.1 Aquilaria beccariana voucher SFN29381 internal transcribed spacer 1 partial sequence 5.8S ribosomal RNA gene complete sequence and internal transcribed spacer 2 partial sequence_{aga}	KU244085.1 Aquilaria crassna voucher FBL01017 internal transcribed spacer 1 partial sequence 5.8S ribosomal RNA gene complete sequence and internal transcribed spacer 2 partial sequence	0.0221534	0.00722737
KX351419.1 Aquilaria beccariana voucher S1 5.8S ribosomal RNA gene partial sequence internal transcribed spacer 2 complete sequence and large subunit ribosomal RNA gene partial sequence_{aga}	KU244085.1 Aquilaria crassna voucher FBL01017 internal transcribed spacer 1 partial sequence 5.8S ribosomal RNA gene complete sequence and internal transcribed spacer 2 partial sequence	0	0
KX424704.1 Aquilaria beccariana 5.8S ribosomal RNA gene partial sequence internal transcribed spacer 2 complete sequence and 28S ribosomal RNA gene partial sequence_{aga}	KU244085.1 Aquilaria crassna voucher FBL01017 internal transcribed spacer 1 partial sequence 5.8S ribosomal RNA gene complete sequence and internal transcribed spacer 2 partial sequence	0.0438711	0.011062
KU238038.1 Aquilaria crassna voucher FBL G11 WC3 internal transcribed spacer 2 partial sequence	KU244085.1 Aquilaria crassna voucher FBL01017 internal transcribed spacer 1 partial sequence 5.8S ribosomal RNA gene complete sequence and internal transcribed spacer 2 partial sequence	0	0
MH134139.1 Aquilaria crassna internal transcribed spacer 1 partial sequence 5.8S ribosomal RNA gene complete sequence and internal transcribed spacer 2 partial sequence	KU244085.1 Aquilaria crassna voucher FBL01017 internal transcribed spacer 1 partial sequence 5.8S ribosomal RNA gene complete sequence and internal transcribed spacer 2 partial sequence	0	0
KU244111.1 Aquilaria crassna voucher FBL01017 internal transcribed spacer 2 partial sequence	KU244085.1 Aquilaria crassna voucher FBL01017 internal transcribed spacer 1 partial sequence 5.8S ribosomal RNA gene complete sequence and internal transcribed spacer 2 partial sequence	0	0
KU244110.1 Aquilaria crassna voucher FBL01014 internal transcribed spacer 2 partial sequence	KU244085.1 Aquilaria crassna voucher FBL01017 internal transcribed spacer 1 partial sequence 5.8S ribosomal RNA gene complete sequence and internal transcribed spacer 2 partial sequence	0	0
KU244109.1 Aquilaria crassna voucher FBL01013 internal transcribed spacer 2 partial sequence	KU244085.1 Aquilaria crassna voucher FBL01017 internal transcribed spacer 1 partial sequence 5.8S ribosomal RNA gene complete sequence and internal transcribed spacer 2 partial sequence	0	0
KU244108.1 Aquilaria crassna voucher FBL01012 internal transcribed spacer 2 partial sequence	KU244085.1 Aquilaria crassna voucher FBL01017 internal transcribed spacer 1 partial sequence 5.8S ribosomal RNA gene complete sequence and internal transcribed spacer 2 partial sequence	0	0
KU238037.1 Aquilaria crassna voucher FBL G10 WC2 internal transcribed spacer 2 partial sequence	KU244085.1 Aquilaria crassna voucher FBL01017 internal transcribed spacer 1 partial sequence 5.8S ribosomal RNA gene complete sequence and internal transcribed spacer 2 partial sequence	0.0027248	0.00273681
KU238035.1 Aquilaria crassna voucher FBL G04 WC1 internal transcribed spacer 2 partial sequence	KU244085.1 Aquilaria crassna voucher FBL01017 internal transcribed spacer 1 partial sequence 5.8S ribosomal RNA gene complete sequence and internal transcribed spacer 2 partial sequence	0.0027248	0.00273681
MH134137.1 Aquilaria agallochum internal transcribed spacer 1 partial sequence 5.8S ribosomal RNA gene complete sequence and internal transcribed spacer 2 partial sequence_{aga}	KU244084.1 Aquilaria crassna voucher FBL01014 internal transcribed spacer 1 partial sequence 5.8S ribosomal RNA gene complete sequence and internal transcribed spacer 2 partial sequence	0.0165072	0.0059524
KU879012.1 Aquilaria agallochum 18S ribosomal RNA gene partial sequence internal transcribed spacer 1 5.8S ribosomal RNA gene and internal transcribed spacer 2 complete sequence and 28S ribosomal RNA gene partial sequence_{aga}	KU244084.1 Aquilaria crassna voucher FBL01014 internal transcribed spacer 1 partial sequence 5.8S ribosomal RNA gene complete sequence and internal transcribed spacer 2 partial sequence	0.0221253	0.00719082
MH134138.1 Aquilaria beccariana internal transcribed spacer 1 partial sequence 5.8S ribosomal RNA gene complete sequence and internal transcribed spacer 2 partial sequence_{aga}	KU244084.1 Aquilaria crassna voucher FBL01014 internal transcribed spacer 1 partial sequence 5.8S ribosomal RNA gene complete sequence and internal transcribed spacer 2 partial sequence	0.0220708	0.00727399
KT779116.1 Aquilaria beccariana voucher FBL04001 internal transcribed spacer 1 partial sequence 5.8S ribosomal RNA gene complete sequence and internal transcribed spacer 2 partial sequence_{aga}	KU244084.1 Aquilaria crassna voucher FBL01014 internal transcribed spacer 1 partial sequence 5.8S ribosomal RNA gene complete sequence and internal transcribed spacer 2 partial sequence	0.0421308	0.0101917
KT364477.1 Aquilaria beccariana voucher SFN29381 internal transcribed spacer 1 partial sequence 5.8S ribosomal RNA gene complete sequence and internal transcribed spacer 2 partial sequence_{aga}	KU244084.1 Aquilaria crassna voucher FBL01014 internal transcribed spacer 1 partial sequence 5.8S ribosomal RNA gene complete sequence and internal transcribed spacer 2 partial sequence	0.0221534	0.00722737
KX351419.1 Aquilaria beccariana voucher S1 5.8S ribosomal RNA gene partial sequence internal transcribed spacer 2 complete sequence and large subunit ribosomal RNA gene partial sequence_{aga}	KU244084.1 Aquilaria crassna voucher FBL01014 internal transcribed spacer 1 partial sequence 5.8S ribosomal RNA gene complete sequence and internal transcribed spacer 2 partial sequence	0	0
KX424704.1 Aquilaria beccariana 5.8S ribosomal RNA gene partial sequence internal transcribed spacer 2 complete sequence and 28S ribosomal RNA gene partial sequence_{aga}	KU244084.1 Aquilaria crassna voucher FBL01014 internal transcribed spacer 1 partial sequence 5.8S ribosomal RNA gene complete sequence and internal transcribed spacer 2 partial sequence	0.0438711	0.011062
KU238038.1 Aquilaria crassna voucher FBL G11 WC3 internal transcribed spacer 2 partial sequence	KU244084.1 Aquilaria crassna voucher FBL01014 internal transcribed spacer 1 partial sequence 5.8S ribosomal RNA gene complete sequence and internal transcribed spacer 2 partial sequence	0	0
MH134139.1 Aquilaria crassna internal transcribed spacer 1 partial sequence 5.8S ribosomal RNA gene complete sequence and internal transcribed spacer 2 partial sequence	KU244084.1 Aquilaria crassna voucher FBL01014 internal transcribed spacer 1 partial sequence 5.8S ribosomal RNA gene complete sequence and internal transcribed spacer 2 partial sequence	0	0
KU244111.1 Aquilaria crassna voucher FBL01017 internal transcribed spacer 2 partial sequence	KU244084.1 Aquilaria crassna voucher FBL01014 internal transcribed spacer 1 partial sequence 5.8S ribosomal RNA gene complete sequence and internal transcribed spacer 2 partial sequence	0	0
KU244110.1 Aquilaria crassna voucher FBL01014 internal transcribed spacer 2 partial sequence	KU244084.1 Aquilaria crassna voucher FBL01014 internal transcribed spacer 1 partial sequence 5.8S ribosomal RNA gene complete sequence and internal transcribed spacer 2 partial sequence	0	0
KU244109.1 Aquilaria crassna voucher FBL01013 internal transcribed spacer 2 partial sequence	KU244084.1 Aquilaria crassna voucher FBL01014 internal transcribed spacer 1 partial sequence 5.8S ribosomal RNA gene complete sequence and internal transcribed spacer 2 partial sequence	0	0
KU244108.1 Aquilaria crassna voucher FBL01012 internal transcribed spacer 2 partial sequence	KU244084.1 Aquilaria crassna voucher FBL01014 internal transcribed spacer 1 partial sequence 5.8S ribosomal RNA gene complete sequence and internal transcribed spacer 2 partial sequence	0	0
KU238037.1 Aquilaria crassna voucher FBL G10 WC2 internal transcribed spacer 2 partial sequence	KU244084.1 Aquilaria crassna voucher FBL01014 internal transcribed spacer 1 partial sequence 5.8S ribosomal RNA gene complete sequence and internal transcribed spacer 2 partial sequence	0.0027248	0.00273681
KU238035.1 Aquilaria crassna voucher FBL G04 WC1 internal transcribed spacer 2 partial sequence	KU244084.1 Aquilaria crassna voucher FBL01014 internal transcribed spacer 1 partial sequence 5.8S ribosomal RNA gene complete sequence and internal transcribed spacer 2 partial sequence	0.0027248	0.00273681
KU244085.1 Aquilaria crassna voucher FBL01017 internal transcribed spacer 1 partial sequence 5.8S ribosomal RNA gene complete sequence and internal transcribed spacer 2 partial sequence	KU244084.1 Aquilaria crassna voucher FBL01014 internal transcribed spacer 1 partial sequence 5.8S ribosomal RNA gene complete sequence and internal transcribed spacer 2 partial sequence	0	0
MH134137.1 Aquilaria agallochum internal transcribed spacer 1 partial sequence 5.8S ribosomal RNA gene complete sequence and internal transcribed spacer 2 partial sequence_{aga}	KU244083.1 Aquilaria crassna voucher FBL01013 internal transcribed spacer 1 partial sequence 5.8S ribosomal RNA gene complete sequence and internal transcribed spacer 2 partial sequence_{cra}	0.0165072	0.0059524
KU879012.1 Aquilaria agallochum 18S ribosomal RNA gene partial sequence internal transcribed spacer 1 5.8S ribosomal RNA gene and internal transcribed spacer 2 complete sequence and 28S ribosomal RNA gene partial sequence_{aga}	KU244083.1 Aquilaria crassna voucher FBL01013 internal transcribed spacer 1 partial sequence 5.8S ribosomal RNA gene complete sequence and internal transcribed spacer 2 partial sequence_{cra}	0.0221253	0.00719082
MH134138.1 Aquilaria beccariana internal transcribed spacer 1 partial sequence 5.8S ribosomal RNA gene complete sequence and internal transcribed spacer 2 partial sequence_{aga}	KU244083.1 Aquilaria crassna voucher FBL01013 internal transcribed spacer 1 partial sequence 5.8S ribosomal RNA gene complete sequence and internal transcribed spacer 2 partial sequence_{cra}	0.0220708	0.00727399
KT779116.1 Aquilaria beccariana voucher FBL04001 internal transcribed spacer 1 partial sequence 5.8S ribosomal RNA gene complete sequence and internal transcribed spacer 2 partial sequence_{aga}	KU244083.1 Aquilaria crassna voucher FBL01013 internal transcribed spacer 1 partial sequence 5.8S ribosomal RNA gene complete sequence and internal transcribed spacer 2 partial sequence_{cra}	0.0421308	0.0101917
KT364477.1 Aquilaria beccariana voucher SFN29381 internal transcribed spacer 1 partial sequence 5.8S ribosomal RNA gene complete sequence and internal transcribed spacer 2 partial sequence_{aga}	KU244083.1 Aquilaria crassna voucher FBL01013 internal transcribed spacer 1 partial sequence 5.8S ribosomal RNA gene complete sequence and internal transcribed spacer 2 partial sequence_{cra}	0.0221534	0.00722737
KX351419.1 Aquilaria beccariana voucher S1 5.8S ribosomal RNA gene partial sequence internal transcribed spacer 2 complete sequence and large subunit ribosomal RNA gene partial sequence_{aga}	KU244083.1 Aquilaria crassna voucher FBL01013 internal transcribed spacer 1 partial sequence 5.8S ribosomal RNA gene complete sequence and internal transcribed spacer 2 partial sequence_{cra}	0	0
KX424704.1 Aquilaria beccariana 5.8S ribosomal RNA gene partial sequence internal transcribed spacer 2 complete sequence and 28S ribosomal RNA gene partial sequence_{aga}	KU244083.1 Aquilaria crassna voucher FBL01013 internal transcribed spacer 1 partial sequence 5.8S ribosomal RNA gene complete sequence and internal transcribed spacer 2 partial sequence_{cra}	0.0438711	0.011062
KU238038.1 Aquilaria crassna voucher FBL G11 WC3 internal transcribed spacer 2 partial sequence	KU244083.1 Aquilaria crassna voucher FBL01013 internal transcribed spacer 1 partial sequence 5.8S ribosomal RNA gene complete sequence and internal transcribed spacer 2 partial sequence_{cra}	0	0
MH134139.1 Aquilaria crassna internal transcribed spacer 1 partial sequence 5.8S ribosomal RNA gene complete sequence and internal transcribed spacer 2 partial sequence	KU244083.1 Aquilaria crassna voucher FBL01013 internal transcribed spacer 1 partial sequence 5.8S ribosomal RNA gene complete sequence and internal transcribed spacer 2 partial sequence_{cra}	0	0
KU244111.1 Aquilaria crassna voucher FBL01017 internal transcribed spacer 2 partial sequence	KU244083.1 Aquilaria crassna voucher FBL01013 internal transcribed spacer 1 partial sequence 5.8S ribosomal RNA gene complete sequence and internal transcribed spacer 2 partial sequence_{cra}	0	0
KU244110.1 Aquilaria crassna voucher FBL01014 internal transcribed spacer 2 partial sequence	KU244083.1 Aquilaria crassna voucher FBL01013 internal transcribed spacer 1 partial sequence 5.8S ribosomal RNA gene complete sequence and internal transcribed spacer 2 partial sequence_{cra}	0	0
KU244109.1 Aquilaria crassna voucher FBL01013 internal transcribed spacer 2 partial sequence	KU244083.1 Aquilaria crassna voucher FBL01013 internal transcribed spacer 1 partial sequence 5.8S ribosomal RNA gene complete sequence and internal transcribed spacer 2 partial sequence_{cra}	0	0
KU244108.1 Aquilaria crassna voucher FBL01012 internal transcribed spacer 2 partial sequence	KU244083.1 Aquilaria crassna voucher FBL01013 internal transcribed spacer 1 partial sequence 5.8S ribosomal RNA gene complete sequence and internal transcribed spacer 2 partial sequence_{cra}	0	0
KU238037.1 Aquilaria crassna voucher FBL G10 WC2 internal transcribed spacer 2 partial sequence	KU244083.1 Aquilaria crassna voucher FBL01013 internal transcribed spacer 1 partial sequence 5.8S ribosomal RNA gene complete sequence and internal transcribed spacer 2 partial sequence_{cra}	0.0027248	0.00273681
KU238035.1 Aquilaria crassna voucher FBL G04 WC1 internal transcribed spacer 2 partial sequence	KU244083.1 Aquilaria crassna voucher FBL01013 internal transcribed spacer 1 partial sequence 5.8S ribosomal RNA gene complete sequence and internal transcribed spacer 2 partial sequence_{cra}	0.0027248	0.00273681
KU244085.1 Aquilaria crassna voucher FBL01017 internal transcribed spacer 1 partial sequence 5.8S ribosomal RNA gene complete sequence and internal transcribed spacer 2 partial sequence	KU244083.1 Aquilaria crassna voucher FBL01013 internal transcribed spacer 1 partial sequence 5.8S ribosomal RNA gene complete sequence and internal transcribed spacer 2 partial sequence_{cra}	0	0
KU244084.1 Aquilaria crassna voucher FBL01014 internal transcribed spacer 1 partial sequence 5.8S ribosomal RNA gene complete sequence and internal transcribed spacer 2 partial sequence	KU244083.1 Aquilaria crassna voucher FBL01013 internal transcribed spacer 1 partial sequence 5.8S ribosomal RNA gene complete sequence and internal transcribed spacer 2 partial sequence_{cra}	0	0
MH134137.1 Aquilaria agallochum internal transcribed spacer 1 partial sequence 5.8S ribosomal RNA gene complete sequence and internal transcribed spacer 2 partial sequence_{aga}	KU244082.1 Aquilaria crassna voucher FBL01012 internal transcribed spacer 1 partial sequence 5.8S ribosomal RNA gene complete sequence and internal transcribed spacer 2 partial sequence	0.0165072	0.0059524
KU879012.1 Aquilaria agallochum 18S ribosomal RNA gene partial sequence internal transcribed spacer 1 5.8S ribosomal RNA gene and internal transcribed spacer 2 complete sequence and 28S ribosomal RNA gene partial sequence_{aga}	KU244082.1 Aquilaria crassna voucher FBL01012 internal transcribed spacer 1 partial sequence 5.8S ribosomal RNA gene complete sequence and internal transcribed spacer 2 partial sequence	0.0221253	0.00719082
MH134138.1 Aquilaria beccariana internal transcribed spacer 1 partial sequence 5.8S ribosomal RNA gene complete sequence and internal transcribed spacer 2 partial sequence_{aga}	KU244082.1 Aquilaria crassna voucher FBL01012 internal transcribed spacer 1 partial sequence 5.8S ribosomal RNA gene complete sequence and internal transcribed spacer 2 partial sequence	0.0220708	0.00727399
KT779116.1 Aquilaria beccariana voucher FBL04001 internal transcribed spacer 1 partial sequence 5.8S ribosomal RNA gene complete sequence and internal transcribed spacer 2 partial sequence_{aga}	KU244082.1 Aquilaria crassna voucher FBL01012 internal transcribed spacer 1 partial sequence 5.8S ribosomal RNA gene complete sequence and internal transcribed spacer 2 partial sequence	0.0421308	0.0101917
KT364477.1 Aquilaria beccariana voucher SFN29381 internal transcribed spacer 1 partial sequence 5.8S ribosomal RNA gene complete sequence and internal transcribed spacer 2 partial sequence_{aga}	KU244082.1 Aquilaria crassna voucher FBL01012 internal transcribed spacer 1 partial sequence 5.8S ribosomal RNA gene complete sequence and internal transcribed spacer 2 partial sequence	0.0221534	0.00722737
KX351419.1 Aquilaria beccariana voucher S1 5.8S ribosomal RNA gene partial sequence internal transcribed spacer 2 complete sequence and large subunit ribosomal RNA gene partial sequence_{aga}	KU244082.1 Aquilaria crassna voucher FBL01012 internal transcribed spacer 1 partial sequence 5.8S ribosomal RNA gene complete sequence and internal transcribed spacer 2 partial sequence	0	0
KX424704.1 Aquilaria beccariana 5.8S ribosomal RNA gene partial sequence internal transcribed spacer 2 complete sequence and 28S ribosomal RNA gene partial sequence_{aga}	KU244082.1 Aquilaria crassna voucher FBL01012 internal transcribed spacer 1 partial sequence 5.8S ribosomal RNA gene complete sequence and internal transcribed spacer 2 partial sequence	0.0438711	0.011062
KU238038.1 Aquilaria crassna voucher FBL G11 WC3 internal transcribed spacer 2 partial sequence	KU244082.1 Aquilaria crassna voucher FBL01012 internal transcribed spacer 1 partial sequence 5.8S ribosomal RNA gene complete sequence and internal transcribed spacer 2 partial sequence	0	0
MH134139.1 Aquilaria crassna internal transcribed spacer 1 partial sequence 5.8S ribosomal RNA gene complete sequence and internal transcribed spacer 2 partial sequence	KU244082.1 Aquilaria crassna voucher FBL01012 internal transcribed spacer 1 partial sequence 5.8S ribosomal RNA gene complete sequence and internal transcribed spacer 2 partial sequence	0	0
KU244111.1 Aquilaria crassna voucher FBL01017 internal transcribed spacer 2 partial sequence	KU244082.1 Aquilaria crassna voucher FBL01012 internal transcribed spacer 1 partial sequence 5.8S ribosomal RNA gene complete sequence and internal transcribed spacer 2 partial sequence	0	0
KU244110.1 Aquilaria crassna voucher FBL01014 internal transcribed spacer 2 partial sequence	KU244082.1 Aquilaria crassna voucher FBL01012 internal transcribed spacer 1 partial sequence 5.8S ribosomal RNA gene complete sequence and internal transcribed spacer 2 partial sequence	0	0
KU244109.1 Aquilaria crassna voucher FBL01013 internal transcribed spacer 2 partial sequence	KU244082.1 Aquilaria crassna voucher FBL01012 internal transcribed spacer 1 partial sequence 5.8S ribosomal RNA gene complete sequence and internal transcribed spacer 2 partial sequence	0	0
KU244108.1 Aquilaria crassna voucher FBL01012 internal transcribed spacer 2 partial sequence	KU244082.1 Aquilaria crassna voucher FBL01012 internal transcribed spacer 1 partial sequence 5.8S ribosomal RNA gene complete sequence and internal transcribed spacer 2 partial sequence	0	0
KU238037.1 Aquilaria crassna voucher FBL G10 WC2 internal transcribed spacer 2 partial sequence	KU244082.1 Aquilaria crassna voucher FBL01012 internal transcribed spacer 1 partial sequence 5.8S ribosomal RNA gene complete sequence and internal transcribed spacer 2 partial sequence	0.0027248	0.00273681
KU238035.1 Aquilaria crassna voucher FBL G04 WC1 internal transcribed spacer 2 partial sequence	KU244082.1 Aquilaria crassna voucher FBL01012 internal transcribed spacer 1 partial sequence 5.8S ribosomal RNA gene complete sequence and internal transcribed spacer 2 partial sequence	0.0027248	0.00273681
KU244085.1 Aquilaria crassna voucher FBL01017 internal transcribed spacer 1 partial sequence 5.8S ribosomal RNA gene complete sequence and internal transcribed spacer 2 partial sequence	KU244082.1 Aquilaria crassna voucher FBL01012 internal transcribed spacer 1 partial sequence 5.8S ribosomal RNA gene complete sequence and internal transcribed spacer 2 partial sequence	0	0
KU244084.1 Aquilaria crassna voucher FBL01014 internal transcribed spacer 1 partial sequence 5.8S ribosomal RNA gene complete sequence and internal transcribed spacer 2 partial sequence	KU244082.1 Aquilaria crassna voucher FBL01012 internal transcribed spacer 1 partial sequence 5.8S ribosomal RNA gene complete sequence and internal transcribed spacer 2 partial sequence	0	0
KU244083.1 Aquilaria crassna voucher FBL01013 internal transcribed spacer 1 partial sequence 5.8S ribosomal RNA gene complete sequence and internal transcribed spacer 2 partial sequence_{cra}	KU244082.1 Aquilaria crassna voucher FBL01012 internal transcribed spacer 1 partial sequence 5.8S ribosomal RNA gene complete sequence and internal transcribed spacer 2 partial sequence	0	0
MH134137.1 Aquilaria agallochum internal transcribed spacer 1 partial sequence 5.8S ribosomal RNA gene complete sequence and internal transcribed spacer 2 partial sequence_{aga}	KT364478.1 Aquilaria crassna voucher FBL01012 internal transcribed spacer 1 partial sequence 5.8S ribosomal RNA gene complete sequence and internal transcribed spacer 2 partial sequence	0.0165072	0.0059524
KU879012.1 Aquilaria agallochum 18S ribosomal RNA gene partial sequence internal transcribed spacer 1 5.8S ribosomal RNA gene and internal transcribed spacer 2 complete sequence and 28S ribosomal RNA gene partial sequence_{aga}	KT364478.1 Aquilaria crassna voucher FBL01012 internal transcribed spacer 1 partial sequence 5.8S ribosomal RNA gene complete sequence and internal transcribed spacer 2 partial sequence	0.0221253	0.00719082
MH134138.1 Aquilaria beccariana internal transcribed spacer 1 partial sequence 5.8S ribosomal RNA gene complete sequence and internal transcribed spacer 2 partial sequence_{aga}	KT364478.1 Aquilaria crassna voucher FBL01012 internal transcribed spacer 1 partial sequence 5.8S ribosomal RNA gene complete sequence and internal transcribed spacer 2 partial sequence	0.0220708	0.00727399
KT779116.1 Aquilaria beccariana voucher FBL04001 internal transcribed spacer 1 partial sequence 5.8S ribosomal RNA gene complete sequence and internal transcribed spacer 2 partial sequence_{aga}	KT364478.1 Aquilaria crassna voucher FBL01012 internal transcribed spacer 1 partial sequence 5.8S ribosomal RNA gene complete sequence and internal transcribed spacer 2 partial sequence	0.0421308	0.0101917
KT364477.1 Aquilaria beccariana voucher SFN29381 internal transcribed spacer 1 partial sequence 5.8S ribosomal RNA gene complete sequence and internal transcribed spacer 2 partial sequence_{aga}	KT364478.1 Aquilaria crassna voucher FBL01012 internal transcribed spacer 1 partial sequence 5.8S ribosomal RNA gene complete sequence and internal transcribed spacer 2 partial sequence	0.0221534	0.00722737
KX351419.1 Aquilaria beccariana voucher S1 5.8S ribosomal RNA gene partial sequence internal transcribed spacer 2 complete sequence and large subunit ribosomal RNA gene partial sequence_{aga}	KT364478.1 Aquilaria crassna voucher FBL01012 internal transcribed spacer 1 partial sequence 5.8S ribosomal RNA gene complete sequence and internal transcribed spacer 2 partial sequence	0	0
KX424704.1 Aquilaria beccariana 5.8S ribosomal RNA gene partial sequence internal transcribed spacer 2 complete sequence and 28S ribosomal RNA gene partial sequence_{aga}	KT364478.1 Aquilaria crassna voucher FBL01012 internal transcribed spacer 1 partial sequence 5.8S ribosomal RNA gene complete sequence and internal transcribed spacer 2 partial sequence	0.0438711	0.011062
KU238038.1 Aquilaria crassna voucher FBL G11 WC3 internal transcribed spacer 2 partial sequence	KT364478.1 Aquilaria crassna voucher FBL01012 internal transcribed spacer 1 partial sequence 5.8S ribosomal RNA gene complete sequence and internal transcribed spacer 2 partial sequence	0	0
MH134139.1 Aquilaria crassna internal transcribed spacer 1 partial sequence 5.8S ribosomal RNA gene complete sequence and internal transcribed spacer 2 partial sequence	KT364478.1 Aquilaria crassna voucher FBL01012 internal transcribed spacer 1 partial sequence 5.8S ribosomal RNA gene complete sequence and internal transcribed spacer 2 partial sequence	0	0
KU244111.1 Aquilaria crassna voucher FBL01017 internal transcribed spacer 2 partial sequence	KT364478.1 Aquilaria crassna voucher FBL01012 internal transcribed spacer 1 partial sequence 5.8S ribosomal RNA gene complete sequence and internal transcribed spacer 2 partial sequence	0	0
KU244110.1 Aquilaria crassna voucher FBL01014 internal transcribed spacer 2 partial sequence	KT364478.1 Aquilaria crassna voucher FBL01012 internal transcribed spacer 1 partial sequence 5.8S ribosomal RNA gene complete sequence and internal transcribed spacer 2 partial sequence	0	0
KU244109.1 Aquilaria crassna voucher FBL01013 internal transcribed spacer 2 partial sequence	KT364478.1 Aquilaria crassna voucher FBL01012 internal transcribed spacer 1 partial sequence 5.8S ribosomal RNA gene complete sequence and internal transcribed spacer 2 partial sequence	0	0
KU244108.1 Aquilaria crassna voucher FBL01012 internal transcribed spacer 2 partial sequence	KT364478.1 Aquilaria crassna voucher FBL01012 internal transcribed spacer 1 partial sequence 5.8S ribosomal RNA gene complete sequence and internal transcribed spacer 2 partial sequence	0	0
KU238037.1 Aquilaria crassna voucher FBL G10 WC2 internal transcribed spacer 2 partial sequence	KT364478.1 Aquilaria crassna voucher FBL01012 internal transcribed spacer 1 partial sequence 5.8S ribosomal RNA gene complete sequence and internal transcribed spacer 2 partial sequence	0.0027248	0.00273681
KU238035.1 Aquilaria crassna voucher FBL G04 WC1 internal transcribed spacer 2 partial sequence	KT364478.1 Aquilaria crassna voucher FBL01012 internal transcribed spacer 1 partial sequence 5.8S ribosomal RNA gene complete sequence and internal transcribed spacer 2 partial sequence	0.0027248	0.00273681
KU244085.1 Aquilaria crassna voucher FBL01017 internal transcribed spacer 1 partial sequence 5.8S ribosomal RNA gene complete sequence and internal transcribed spacer 2 partial sequence	KT364478.1 Aquilaria crassna voucher FBL01012 internal transcribed spacer 1 partial sequence 5.8S ribosomal RNA gene complete sequence and internal transcribed spacer 2 partial sequence	0	0
KU244084.1 Aquilaria crassna voucher FBL01014 internal transcribed spacer 1 partial sequence 5.8S ribosomal RNA gene complete sequence and internal transcribed spacer 2 partial sequence	KT364478.1 Aquilaria crassna voucher FBL01012 internal transcribed spacer 1 partial sequence 5.8S ribosomal RNA gene complete sequence and internal transcribed spacer 2 partial sequence	0	0
KU244083.1 Aquilaria crassna voucher FBL01013 internal transcribed spacer 1 partial sequence 5.8S ribosomal RNA gene complete sequence and internal transcribed spacer 2 partial sequence_{cra}	KT364478.1 Aquilaria crassna voucher FBL01012 internal transcribed spacer 1 partial sequence 5.8S ribosomal RNA gene complete sequence and internal transcribed spacer 2 partial sequence	0	0
KU244082.1 Aquilaria crassna voucher FBL01012 internal transcribed spacer 1 partial sequence 5.8S ribosomal RNA gene complete sequence and internal transcribed spacer 2 partial sequence	KT364478.1 Aquilaria crassna voucher FBL01012 internal transcribed spacer 1 partial sequence 5.8S ribosomal RNA gene complete sequence and internal transcribed spacer 2 partial sequence	0	0
MH134137.1 Aquilaria agallochum internal transcribed spacer 1 partial sequence 5.8S ribosomal RNA gene complete sequence and internal transcribed spacer 2 partial sequence_{aga}	KY817982.1 Aquilaria crassna voucher S-9 small subunit ribosomal RNA gene partial sequence internal transcribed spacer 1 5.8S ribosomal RNA gene and internal transcribed spacer 2 complete sequence and large subunit ribosomal RNA gene partial sequence	0.0165072	0.0059524
KU879012.1 Aquilaria agallochum 18S ribosomal RNA gene partial sequence internal transcribed spacer 1 5.8S ribosomal RNA gene and internal transcribed spacer 2 complete sequence and 28S ribosomal RNA gene partial sequence_{aga}	KY817982.1 Aquilaria crassna voucher S-9 small subunit ribosomal RNA gene partial sequence internal transcribed spacer 1 5.8S ribosomal RNA gene and internal transcribed spacer 2 complete sequence and large subunit ribosomal RNA gene partial sequence	0.0221253	0.00719082
MH134138.1 Aquilaria beccariana internal transcribed spacer 1 partial sequence 5.8S ribosomal RNA gene complete sequence and internal transcribed spacer 2 partial sequence_{aga}	KY817982.1 Aquilaria crassna voucher S-9 small subunit ribosomal RNA gene partial sequence internal transcribed spacer 1 5.8S ribosomal RNA gene and internal transcribed spacer 2 complete sequence and large subunit ribosomal RNA gene partial sequence	0.0220708	0.00727399
KT779116.1 Aquilaria beccariana voucher FBL04001 internal transcribed spacer 1 partial sequence 5.8S ribosomal RNA gene complete sequence and internal transcribed spacer 2 partial sequence_{aga}	KY817982.1 Aquilaria crassna voucher S-9 small subunit ribosomal RNA gene partial sequence internal transcribed spacer 1 5.8S ribosomal RNA gene and internal transcribed spacer 2 complete sequence and large subunit ribosomal RNA gene partial sequence	0.0421308	0.0101917
KT364477.1 Aquilaria beccariana voucher SFN29381 internal transcribed spacer 1 partial sequence 5.8S ribosomal RNA gene complete sequence and internal transcribed spacer 2 partial sequence_{aga}	KY817982.1 Aquilaria crassna voucher S-9 small subunit ribosomal RNA gene partial sequence internal transcribed spacer 1 5.8S ribosomal RNA gene and internal transcribed spacer 2 complete sequence and large subunit ribosomal RNA gene partial sequence	0.0221534	0.00722737
KX351419.1 Aquilaria beccariana voucher S1 5.8S ribosomal RNA gene partial sequence internal transcribed spacer 2 complete sequence and large subunit ribosomal RNA gene partial sequence_{aga}	KY817982.1 Aquilaria crassna voucher S-9 small subunit ribosomal RNA gene partial sequence internal transcribed spacer 1 5.8S ribosomal RNA gene and internal transcribed spacer 2 complete sequence and large subunit ribosomal RNA gene partial sequence	0	0
KX424704.1 Aquilaria beccariana 5.8S ribosomal RNA gene partial sequence internal transcribed spacer 2 complete sequence and 28S ribosomal RNA gene partial sequence_{aga}	KY817982.1 Aquilaria crassna voucher S-9 small subunit ribosomal RNA gene partial sequence internal transcribed spacer 1 5.8S ribosomal RNA gene and internal transcribed spacer 2 complete sequence and large subunit ribosomal RNA gene partial sequence	0.0438711	0.011062
KU238038.1 Aquilaria crassna voucher FBL G11 WC3 internal transcribed spacer 2 partial sequence	KY817982.1 Aquilaria crassna voucher S-9 small subunit ribosomal RNA gene partial sequence internal transcribed spacer 1 5.8S ribosomal RNA gene and internal transcribed spacer 2 complete sequence and large subunit ribosomal RNA gene partial sequence	0	0
MH134139.1 Aquilaria crassna internal transcribed spacer 1 partial sequence 5.8S ribosomal RNA gene complete sequence and internal transcribed spacer 2 partial sequence	KY817982.1 Aquilaria crassna voucher S-9 small subunit ribosomal RNA gene partial sequence internal transcribed spacer 1 5.8S ribosomal RNA gene and internal transcribed spacer 2 complete sequence and large subunit ribosomal RNA gene partial sequence	0	0
KU244111.1 Aquilaria crassna voucher FBL01017 internal transcribed spacer 2 partial sequence	KY817982.1 Aquilaria crassna voucher S-9 small subunit ribosomal RNA gene partial sequence internal transcribed spacer 1 5.8S ribosomal RNA gene and internal transcribed spacer 2 complete sequence and large subunit ribosomal RNA gene partial sequence	0	0
KU244110.1 Aquilaria crassna voucher FBL01014 internal transcribed spacer 2 partial sequence	KY817982.1 Aquilaria crassna voucher S-9 small subunit ribosomal RNA gene partial sequence internal transcribed spacer 1 5.8S ribosomal RNA gene and internal transcribed spacer 2 complete sequence and large subunit ribosomal RNA gene partial sequence	0	0
KU244109.1 Aquilaria crassna voucher FBL01013 internal transcribed spacer 2 partial sequence	KY817982.1 Aquilaria crassna voucher S-9 small subunit ribosomal RNA gene partial sequence internal transcribed spacer 1 5.8S ribosomal RNA gene and internal transcribed spacer 2 complete sequence and large subunit ribosomal RNA gene partial sequence	0	0
KU244108.1 Aquilaria crassna voucher FBL01012 internal transcribed spacer 2 partial sequence	KY817982.1 Aquilaria crassna voucher S-9 small subunit ribosomal RNA gene partial sequence internal transcribed spacer 1 5.8S ribosomal RNA gene and internal transcribed spacer 2 complete sequence and large subunit ribosomal RNA gene partial sequence	0	0
KU238037.1 Aquilaria crassna voucher FBL G10 WC2 internal transcribed spacer 2 partial sequence	KY817982.1 Aquilaria crassna voucher S-9 small subunit ribosomal RNA gene partial sequence internal transcribed spacer 1 5.8S ribosomal RNA gene and internal transcribed spacer 2 complete sequence and large subunit ribosomal RNA gene partial sequence	0.0027248	0.00273681
KU238035.1 Aquilaria crassna voucher FBL G04 WC1 internal transcribed spacer 2 partial sequence	KY817982.1 Aquilaria crassna voucher S-9 small subunit ribosomal RNA gene partial sequence internal transcribed spacer 1 5.8S ribosomal RNA gene and internal transcribed spacer 2 complete sequence and large subunit ribosomal RNA gene partial sequence	0.0027248	0.00273681
KU244085.1 Aquilaria crassna voucher FBL01017 internal transcribed spacer 1 partial sequence 5.8S ribosomal RNA gene complete sequence and internal transcribed spacer 2 partial sequence	KY817982.1 Aquilaria crassna voucher S-9 small subunit ribosomal RNA gene partial sequence internal transcribed spacer 1 5.8S ribosomal RNA gene and internal transcribed spacer 2 complete sequence and large subunit ribosomal RNA gene partial sequence	0	0
KU244084.1 Aquilaria crassna voucher FBL01014 internal transcribed spacer 1 partial sequence 5.8S ribosomal RNA gene complete sequence and internal transcribed spacer 2 partial sequence	KY817982.1 Aquilaria crassna voucher S-9 small subunit ribosomal RNA gene partial sequence internal transcribed spacer 1 5.8S ribosomal RNA gene and internal transcribed spacer 2 complete sequence and large subunit ribosomal RNA gene partial sequence	0	0
KU244083.1 Aquilaria crassna voucher FBL01013 internal transcribed spacer 1 partial sequence 5.8S ribosomal RNA gene complete sequence and internal transcribed spacer 2 partial sequence_{cra}	KY817982.1 Aquilaria crassna voucher S-9 small subunit ribosomal RNA gene partial sequence internal transcribed spacer 1 5.8S ribosomal RNA gene and internal transcribed spacer 2 complete sequence and large subunit ribosomal RNA gene partial sequence	0	0
KU244082.1 Aquilaria crassna voucher FBL01012 internal transcribed spacer 1 partial sequence 5.8S ribosomal RNA gene complete sequence and internal transcribed spacer 2 partial sequence	KY817982.1 Aquilaria crassna voucher S-9 small subunit ribosomal RNA gene partial sequence internal transcribed spacer 1 5.8S ribosomal RNA gene and internal transcribed spacer 2 complete sequence and large subunit ribosomal RNA gene partial sequence	0	0
KT364478.1 Aquilaria crassna voucher FBL01012 internal transcribed spacer 1 partial sequence 5.8S ribosomal RNA gene complete sequence and internal transcribed spacer 2 partial sequence	KY817982.1 Aquilaria crassna voucher S-9 small subunit ribosomal RNA gene partial sequence internal transcribed spacer 1 5.8S ribosomal RNA gene and internal transcribed spacer 2 complete sequence and large subunit ribosomal RNA gene partial sequence	0	0
MH134137.1 Aquilaria agallochum internal transcribed spacer 1 partial sequence 5.8S ribosomal RNA gene complete sequence and internal transcribed spacer 2 partial sequence_{aga}	KY817979.1 Aquilaria crassna voucher S-1 small subunit ribosomal RNA gene partial sequence internal transcribed spacer 1 5.8S ribosomal RNA gene and internal transcribed spacer 2 complete sequence and large subunit ribosomal RNA gene partial sequence	0.0165072	0.0059524
KU879012.1 Aquilaria agallochum 18S ribosomal RNA gene partial sequence internal transcribed spacer 1 5.8S ribosomal RNA gene and internal transcribed spacer 2 complete sequence and 28S ribosomal RNA gene partial sequence_{aga}	KY817979.1 Aquilaria crassna voucher S-1 small subunit ribosomal RNA gene partial sequence internal transcribed spacer 1 5.8S ribosomal RNA gene and internal transcribed spacer 2 complete sequence and large subunit ribosomal RNA gene partial sequence	0.0221253	0.00719082
MH134138.1 Aquilaria beccariana internal transcribed spacer 1 partial sequence 5.8S ribosomal RNA gene complete sequence and internal transcribed spacer 2 partial sequence_{aga}	KY817979.1 Aquilaria crassna voucher S-1 small subunit ribosomal RNA gene partial sequence internal transcribed spacer 1 5.8S ribosomal RNA gene and internal transcribed spacer 2 complete sequence and large subunit ribosomal RNA gene partial sequence	0.0220708	0.00727399
KT779116.1 Aquilaria beccariana voucher FBL04001 internal transcribed spacer 1 partial sequence 5.8S ribosomal RNA gene complete sequence and internal transcribed spacer 2 partial sequence_{aga}	KY817979.1 Aquilaria crassna voucher S-1 small subunit ribosomal RNA gene partial sequence internal transcribed spacer 1 5.8S ribosomal RNA gene and internal transcribed spacer 2 complete sequence and large subunit ribosomal RNA gene partial sequence	0.0421308	0.0101917
KT364477.1 Aquilaria beccariana voucher SFN29381 internal transcribed spacer 1 partial sequence 5.8S ribosomal RNA gene complete sequence and internal transcribed spacer 2 partial sequence_{aga}	KY817979.1 Aquilaria crassna voucher S-1 small subunit ribosomal RNA gene partial sequence internal transcribed spacer 1 5.8S ribosomal RNA gene and internal transcribed spacer 2 complete sequence and large subunit ribosomal RNA gene partial sequence	0.0221534	0.00722737
KX351419.1 Aquilaria beccariana voucher S1 5.8S ribosomal RNA gene partial sequence internal transcribed spacer 2 complete sequence and large subunit ribosomal RNA gene partial sequence_{aga}	KY817979.1 Aquilaria crassna voucher S-1 small subunit ribosomal RNA gene partial sequence internal transcribed spacer 1 5.8S ribosomal RNA gene and internal transcribed spacer 2 complete sequence and large subunit ribosomal RNA gene partial sequence	0	0
KX424704.1 Aquilaria beccariana 5.8S ribosomal RNA gene partial sequence internal transcribed spacer 2 complete sequence and 28S ribosomal RNA gene partial sequence_{aga}	KY817979.1 Aquilaria crassna voucher S-1 small subunit ribosomal RNA gene partial sequence internal transcribed spacer 1 5.8S ribosomal RNA gene and internal transcribed spacer 2 complete sequence and large subunit ribosomal RNA gene partial sequence	0.0438711	0.011062
KU238038.1 Aquilaria crassna voucher FBL G11 WC3 internal transcribed spacer 2 partial sequence	KY817979.1 Aquilaria crassna voucher S-1 small subunit ribosomal RNA gene partial sequence internal transcribed spacer 1 5.8S ribosomal RNA gene and internal transcribed spacer 2 complete sequence and large subunit ribosomal RNA gene partial sequence	0	0
MH134139.1 Aquilaria crassna internal transcribed spacer 1 partial sequence 5.8S ribosomal RNA gene complete sequence and internal transcribed spacer 2 partial sequence	KY817979.1 Aquilaria crassna voucher S-1 small subunit ribosomal RNA gene partial sequence internal transcribed spacer 1 5.8S ribosomal RNA gene and internal transcribed spacer 2 complete sequence and large subunit ribosomal RNA gene partial sequence	0	0
KU244111.1 Aquilaria crassna voucher FBL01017 internal transcribed spacer 2 partial sequence	KY817979.1 Aquilaria crassna voucher S-1 small subunit ribosomal RNA gene partial sequence internal transcribed spacer 1 5.8S ribosomal RNA gene and internal transcribed spacer 2 complete sequence and large subunit ribosomal RNA gene partial sequence	0	0
KU244110.1 Aquilaria crassna voucher FBL01014 internal transcribed spacer 2 partial sequence	KY817979.1 Aquilaria crassna voucher S-1 small subunit ribosomal RNA gene partial sequence internal transcribed spacer 1 5.8S ribosomal RNA gene and internal transcribed spacer 2 complete sequence and large subunit ribosomal RNA gene partial sequence	0	0
KU244109.1 Aquilaria crassna voucher FBL01013 internal transcribed spacer 2 partial sequence	KY817979.1 Aquilaria crassna voucher S-1 small subunit ribosomal RNA gene partial sequence internal transcribed spacer 1 5.8S ribosomal RNA gene and internal transcribed spacer 2 complete sequence and large subunit ribosomal RNA gene partial sequence	0	0
KU244108.1 Aquilaria crassna voucher FBL01012 internal transcribed spacer 2 partial sequence	KY817979.1 Aquilaria crassna voucher S-1 small subunit ribosomal RNA gene partial sequence internal transcribed spacer 1 5.8S ribosomal RNA gene and internal transcribed spacer 2 complete sequence and large subunit ribosomal RNA gene partial sequence	0	0
KU238037.1 Aquilaria crassna voucher FBL G10 WC2 internal transcribed spacer 2 partial sequence	KY817979.1 Aquilaria crassna voucher S-1 small subunit ribosomal RNA gene partial sequence internal transcribed spacer 1 5.8S ribosomal RNA gene and internal transcribed spacer 2 complete sequence and large subunit ribosomal RNA gene partial sequence	0.0027248	0.00273681
KU238035.1 Aquilaria crassna voucher FBL G04 WC1 internal transcribed spacer 2 partial sequence	KY817979.1 Aquilaria crassna voucher S-1 small subunit ribosomal RNA gene partial sequence internal transcribed spacer 1 5.8S ribosomal RNA gene and internal transcribed spacer 2 complete sequence and large subunit ribosomal RNA gene partial sequence	0.0027248	0.00273681
KU244085.1 Aquilaria crassna voucher FBL01017 internal transcribed spacer 1 partial sequence 5.8S ribosomal RNA gene complete sequence and internal transcribed spacer 2 partial sequence	KY817979.1 Aquilaria crassna voucher S-1 small subunit ribosomal RNA gene partial sequence internal transcribed spacer 1 5.8S ribosomal RNA gene and internal transcribed spacer 2 complete sequence and large subunit ribosomal RNA gene partial sequence	0	0
KU244084.1 Aquilaria crassna voucher FBL01014 internal transcribed spacer 1 partial sequence 5.8S ribosomal RNA gene complete sequence and internal transcribed spacer 2 partial sequence	KY817979.1 Aquilaria crassna voucher S-1 small subunit ribosomal RNA gene partial sequence internal transcribed spacer 1 5.8S ribosomal RNA gene and internal transcribed spacer 2 complete sequence and large subunit ribosomal RNA gene partial sequence	0	0
KU244083.1 Aquilaria crassna voucher FBL01013 internal transcribed spacer 1 partial sequence 5.8S ribosomal RNA gene complete sequence and internal transcribed spacer 2 partial sequence_{cra}	KY817979.1 Aquilaria crassna voucher S-1 small subunit ribosomal RNA gene partial sequence internal transcribed spacer 1 5.8S ribosomal RNA gene and internal transcribed spacer 2 complete sequence and large subunit ribosomal RNA gene partial sequence	0	0
KU244082.1 Aquilaria crassna voucher FBL01012 internal transcribed spacer 1 partial sequence 5.8S ribosomal RNA gene complete sequence and internal transcribed spacer 2 partial sequence	KY817979.1 Aquilaria crassna voucher S-1 small subunit ribosomal RNA gene partial sequence internal transcribed spacer 1 5.8S ribosomal RNA gene and internal transcribed spacer 2 complete sequence and large subunit ribosomal RNA gene partial sequence	0	0
KT364478.1 Aquilaria crassna voucher FBL01012 internal transcribed spacer 1 partial sequence 5.8S ribosomal RNA gene complete sequence and internal transcribed spacer 2 partial sequence	KY817979.1 Aquilaria crassna voucher S-1 small subunit ribosomal RNA gene partial sequence internal transcribed spacer 1 5.8S ribosomal RNA gene and internal transcribed spacer 2 complete sequence and large subunit ribosomal RNA gene partial sequence	0	0
KY817982.1 Aquilaria crassna voucher S-9 small subunit ribosomal RNA gene partial sequence internal transcribed spacer 1 5.8S ribosomal RNA gene and internal transcribed spacer 2 complete sequence and large subunit ribosomal RNA gene partial sequence	KY817979.1 Aquilaria crassna voucher S-1 small subunit ribosomal RNA gene partial sequence internal transcribed spacer 1 5.8S ribosomal RNA gene and internal transcribed spacer 2 complete sequence and large subunit ribosomal RNA gene partial sequence	0	0
MH134137.1 Aquilaria agallochum internal transcribed spacer 1 partial sequence 5.8S ribosomal RNA gene complete sequence and internal transcribed spacer 2 partial sequence_{aga}	KY817973.1 Aquilaria crassna voucher ML-9 small subunit ribosomal RNA gene partial sequence internal transcribed spacer 1 5.8S ribosomal RNA gene and internal transcribed spacer 2 complete sequence and large subunit ribosomal RNA gene partial sequence	0.0165072	0.0059524
KU879012.1 Aquilaria agallochum 18S ribosomal RNA gene partial sequence internal transcribed spacer 1 5.8S ribosomal RNA gene and internal transcribed spacer 2 complete sequence and 28S ribosomal RNA gene partial sequence_{aga}	KY817973.1 Aquilaria crassna voucher ML-9 small subunit ribosomal RNA gene partial sequence internal transcribed spacer 1 5.8S ribosomal RNA gene and internal transcribed spacer 2 complete sequence and large subunit ribosomal RNA gene partial sequence	0.0221253	0.00719082
MH134138.1 Aquilaria beccariana internal transcribed spacer 1 partial sequence 5.8S ribosomal RNA gene complete sequence and internal transcribed spacer 2 partial sequence_{aga}	KY817973.1 Aquilaria crassna voucher ML-9 small subunit ribosomal RNA gene partial sequence internal transcribed spacer 1 5.8S ribosomal RNA gene and internal transcribed spacer 2 complete sequence and large subunit ribosomal RNA gene partial sequence	0.0220708	0.00727399
KT779116.1 Aquilaria beccariana voucher FBL04001 internal transcribed spacer 1 partial sequence 5.8S ribosomal RNA gene complete sequence and internal transcribed spacer 2 partial sequence_{aga}	KY817973.1 Aquilaria crassna voucher ML-9 small subunit ribosomal RNA gene partial sequence internal transcribed spacer 1 5.8S ribosomal RNA gene and internal transcribed spacer 2 complete sequence and large subunit ribosomal RNA gene partial sequence	0.0421308	0.0101917
KT364477.1 Aquilaria beccariana voucher SFN29381 internal transcribed spacer 1 partial sequence 5.8S ribosomal RNA gene complete sequence and internal transcribed spacer 2 partial sequence_{aga}	KY817973.1 Aquilaria crassna voucher ML-9 small subunit ribosomal RNA gene partial sequence internal transcribed spacer 1 5.8S ribosomal RNA gene and internal transcribed spacer 2 complete sequence and large subunit ribosomal RNA gene partial sequence	0.0221534	0.00722737
KX351419.1 Aquilaria beccariana voucher S1 5.8S ribosomal RNA gene partial sequence internal transcribed spacer 2 complete sequence and large subunit ribosomal RNA gene partial sequence_{aga}	KY817973.1 Aquilaria crassna voucher ML-9 small subunit ribosomal RNA gene partial sequence internal transcribed spacer 1 5.8S ribosomal RNA gene and internal transcribed spacer 2 complete sequence and large subunit ribosomal RNA gene partial sequence	0	0
KX424704.1 Aquilaria beccariana 5.8S ribosomal RNA gene partial sequence internal transcribed spacer 2 complete sequence and 28S ribosomal RNA gene partial sequence_{aga}	KY817973.1 Aquilaria crassna voucher ML-9 small subunit ribosomal RNA gene partial sequence internal transcribed spacer 1 5.8S ribosomal RNA gene and internal transcribed spacer 2 complete sequence and large subunit ribosomal RNA gene partial sequence	0.0438711	0.011062
KU238038.1 Aquilaria crassna voucher FBL G11 WC3 internal transcribed spacer 2 partial sequence	KY817973.1 Aquilaria crassna voucher ML-9 small subunit ribosomal RNA gene partial sequence internal transcribed spacer 1 5.8S ribosomal RNA gene and internal transcribed spacer 2 complete sequence and large subunit ribosomal RNA gene partial sequence	0	0
MH134139.1 Aquilaria crassna internal transcribed spacer 1 partial sequence 5.8S ribosomal RNA gene complete sequence and internal transcribed spacer 2 partial sequence	KY817973.1 Aquilaria crassna voucher ML-9 small subunit ribosomal RNA gene partial sequence internal transcribed spacer 1 5.8S ribosomal RNA gene and internal transcribed spacer 2 complete sequence and large subunit ribosomal RNA gene partial sequence	0	0
KU244111.1 Aquilaria crassna voucher FBL01017 internal transcribed spacer 2 partial sequence	KY817973.1 Aquilaria crassna voucher ML-9 small subunit ribosomal RNA gene partial sequence internal transcribed spacer 1 5.8S ribosomal RNA gene and internal transcribed spacer 2 complete sequence and large subunit ribosomal RNA gene partial sequence	0	0
KU244110.1 Aquilaria crassna voucher FBL01014 internal transcribed spacer 2 partial sequence	KY817973.1 Aquilaria crassna voucher ML-9 small subunit ribosomal RNA gene partial sequence internal transcribed spacer 1 5.8S ribosomal RNA gene and internal transcribed spacer 2 complete sequence and large subunit ribosomal RNA gene partial sequence	0	0
KU244109.1 Aquilaria crassna voucher FBL01013 internal transcribed spacer 2 partial sequence	KY817973.1 Aquilaria crassna voucher ML-9 small subunit ribosomal RNA gene partial sequence internal transcribed spacer 1 5.8S ribosomal RNA gene and internal transcribed spacer 2 complete sequence and large subunit ribosomal RNA gene partial sequence	0	0
KU244108.1 Aquilaria crassna voucher FBL01012 internal transcribed spacer 2 partial sequence	KY817973.1 Aquilaria crassna voucher ML-9 small subunit ribosomal RNA gene partial sequence internal transcribed spacer 1 5.8S ribosomal RNA gene and internal transcribed spacer 2 complete sequence and large subunit ribosomal RNA gene partial sequence	0	0
KU238037.1 Aquilaria crassna voucher FBL G10 WC2 internal transcribed spacer 2 partial sequence	KY817973.1 Aquilaria crassna voucher ML-9 small subunit ribosomal RNA gene partial sequence internal transcribed spacer 1 5.8S ribosomal RNA gene and internal transcribed spacer 2 complete sequence and large subunit ribosomal RNA gene partial sequence	0.0027248	0.00273681
KU238035.1 Aquilaria crassna voucher FBL G04 WC1 internal transcribed spacer 2 partial sequence	KY817973.1 Aquilaria crassna voucher ML-9 small subunit ribosomal RNA gene partial sequence internal transcribed spacer 1 5.8S ribosomal RNA gene and internal transcribed spacer 2 complete sequence and large subunit ribosomal RNA gene partial sequence	0.0027248	0.00273681
KU244085.1 Aquilaria crassna voucher FBL01017 internal transcribed spacer 1 partial sequence 5.8S ribosomal RNA gene complete sequence and internal transcribed spacer 2 partial sequence	KY817973.1 Aquilaria crassna voucher ML-9 small subunit ribosomal RNA gene partial sequence internal transcribed spacer 1 5.8S ribosomal RNA gene and internal transcribed spacer 2 complete sequence and large subunit ribosomal RNA gene partial sequence	0	0
KU244084.1 Aquilaria crassna voucher FBL01014 internal transcribed spacer 1 partial sequence 5.8S ribosomal RNA gene complete sequence and internal transcribed spacer 2 partial sequence	KY817973.1 Aquilaria crassna voucher ML-9 small subunit ribosomal RNA gene partial sequence internal transcribed spacer 1 5.8S ribosomal RNA gene and internal transcribed spacer 2 complete sequence and large subunit ribosomal RNA gene partial sequence	0	0
KU244083.1 Aquilaria crassna voucher FBL01013 internal transcribed spacer 1 partial sequence 5.8S ribosomal RNA gene complete sequence and internal transcribed spacer 2 partial sequence_{cra}	KY817973.1 Aquilaria crassna voucher ML-9 small subunit ribosomal RNA gene partial sequence internal transcribed spacer 1 5.8S ribosomal RNA gene and internal transcribed spacer 2 complete sequence and large subunit ribosomal RNA gene partial sequence	0	0
KU244082.1 Aquilaria crassna voucher FBL01012 internal transcribed spacer 1 partial sequence 5.8S ribosomal RNA gene complete sequence and internal transcribed spacer 2 partial sequence	KY817973.1 Aquilaria crassna voucher ML-9 small subunit ribosomal RNA gene partial sequence internal transcribed spacer 1 5.8S ribosomal RNA gene and internal transcribed spacer 2 complete sequence and large subunit ribosomal RNA gene partial sequence	0	0
KT364478.1 Aquilaria crassna voucher FBL01012 internal transcribed spacer 1 partial sequence 5.8S ribosomal RNA gene complete sequence and internal transcribed spacer 2 partial sequence	KY817973.1 Aquilaria crassna voucher ML-9 small subunit ribosomal RNA gene partial sequence internal transcribed spacer 1 5.8S ribosomal RNA gene and internal transcribed spacer 2 complete sequence and large subunit ribosomal RNA gene partial sequence	0	0
KY817982.1 Aquilaria crassna voucher S-9 small subunit ribosomal RNA gene partial sequence internal transcribed spacer 1 5.8S ribosomal RNA gene and internal transcribed spacer 2 complete sequence and large subunit ribosomal RNA gene partial sequence	KY817973.1 Aquilaria crassna voucher ML-9 small subunit ribosomal RNA gene partial sequence internal transcribed spacer 1 5.8S ribosomal RNA gene and internal transcribed spacer 2 complete sequence and large subunit ribosomal RNA gene partial sequence	0	0
KY817979.1 Aquilaria crassna voucher S-1 small subunit ribosomal RNA gene partial sequence internal transcribed spacer 1 5.8S ribosomal RNA gene and internal transcribed spacer 2 complete sequence and large subunit ribosomal RNA gene partial sequence	KY817973.1 Aquilaria crassna voucher ML-9 small subunit ribosomal RNA gene partial sequence internal transcribed spacer 1 5.8S ribosomal RNA gene and internal transcribed spacer 2 complete sequence and large subunit ribosomal RNA gene partial sequence	0	0
MH134137.1 Aquilaria agallochum internal transcribed spacer 1 partial sequence 5.8S ribosomal RNA gene complete sequence and internal transcribed spacer 2 partial sequence_{aga}	KY817972.1 Aquilaria crassna voucher ML-8 small subunit ribosomal RNA gene partial sequence internal transcribed spacer 1 5.8S ribosomal RNA gene and internal transcribed spacer 2 complete sequence and large subunit ribosomal RNA gene partial sequence	0.0165072	0.0059524
KU879012.1 Aquilaria agallochum 18S ribosomal RNA gene partial sequence internal transcribed spacer 1 5.8S ribosomal RNA gene and internal transcribed spacer 2 complete sequence and 28S ribosomal RNA gene partial sequence_{aga}	KY817972.1 Aquilaria crassna voucher ML-8 small subunit ribosomal RNA gene partial sequence internal transcribed spacer 1 5.8S ribosomal RNA gene and internal transcribed spacer 2 complete sequence and large subunit ribosomal RNA gene partial sequence	0.0221253	0.00719082
MH134138.1 Aquilaria beccariana internal transcribed spacer 1 partial sequence 5.8S ribosomal RNA gene complete sequence and internal transcribed spacer 2 partial sequence_{aga}	KY817972.1 Aquilaria crassna voucher ML-8 small subunit ribosomal RNA gene partial sequence internal transcribed spacer 1 5.8S ribosomal RNA gene and internal transcribed spacer 2 complete sequence and large subunit ribosomal RNA gene partial sequence	0.0220708	0.00727399
KT779116.1 Aquilaria beccariana voucher FBL04001 internal transcribed spacer 1 partial sequence 5.8S ribosomal RNA gene complete sequence and internal transcribed spacer 2 partial sequence_{aga}	KY817972.1 Aquilaria crassna voucher ML-8 small subunit ribosomal RNA gene partial sequence internal transcribed spacer 1 5.8S ribosomal RNA gene and internal transcribed spacer 2 complete sequence and large subunit ribosomal RNA gene partial sequence	0.0421308	0.0101917
KT364477.1 Aquilaria beccariana voucher SFN29381 internal transcribed spacer 1 partial sequence 5.8S ribosomal RNA gene complete sequence and internal transcribed spacer 2 partial sequence_{aga}	KY817972.1 Aquilaria crassna voucher ML-8 small subunit ribosomal RNA gene partial sequence internal transcribed spacer 1 5.8S ribosomal RNA gene and internal transcribed spacer 2 complete sequence and large subunit ribosomal RNA gene partial sequence	0.0221534	0.00722737
KX351419.1 Aquilaria beccariana voucher S1 5.8S ribosomal RNA gene partial sequence internal transcribed spacer 2 complete sequence and large subunit ribosomal RNA gene partial sequence_{aga}	KY817972.1 Aquilaria crassna voucher ML-8 small subunit ribosomal RNA gene partial sequence internal transcribed spacer 1 5.8S ribosomal RNA gene and internal transcribed spacer 2 complete sequence and large subunit ribosomal RNA gene partial sequence	0	0
KX424704.1 Aquilaria beccariana 5.8S ribosomal RNA gene partial sequence internal transcribed spacer 2 complete sequence and 28S ribosomal RNA gene partial sequence_{aga}	KY817972.1 Aquilaria crassna voucher ML-8 small subunit ribosomal RNA gene partial sequence internal transcribed spacer 1 5.8S ribosomal RNA gene and internal transcribed spacer 2 complete sequence and large subunit ribosomal RNA gene partial sequence	0.0438711	0.011062
KU238038.1 Aquilaria crassna voucher FBL G11 WC3 internal transcribed spacer 2 partial sequence	KY817972.1 Aquilaria crassna voucher ML-8 small subunit ribosomal RNA gene partial sequence internal transcribed spacer 1 5.8S ribosomal RNA gene and internal transcribed spacer 2 complete sequence and large subunit ribosomal RNA gene partial sequence	0	0
MH134139.1 Aquilaria crassna internal transcribed spacer 1 partial sequence 5.8S ribosomal RNA gene complete sequence and internal transcribed spacer 2 partial sequence	KY817972.1 Aquilaria crassna voucher ML-8 small subunit ribosomal RNA gene partial sequence internal transcribed spacer 1 5.8S ribosomal RNA gene and internal transcribed spacer 2 complete sequence and large subunit ribosomal RNA gene partial sequence	0	0
KU244111.1 Aquilaria crassna voucher FBL01017 internal transcribed spacer 2 partial sequence	KY817972.1 Aquilaria crassna voucher ML-8 small subunit ribosomal RNA gene partial sequence internal transcribed spacer 1 5.8S ribosomal RNA gene and internal transcribed spacer 2 complete sequence and large subunit ribosomal RNA gene partial sequence	0	0
KU244110.1 Aquilaria crassna voucher FBL01014 internal transcribed spacer 2 partial sequence	KY817972.1 Aquilaria crassna voucher ML-8 small subunit ribosomal RNA gene partial sequence internal transcribed spacer 1 5.8S ribosomal RNA gene and internal transcribed spacer 2 complete sequence and large subunit ribosomal RNA gene partial sequence	0	0
KU244109.1 Aquilaria crassna voucher FBL01013 internal transcribed spacer 2 partial sequence	KY817972.1 Aquilaria crassna voucher ML-8 small subunit ribosomal RNA gene partial sequence internal transcribed spacer 1 5.8S ribosomal RNA gene and internal transcribed spacer 2 complete sequence and large subunit ribosomal RNA gene partial sequence	0	0
KU244108.1 Aquilaria crassna voucher FBL01012 internal transcribed spacer 2 partial sequence	KY817972.1 Aquilaria crassna voucher ML-8 small subunit ribosomal RNA gene partial sequence internal transcribed spacer 1 5.8S ribosomal RNA gene and internal transcribed spacer 2 complete sequence and large subunit ribosomal RNA gene partial sequence	0	0
KU238037.1 Aquilaria crassna voucher FBL G10 WC2 internal transcribed spacer 2 partial sequence	KY817972.1 Aquilaria crassna voucher ML-8 small subunit ribosomal RNA gene partial sequence internal transcribed spacer 1 5.8S ribosomal RNA gene and internal transcribed spacer 2 complete sequence and large subunit ribosomal RNA gene partial sequence	0.0027248	0.00273681
KU238035.1 Aquilaria crassna voucher FBL G04 WC1 internal transcribed spacer 2 partial sequence	KY817972.1 Aquilaria crassna voucher ML-8 small subunit ribosomal RNA gene partial sequence internal transcribed spacer 1 5.8S ribosomal RNA gene and internal transcribed spacer 2 complete sequence and large subunit ribosomal RNA gene partial sequence	0.0027248	0.00273681
KU244085.1 Aquilaria crassna voucher FBL01017 internal transcribed spacer 1 partial sequence 5.8S ribosomal RNA gene complete sequence and internal transcribed spacer 2 partial sequence	KY817972.1 Aquilaria crassna voucher ML-8 small subunit ribosomal RNA gene partial sequence internal transcribed spacer 1 5.8S ribosomal RNA gene and internal transcribed spacer 2 complete sequence and large subunit ribosomal RNA gene partial sequence	0	0
KU244084.1 Aquilaria crassna voucher FBL01014 internal transcribed spacer 1 partial sequence 5.8S ribosomal RNA gene complete sequence and internal transcribed spacer 2 partial sequence	KY817972.1 Aquilaria crassna voucher ML-8 small subunit ribosomal RNA gene partial sequence internal transcribed spacer 1 5.8S ribosomal RNA gene and internal transcribed spacer 2 complete sequence and large subunit ribosomal RNA gene partial sequence	0	0
KU244083.1 Aquilaria crassna voucher FBL01013 internal transcribed spacer 1 partial sequence 5.8S ribosomal RNA gene complete sequence and internal transcribed spacer 2 partial sequence_{cra}	KY817972.1 Aquilaria crassna voucher ML-8 small subunit ribosomal RNA gene partial sequence internal transcribed spacer 1 5.8S ribosomal RNA gene and internal transcribed spacer 2 complete sequence and large subunit ribosomal RNA gene partial sequence	0	0
KU244082.1 Aquilaria crassna voucher FBL01012 internal transcribed spacer 1 partial sequence 5.8S ribosomal RNA gene complete sequence and internal transcribed spacer 2 partial sequence	KY817972.1 Aquilaria crassna voucher ML-8 small subunit ribosomal RNA gene partial sequence internal transcribed spacer 1 5.8S ribosomal RNA gene and internal transcribed spacer 2 complete sequence and large subunit ribosomal RNA gene partial sequence	0	0
KT364478.1 Aquilaria crassna voucher FBL01012 internal transcribed spacer 1 partial sequence 5.8S ribosomal RNA gene complete sequence and internal transcribed spacer 2 partial sequence	KY817972.1 Aquilaria crassna voucher ML-8 small subunit ribosomal RNA gene partial sequence internal transcribed spacer 1 5.8S ribosomal RNA gene and internal transcribed spacer 2 complete sequence and large subunit ribosomal RNA gene partial sequence	0	0
KY817982.1 Aquilaria crassna voucher S-9 small subunit ribosomal RNA gene partial sequence internal transcribed spacer 1 5.8S ribosomal RNA gene and internal transcribed spacer 2 complete sequence and large subunit ribosomal RNA gene partial sequence	KY817972.1 Aquilaria crassna voucher ML-8 small subunit ribosomal RNA gene partial sequence internal transcribed spacer 1 5.8S ribosomal RNA gene and internal transcribed spacer 2 complete sequence and large subunit ribosomal RNA gene partial sequence	0	0
KY817979.1 Aquilaria crassna voucher S-1 small subunit ribosomal RNA gene partial sequence internal transcribed spacer 1 5.8S ribosomal RNA gene and internal transcribed spacer 2 complete sequence and large subunit ribosomal RNA gene partial sequence	KY817972.1 Aquilaria crassna voucher ML-8 small subunit ribosomal RNA gene partial sequence internal transcribed spacer 1 5.8S ribosomal RNA gene and internal transcribed spacer 2 complete sequence and large subunit ribosomal RNA gene partial sequence	0	0
KY817973.1 Aquilaria crassna voucher ML-9 small subunit ribosomal RNA gene partial sequence internal transcribed spacer 1 5.8S ribosomal RNA gene and internal transcribed spacer 2 complete sequence and large subunit ribosomal RNA gene partial sequence	KY817972.1 Aquilaria crassna voucher ML-8 small subunit ribosomal RNA gene partial sequence internal transcribed spacer 1 5.8S ribosomal RNA gene and internal transcribed spacer 2 complete sequence and large subunit ribosomal RNA gene partial sequence	0	0
MH134137.1 Aquilaria agallochum internal transcribed spacer 1 partial sequence 5.8S ribosomal RNA gene complete sequence and internal transcribed spacer 2 partial sequence_{aga}	KY817971.1 Aquilaria crassna voucher ML-7 small subunit ribosomal RNA gene partial sequence internal transcribed spacer 1 5.8S ribosomal RNA gene and internal transcribed spacer 2 complete sequence and large subunit ribosomal RNA gene partial sequence	0.0165072	0.0059524
KU879012.1 Aquilaria agallochum 18S ribosomal RNA gene partial sequence internal transcribed spacer 1 5.8S ribosomal RNA gene and internal transcribed spacer 2 complete sequence and 28S ribosomal RNA gene partial sequence_{aga}	KY817971.1 Aquilaria crassna voucher ML-7 small subunit ribosomal RNA gene partial sequence internal transcribed spacer 1 5.8S ribosomal RNA gene and internal transcribed spacer 2 complete sequence and large subunit ribosomal RNA gene partial sequence	0.0221253	0.00719082
MH134138.1 Aquilaria beccariana internal transcribed spacer 1 partial sequence 5.8S ribosomal RNA gene complete sequence and internal transcribed spacer 2 partial sequence_{aga}	KY817971.1 Aquilaria crassna voucher ML-7 small subunit ribosomal RNA gene partial sequence internal transcribed spacer 1 5.8S ribosomal RNA gene and internal transcribed spacer 2 complete sequence and large subunit ribosomal RNA gene partial sequence	0.0220708	0.00727399
KT779116.1 Aquilaria beccariana voucher FBL04001 internal transcribed spacer 1 partial sequence 5.8S ribosomal RNA gene complete sequence and internal transcribed spacer 2 partial sequence_{aga}	KY817971.1 Aquilaria crassna voucher ML-7 small subunit ribosomal RNA gene partial sequence internal transcribed spacer 1 5.8S ribosomal RNA gene and internal transcribed spacer 2 complete sequence and large subunit ribosomal RNA gene partial sequence	0.0421308	0.0101917
KT364477.1 Aquilaria beccariana voucher SFN29381 internal transcribed spacer 1 partial sequence 5.8S ribosomal RNA gene complete sequence and internal transcribed spacer 2 partial sequence_{aga}	KY817971.1 Aquilaria crassna voucher ML-7 small subunit ribosomal RNA gene partial sequence internal transcribed spacer 1 5.8S ribosomal RNA gene and internal transcribed spacer 2 complete sequence and large subunit ribosomal RNA gene partial sequence	0.0221534	0.00722737
KX351419.1 Aquilaria beccariana voucher S1 5.8S ribosomal RNA gene partial sequence internal transcribed spacer 2 complete sequence and large subunit ribosomal RNA gene partial sequence_{aga}	KY817971.1 Aquilaria crassna voucher ML-7 small subunit ribosomal RNA gene partial sequence internal transcribed spacer 1 5.8S ribosomal RNA gene and internal transcribed spacer 2 complete sequence and large subunit ribosomal RNA gene partial sequence	0	0
KX424704.1 Aquilaria beccariana 5.8S ribosomal RNA gene partial sequence internal transcribed spacer 2 complete sequence and 28S ribosomal RNA gene partial sequence_{aga}	KY817971.1 Aquilaria crassna voucher ML-7 small subunit ribosomal RNA gene partial sequence internal transcribed spacer 1 5.8S ribosomal RNA gene and internal transcribed spacer 2 complete sequence and large subunit ribosomal RNA gene partial sequence	0.0438711	0.011062
KU238038.1 Aquilaria crassna voucher FBL G11 WC3 internal transcribed spacer 2 partial sequence	KY817971.1 Aquilaria crassna voucher ML-7 small subunit ribosomal RNA gene partial sequence internal transcribed spacer 1 5.8S ribosomal RNA gene and internal transcribed spacer 2 complete sequence and large subunit ribosomal RNA gene partial sequence	0	0
MH134139.1 Aquilaria crassna internal transcribed spacer 1 partial sequence 5.8S ribosomal RNA gene complete sequence and internal transcribed spacer 2 partial sequence	KY817971.1 Aquilaria crassna voucher ML-7 small subunit ribosomal RNA gene partial sequence internal transcribed spacer 1 5.8S ribosomal RNA gene and internal transcribed spacer 2 complete sequence and large subunit ribosomal RNA gene partial sequence	0	0
KU244111.1 Aquilaria crassna voucher FBL01017 internal transcribed spacer 2 partial sequence	KY817971.1 Aquilaria crassna voucher ML-7 small subunit ribosomal RNA gene partial sequence internal transcribed spacer 1 5.8S ribosomal RNA gene and internal transcribed spacer 2 complete sequence and large subunit ribosomal RNA gene partial sequence	0	0
KU244110.1 Aquilaria crassna voucher FBL01014 internal transcribed spacer 2 partial sequence	KY817971.1 Aquilaria crassna voucher ML-7 small subunit ribosomal RNA gene partial sequence internal transcribed spacer 1 5.8S ribosomal RNA gene and internal transcribed spacer 2 complete sequence and large subunit ribosomal RNA gene partial sequence	0	0
KU244109.1 Aquilaria crassna voucher FBL01013 internal transcribed spacer 2 partial sequence	KY817971.1 Aquilaria crassna voucher ML-7 small subunit ribosomal RNA gene partial sequence internal transcribed spacer 1 5.8S ribosomal RNA gene and internal transcribed spacer 2 complete sequence and large subunit ribosomal RNA gene partial sequence	0	0
KU244108.1 Aquilaria crassna voucher FBL01012 internal transcribed spacer 2 partial sequence	KY817971.1 Aquilaria crassna voucher ML-7 small subunit ribosomal RNA gene partial sequence internal transcribed spacer 1 5.8S ribosomal RNA gene and internal transcribed spacer 2 complete sequence and large subunit ribosomal RNA gene partial sequence	0	0
KU238037.1 Aquilaria crassna voucher FBL G10 WC2 internal transcribed spacer 2 partial sequence	KY817971.1 Aquilaria crassna voucher ML-7 small subunit ribosomal RNA gene partial sequence internal transcribed spacer 1 5.8S ribosomal RNA gene and internal transcribed spacer 2 complete sequence and large subunit ribosomal RNA gene partial sequence	0.0027248	0.00273681
KU238035.1 Aquilaria crassna voucher FBL G04 WC1 internal transcribed spacer 2 partial sequence	KY817971.1 Aquilaria crassna voucher ML-7 small subunit ribosomal RNA gene partial sequence internal transcribed spacer 1 5.8S ribosomal RNA gene and internal transcribed spacer 2 complete sequence and large subunit ribosomal RNA gene partial sequence	0.0027248	0.00273681
KU244085.1 Aquilaria crassna voucher FBL01017 internal transcribed spacer 1 partial sequence 5.8S ribosomal RNA gene complete sequence and internal transcribed spacer 2 partial sequence	KY817971.1 Aquilaria crassna voucher ML-7 small subunit ribosomal RNA gene partial sequence internal transcribed spacer 1 5.8S ribosomal RNA gene and internal transcribed spacer 2 complete sequence and large subunit ribosomal RNA gene partial sequence	0	0
KU244084.1 Aquilaria crassna voucher FBL01014 internal transcribed spacer 1 partial sequence 5.8S ribosomal RNA gene complete sequence and internal transcribed spacer 2 partial sequence	KY817971.1 Aquilaria crassna voucher ML-7 small subunit ribosomal RNA gene partial sequence internal transcribed spacer 1 5.8S ribosomal RNA gene and internal transcribed spacer 2 complete sequence and large subunit ribosomal RNA gene partial sequence	0	0
KU244083.1 Aquilaria crassna voucher FBL01013 internal transcribed spacer 1 partial sequence 5.8S ribosomal RNA gene complete sequence and internal transcribed spacer 2 partial sequence_{cra}	KY817971.1 Aquilaria crassna voucher ML-7 small subunit ribosomal RNA gene partial sequence internal transcribed spacer 1 5.8S ribosomal RNA gene and internal transcribed spacer 2 complete sequence and large subunit ribosomal RNA gene partial sequence	0	0
KU244082.1 Aquilaria crassna voucher FBL01012 internal transcribed spacer 1 partial sequence 5.8S ribosomal RNA gene complete sequence and internal transcribed spacer 2 partial sequence	KY817971.1 Aquilaria crassna voucher ML-7 small subunit ribosomal RNA gene partial sequence internal transcribed spacer 1 5.8S ribosomal RNA gene and internal transcribed spacer 2 complete sequence and large subunit ribosomal RNA gene partial sequence	0	0
KT364478.1 Aquilaria crassna voucher FBL01012 internal transcribed spacer 1 partial sequence 5.8S ribosomal RNA gene complete sequence and internal transcribed spacer 2 partial sequence	KY817971.1 Aquilaria crassna voucher ML-7 small subunit ribosomal RNA gene partial sequence internal transcribed spacer 1 5.8S ribosomal RNA gene and internal transcribed spacer 2 complete sequence and large subunit ribosomal RNA gene partial sequence	0	0
KY817982.1 Aquilaria crassna voucher S-9 small subunit ribosomal RNA gene partial sequence internal transcribed spacer 1 5.8S ribosomal RNA gene and internal transcribed spacer 2 complete sequence and large subunit ribosomal RNA gene partial sequence	KY817971.1 Aquilaria crassna voucher ML-7 small subunit ribosomal RNA gene partial sequence internal transcribed spacer 1 5.8S ribosomal RNA gene and internal transcribed spacer 2 complete sequence and large subunit ribosomal RNA gene partial sequence	0	0
KY817979.1 Aquilaria crassna voucher S-1 small subunit ribosomal RNA gene partial sequence internal transcribed spacer 1 5.8S ribosomal RNA gene and internal transcribed spacer 2 complete sequence and large subunit ribosomal RNA gene partial sequence	KY817971.1 Aquilaria crassna voucher ML-7 small subunit ribosomal RNA gene partial sequence internal transcribed spacer 1 5.8S ribosomal RNA gene and internal transcribed spacer 2 complete sequence and large subunit ribosomal RNA gene partial sequence	0	0
KY817973.1 Aquilaria crassna voucher ML-9 small subunit ribosomal RNA gene partial sequence internal transcribed spacer 1 5.8S ribosomal RNA gene and internal transcribed spacer 2 complete sequence and large subunit ribosomal RNA gene partial sequence	KY817971.1 Aquilaria crassna voucher ML-7 small subunit ribosomal RNA gene partial sequence internal transcribed spacer 1 5.8S ribosomal RNA gene and internal transcribed spacer 2 complete sequence and large subunit ribosomal RNA gene partial sequence	0	0
KY817972.1 Aquilaria crassna voucher ML-8 small subunit ribosomal RNA gene partial sequence internal transcribed spacer 1 5.8S ribosomal RNA gene and internal transcribed spacer 2 complete sequence and large subunit ribosomal RNA gene partial sequence	KY817971.1 Aquilaria crassna voucher ML-7 small subunit ribosomal RNA gene partial sequence internal transcribed spacer 1 5.8S ribosomal RNA gene and internal transcribed spacer 2 complete sequence and large subunit ribosomal RNA gene partial sequence	0	0
MH134137.1 Aquilaria agallochum internal transcribed spacer 1 partial sequence 5.8S ribosomal RNA gene complete sequence and internal transcribed spacer 2 partial sequence_{aga}	KY817970.1 Aquilaria crassna voucher ML-6 small subunit ribosomal RNA gene partial sequence internal transcribed spacer 1 5.8S ribosomal RNA gene and internal transcribed spacer 2 complete sequence and large subunit ribosomal RNA gene partial sequence	0.0165072	0.0059524
KU879012.1 Aquilaria agallochum 18S ribosomal RNA gene partial sequence internal transcribed spacer 1 5.8S ribosomal RNA gene and internal transcribed spacer 2 complete sequence and 28S ribosomal RNA gene partial sequence_{aga}	KY817970.1 Aquilaria crassna voucher ML-6 small subunit ribosomal RNA gene partial sequence internal transcribed spacer 1 5.8S ribosomal RNA gene and internal transcribed spacer 2 complete sequence and large subunit ribosomal RNA gene partial sequence	0.0221253	0.00719082
MH134138.1 Aquilaria beccariana internal transcribed spacer 1 partial sequence 5.8S ribosomal RNA gene complete sequence and internal transcribed spacer 2 partial sequence_{aga}	KY817970.1 Aquilaria crassna voucher ML-6 small subunit ribosomal RNA gene partial sequence internal transcribed spacer 1 5.8S ribosomal RNA gene and internal transcribed spacer 2 complete sequence and large subunit ribosomal RNA gene partial sequence	0.0220708	0.00727399
KT779116.1 Aquilaria beccariana voucher FBL04001 internal transcribed spacer 1 partial sequence 5.8S ribosomal RNA gene complete sequence and internal transcribed spacer 2 partial sequence_{aga}	KY817970.1 Aquilaria crassna voucher ML-6 small subunit ribosomal RNA gene partial sequence internal transcribed spacer 1 5.8S ribosomal RNA gene and internal transcribed spacer 2 complete sequence and large subunit ribosomal RNA gene partial sequence	0.0421308	0.0101917
KT364477.1 Aquilaria beccariana voucher SFN29381 internal transcribed spacer 1 partial sequence 5.8S ribosomal RNA gene complete sequence and internal transcribed spacer 2 partial sequence_{aga}	KY817970.1 Aquilaria crassna voucher ML-6 small subunit ribosomal RNA gene partial sequence internal transcribed spacer 1 5.8S ribosomal RNA gene and internal transcribed spacer 2 complete sequence and large subunit ribosomal RNA gene partial sequence	0.0221534	0.00722737
KX351419.1 Aquilaria beccariana voucher S1 5.8S ribosomal RNA gene partial sequence internal transcribed spacer 2 complete sequence and large subunit ribosomal RNA gene partial sequence_{aga}	KY817970.1 Aquilaria crassna voucher ML-6 small subunit ribosomal RNA gene partial sequence internal transcribed spacer 1 5.8S ribosomal RNA gene and internal transcribed spacer 2 complete sequence and large subunit ribosomal RNA gene partial sequence	0	0
KX424704.1 Aquilaria beccariana 5.8S ribosomal RNA gene partial sequence internal transcribed spacer 2 complete sequence and 28S ribosomal RNA gene partial sequence_{aga}	KY817970.1 Aquilaria crassna voucher ML-6 small subunit ribosomal RNA gene partial sequence internal transcribed spacer 1 5.8S ribosomal RNA gene and internal transcribed spacer 2 complete sequence and large subunit ribosomal RNA gene partial sequence	0.0438711	0.011062
KU238038.1 Aquilaria crassna voucher FBL G11 WC3 internal transcribed spacer 2 partial sequence	KY817970.1 Aquilaria crassna voucher ML-6 small subunit ribosomal RNA gene partial sequence internal transcribed spacer 1 5.8S ribosomal RNA gene and internal transcribed spacer 2 complete sequence and large subunit ribosomal RNA gene partial sequence	0	0
MH134139.1 Aquilaria crassna internal transcribed spacer 1 partial sequence 5.8S ribosomal RNA gene complete sequence and internal transcribed spacer 2 partial sequence	KY817970.1 Aquilaria crassna voucher ML-6 small subunit ribosomal RNA gene partial sequence internal transcribed spacer 1 5.8S ribosomal RNA gene and internal transcribed spacer 2 complete sequence and large subunit ribosomal RNA gene partial sequence	0	0
KU244111.1 Aquilaria crassna voucher FBL01017 internal transcribed spacer 2 partial sequence	KY817970.1 Aquilaria crassna voucher ML-6 small subunit ribosomal RNA gene partial sequence internal transcribed spacer 1 5.8S ribosomal RNA gene and internal transcribed spacer 2 complete sequence and large subunit ribosomal RNA gene partial sequence	0	0
KU244110.1 Aquilaria crassna voucher FBL01014 internal transcribed spacer 2 partial sequence	KY817970.1 Aquilaria crassna voucher ML-6 small subunit ribosomal RNA gene partial sequence internal transcribed spacer 1 5.8S ribosomal RNA gene and internal transcribed spacer 2 complete sequence and large subunit ribosomal RNA gene partial sequence	0	0
KU244109.1 Aquilaria crassna voucher FBL01013 internal transcribed spacer 2 partial sequence	KY817970.1 Aquilaria crassna voucher ML-6 small subunit ribosomal RNA gene partial sequence internal transcribed spacer 1 5.8S ribosomal RNA gene and internal transcribed spacer 2 complete sequence and large subunit ribosomal RNA gene partial sequence	0	0
KU244108.1 Aquilaria crassna voucher FBL01012 internal transcribed spacer 2 partial sequence	KY817970.1 Aquilaria crassna voucher ML-6 small subunit ribosomal RNA gene partial sequence internal transcribed spacer 1 5.8S ribosomal RNA gene and internal transcribed spacer 2 complete sequence and large subunit ribosomal RNA gene partial sequence	0	0
KU238037.1 Aquilaria crassna voucher FBL G10 WC2 internal transcribed spacer 2 partial sequence	KY817970.1 Aquilaria crassna voucher ML-6 small subunit ribosomal RNA gene partial sequence internal transcribed spacer 1 5.8S ribosomal RNA gene and internal transcribed spacer 2 complete sequence and large subunit ribosomal RNA gene partial sequence	0.0027248	0.00273681
KU238035.1 Aquilaria crassna voucher FBL G04 WC1 internal transcribed spacer 2 partial sequence	KY817970.1 Aquilaria crassna voucher ML-6 small subunit ribosomal RNA gene partial sequence internal transcribed spacer 1 5.8S ribosomal RNA gene and internal transcribed spacer 2 complete sequence and large subunit ribosomal RNA gene partial sequence	0.0027248	0.00273681
KU244085.1 Aquilaria crassna voucher FBL01017 internal transcribed spacer 1 partial sequence 5.8S ribosomal RNA gene complete sequence and internal transcribed spacer 2 partial sequence	KY817970.1 Aquilaria crassna voucher ML-6 small subunit ribosomal RNA gene partial sequence internal transcribed spacer 1 5.8S ribosomal RNA gene and internal transcribed spacer 2 complete sequence and large subunit ribosomal RNA gene partial sequence	0	0
KU244084.1 Aquilaria crassna voucher FBL01014 internal transcribed spacer 1 partial sequence 5.8S ribosomal RNA gene complete sequence and internal transcribed spacer 2 partial sequence	KY817970.1 Aquilaria crassna voucher ML-6 small subunit ribosomal RNA gene partial sequence internal transcribed spacer 1 5.8S ribosomal RNA gene and internal transcribed spacer 2 complete sequence and large subunit ribosomal RNA gene partial sequence	0	0
KU244083.1 Aquilaria crassna voucher FBL01013 internal transcribed spacer 1 partial sequence 5.8S ribosomal RNA gene complete sequence and internal transcribed spacer 2 partial sequence_{cra}	KY817970.1 Aquilaria crassna voucher ML-6 small subunit ribosomal RNA gene partial sequence internal transcribed spacer 1 5.8S ribosomal RNA gene and internal transcribed spacer 2 complete sequence and large subunit ribosomal RNA gene partial sequence	0	0
KU244082.1 Aquilaria crassna voucher FBL01012 internal transcribed spacer 1 partial sequence 5.8S ribosomal RNA gene complete sequence and internal transcribed spacer 2 partial sequence	KY817970.1 Aquilaria crassna voucher ML-6 small subunit ribosomal RNA gene partial sequence internal transcribed spacer 1 5.8S ribosomal RNA gene and internal transcribed spacer 2 complete sequence and large subunit ribosomal RNA gene partial sequence	0	0
KT364478.1 Aquilaria crassna voucher FBL01012 internal transcribed spacer 1 partial sequence 5.8S ribosomal RNA gene complete sequence and internal transcribed spacer 2 partial sequence	KY817970.1 Aquilaria crassna voucher ML-6 small subunit ribosomal RNA gene partial sequence internal transcribed spacer 1 5.8S ribosomal RNA gene and internal transcribed spacer 2 complete sequence and large subunit ribosomal RNA gene partial sequence	0	0
KY817982.1 Aquilaria crassna voucher S-9 small subunit ribosomal RNA gene partial sequence internal transcribed spacer 1 5.8S ribosomal RNA gene and internal transcribed spacer 2 complete sequence and large subunit ribosomal RNA gene partial sequence	KY817970.1 Aquilaria crassna voucher ML-6 small subunit ribosomal RNA gene partial sequence internal transcribed spacer 1 5.8S ribosomal RNA gene and internal transcribed spacer 2 complete sequence and large subunit ribosomal RNA gene partial sequence	0	0
KY817979.1 Aquilaria crassna voucher S-1 small subunit ribosomal RNA gene partial sequence internal transcribed spacer 1 5.8S ribosomal RNA gene and internal transcribed spacer 2 complete sequence and large subunit ribosomal RNA gene partial sequence	KY817970.1 Aquilaria crassna voucher ML-6 small subunit ribosomal RNA gene partial sequence internal transcribed spacer 1 5.8S ribosomal RNA gene and internal transcribed spacer 2 complete sequence and large subunit ribosomal RNA gene partial sequence	0	0
KY817973.1 Aquilaria crassna voucher ML-9 small subunit ribosomal RNA gene partial sequence internal transcribed spacer 1 5.8S ribosomal RNA gene and internal transcribed spacer 2 complete sequence and large subunit ribosomal RNA gene partial sequence	KY817970.1 Aquilaria crassna voucher ML-6 small subunit ribosomal RNA gene partial sequence internal transcribed spacer 1 5.8S ribosomal RNA gene and internal transcribed spacer 2 complete sequence and large subunit ribosomal RNA gene partial sequence	0	0
KY817972.1 Aquilaria crassna voucher ML-8 small subunit ribosomal RNA gene partial sequence internal transcribed spacer 1 5.8S ribosomal RNA gene and internal transcribed spacer 2 complete sequence and large subunit ribosomal RNA gene partial sequence	KY817970.1 Aquilaria crassna voucher ML-6 small subunit ribosomal RNA gene partial sequence internal transcribed spacer 1 5.8S ribosomal RNA gene and internal transcribed spacer 2 complete sequence and large subunit ribosomal RNA gene partial sequence	0	0
KY817971.1 Aquilaria crassna voucher ML-7 small subunit ribosomal RNA gene partial sequence internal transcribed spacer 1 5.8S ribosomal RNA gene and internal transcribed spacer 2 complete sequence and large subunit ribosomal RNA gene partial sequence	KY817970.1 Aquilaria crassna voucher ML-6 small subunit ribosomal RNA gene partial sequence internal transcribed spacer 1 5.8S ribosomal RNA gene and internal transcribed spacer 2 complete sequence and large subunit ribosomal RNA gene partial sequence	0	0
MH134137.1 Aquilaria agallochum internal transcribed spacer 1 partial sequence 5.8S ribosomal RNA gene complete sequence and internal transcribed spacer 2 partial sequence_{aga}	KY817969.1 Aquilaria crassna voucher ML-5 small subunit ribosomal RNA gene partial sequence internal transcribed spacer 1 5.8S ribosomal RNA gene and internal transcribed spacer 2 complete sequence and large subunit ribosomal RNA gene partial sequence	0.0165072	0.0059524
KU879012.1 Aquilaria agallochum 18S ribosomal RNA gene partial sequence internal transcribed spacer 1 5.8S ribosomal RNA gene and internal transcribed spacer 2 complete sequence and 28S ribosomal RNA gene partial sequence_{aga}	KY817969.1 Aquilaria crassna voucher ML-5 small subunit ribosomal RNA gene partial sequence internal transcribed spacer 1 5.8S ribosomal RNA gene and internal transcribed spacer 2 complete sequence and large subunit ribosomal RNA gene partial sequence	0.0221253	0.00719082
MH134138.1 Aquilaria beccariana internal transcribed spacer 1 partial sequence 5.8S ribosomal RNA gene complete sequence and internal transcribed spacer 2 partial sequence_{aga}	KY817969.1 Aquilaria crassna voucher ML-5 small subunit ribosomal RNA gene partial sequence internal transcribed spacer 1 5.8S ribosomal RNA gene and internal transcribed spacer 2 complete sequence and large subunit ribosomal RNA gene partial sequence	0.0220708	0.00727399
KT779116.1 Aquilaria beccariana voucher FBL04001 internal transcribed spacer 1 partial sequence 5.8S ribosomal RNA gene complete sequence and internal transcribed spacer 2 partial sequence_{aga}	KY817969.1 Aquilaria crassna voucher ML-5 small subunit ribosomal RNA gene partial sequence internal transcribed spacer 1 5.8S ribosomal RNA gene and internal transcribed spacer 2 complete sequence and large subunit ribosomal RNA gene partial sequence	0.0421308	0.0101917
KT364477.1 Aquilaria beccariana voucher SFN29381 internal transcribed spacer 1 partial sequence 5.8S ribosomal RNA gene complete sequence and internal transcribed spacer 2 partial sequence_{aga}	KY817969.1 Aquilaria crassna voucher ML-5 small subunit ribosomal RNA gene partial sequence internal transcribed spacer 1 5.8S ribosomal RNA gene and internal transcribed spacer 2 complete sequence and large subunit ribosomal RNA gene partial sequence	0.0221534	0.00722737
KX351419.1 Aquilaria beccariana voucher S1 5.8S ribosomal RNA gene partial sequence internal transcribed spacer 2 complete sequence and large subunit ribosomal RNA gene partial sequence_{aga}	KY817969.1 Aquilaria crassna voucher ML-5 small subunit ribosomal RNA gene partial sequence internal transcribed spacer 1 5.8S ribosomal RNA gene and internal transcribed spacer 2 complete sequence and large subunit ribosomal RNA gene partial sequence	0	0
KX424704.1 Aquilaria beccariana 5.8S ribosomal RNA gene partial sequence internal transcribed spacer 2 complete sequence and 28S ribosomal RNA gene partial sequence_{aga}	KY817969.1 Aquilaria crassna voucher ML-5 small subunit ribosomal RNA gene partial sequence internal transcribed spacer 1 5.8S ribosomal RNA gene and internal transcribed spacer 2 complete sequence and large subunit ribosomal RNA gene partial sequence	0.0438711	0.011062
KU238038.1 Aquilaria crassna voucher FBL G11 WC3 internal transcribed spacer 2 partial sequence	KY817969.1 Aquilaria crassna voucher ML-5 small subunit ribosomal RNA gene partial sequence internal transcribed spacer 1 5.8S ribosomal RNA gene and internal transcribed spacer 2 complete sequence and large subunit ribosomal RNA gene partial sequence	0	0
MH134139.1 Aquilaria crassna internal transcribed spacer 1 partial sequence 5.8S ribosomal RNA gene complete sequence and internal transcribed spacer 2 partial sequence	KY817969.1 Aquilaria crassna voucher ML-5 small subunit ribosomal RNA gene partial sequence internal transcribed spacer 1 5.8S ribosomal RNA gene and internal transcribed spacer 2 complete sequence and large subunit ribosomal RNA gene partial sequence	0	0
KU244111.1 Aquilaria crassna voucher FBL01017 internal transcribed spacer 2 partial sequence	KY817969.1 Aquilaria crassna voucher ML-5 small subunit ribosomal RNA gene partial sequence internal transcribed spacer 1 5.8S ribosomal RNA gene and internal transcribed spacer 2 complete sequence and large subunit ribosomal RNA gene partial sequence	0	0
KU244110.1 Aquilaria crassna voucher FBL01014 internal transcribed spacer 2 partial sequence	KY817969.1 Aquilaria crassna voucher ML-5 small subunit ribosomal RNA gene partial sequence internal transcribed spacer 1 5.8S ribosomal RNA gene and internal transcribed spacer 2 complete sequence and large subunit ribosomal RNA gene partial sequence	0	0
KU244109.1 Aquilaria crassna voucher FBL01013 internal transcribed spacer 2 partial sequence	KY817969.1 Aquilaria crassna voucher ML-5 small subunit ribosomal RNA gene partial sequence internal transcribed spacer 1 5.8S ribosomal RNA gene and internal transcribed spacer 2 complete sequence and large subunit ribosomal RNA gene partial sequence	0	0
KU244108.1 Aquilaria crassna voucher FBL01012 internal transcribed spacer 2 partial sequence	KY817969.1 Aquilaria crassna voucher ML-5 small subunit ribosomal RNA gene partial sequence internal transcribed spacer 1 5.8S ribosomal RNA gene and internal transcribed spacer 2 complete sequence and large subunit ribosomal RNA gene partial sequence	0	0
KU238037.1 Aquilaria crassna voucher FBL G10 WC2 internal transcribed spacer 2 partial sequence	KY817969.1 Aquilaria crassna voucher ML-5 small subunit ribosomal RNA gene partial sequence internal transcribed spacer 1 5.8S ribosomal RNA gene and internal transcribed spacer 2 complete sequence and large subunit ribosomal RNA gene partial sequence	0.0027248	0.00273681
KU238035.1 Aquilaria crassna voucher FBL G04 WC1 internal transcribed spacer 2 partial sequence	KY817969.1 Aquilaria crassna voucher ML-5 small subunit ribosomal RNA gene partial sequence internal transcribed spacer 1 5.8S ribosomal RNA gene and internal transcribed spacer 2 complete sequence and large subunit ribosomal RNA gene partial sequence	0.0027248	0.00273681
KU244085.1 Aquilaria crassna voucher FBL01017 internal transcribed spacer 1 partial sequence 5.8S ribosomal RNA gene complete sequence and internal transcribed spacer 2 partial sequence	KY817969.1 Aquilaria crassna voucher ML-5 small subunit ribosomal RNA gene partial sequence internal transcribed spacer 1 5.8S ribosomal RNA gene and internal transcribed spacer 2 complete sequence and large subunit ribosomal RNA gene partial sequence	0	0
KU244084.1 Aquilaria crassna voucher FBL01014 internal transcribed spacer 1 partial sequence 5.8S ribosomal RNA gene complete sequence and internal transcribed spacer 2 partial sequence	KY817969.1 Aquilaria crassna voucher ML-5 small subunit ribosomal RNA gene partial sequence internal transcribed spacer 1 5.8S ribosomal RNA gene and internal transcribed spacer 2 complete sequence and large subunit ribosomal RNA gene partial sequence	0	0
KU244083.1 Aquilaria crassna voucher FBL01013 internal transcribed spacer 1 partial sequence 5.8S ribosomal RNA gene complete sequence and internal transcribed spacer 2 partial sequence_{cra}	KY817969.1 Aquilaria crassna voucher ML-5 small subunit ribosomal RNA gene partial sequence internal transcribed spacer 1 5.8S ribosomal RNA gene and internal transcribed spacer 2 complete sequence and large subunit ribosomal RNA gene partial sequence	0	0
KU244082.1 Aquilaria crassna voucher FBL01012 internal transcribed spacer 1 partial sequence 5.8S ribosomal RNA gene complete sequence and internal transcribed spacer 2 partial sequence	KY817969.1 Aquilaria crassna voucher ML-5 small subunit ribosomal RNA gene partial sequence internal transcribed spacer 1 5.8S ribosomal RNA gene and internal transcribed spacer 2 complete sequence and large subunit ribosomal RNA gene partial sequence	0	0
KT364478.1 Aquilaria crassna voucher FBL01012 internal transcribed spacer 1 partial sequence 5.8S ribosomal RNA gene complete sequence and internal transcribed spacer 2 partial sequence	KY817969.1 Aquilaria crassna voucher ML-5 small subunit ribosomal RNA gene partial sequence internal transcribed spacer 1 5.8S ribosomal RNA gene and internal transcribed spacer 2 complete sequence and large subunit ribosomal RNA gene partial sequence	0	0
KY817982.1 Aquilaria crassna voucher S-9 small subunit ribosomal RNA gene partial sequence internal transcribed spacer 1 5.8S ribosomal RNA gene and internal transcribed spacer 2 complete sequence and large subunit ribosomal RNA gene partial sequence	KY817969.1 Aquilaria crassna voucher ML-5 small subunit ribosomal RNA gene partial sequence internal transcribed spacer 1 5.8S ribosomal RNA gene and internal transcribed spacer 2 complete sequence and large subunit ribosomal RNA gene partial sequence	0	0
KY817979.1 Aquilaria crassna voucher S-1 small subunit ribosomal RNA gene partial sequence internal transcribed spacer 1 5.8S ribosomal RNA gene and internal transcribed spacer 2 complete sequence and large subunit ribosomal RNA gene partial sequence	KY817969.1 Aquilaria crassna voucher ML-5 small subunit ribosomal RNA gene partial sequence internal transcribed spacer 1 5.8S ribosomal RNA gene and internal transcribed spacer 2 complete sequence and large subunit ribosomal RNA gene partial sequence	0	0
KY817973.1 Aquilaria crassna voucher ML-9 small subunit ribosomal RNA gene partial sequence internal transcribed spacer 1 5.8S ribosomal RNA gene and internal transcribed spacer 2 complete sequence and large subunit ribosomal RNA gene partial sequence	KY817969.1 Aquilaria crassna voucher ML-5 small subunit ribosomal RNA gene partial sequence internal transcribed spacer 1 5.8S ribosomal RNA gene and internal transcribed spacer 2 complete sequence and large subunit ribosomal RNA gene partial sequence	0	0
KY817972.1 Aquilaria crassna voucher ML-8 small subunit ribosomal RNA gene partial sequence internal transcribed spacer 1 5.8S ribosomal RNA gene and internal transcribed spacer 2 complete sequence and large subunit ribosomal RNA gene partial sequence	KY817969.1 Aquilaria crassna voucher ML-5 small subunit ribosomal RNA gene partial sequence internal transcribed spacer 1 5.8S ribosomal RNA gene and internal transcribed spacer 2 complete sequence and large subunit ribosomal RNA gene partial sequence	0	0
KY817971.1 Aquilaria crassna voucher ML-7 small subunit ribosomal RNA gene partial sequence internal transcribed spacer 1 5.8S ribosomal RNA gene and internal transcribed spacer 2 complete sequence and large subunit ribosomal RNA gene partial sequence	KY817969.1 Aquilaria crassna voucher ML-5 small subunit ribosomal RNA gene partial sequence internal transcribed spacer 1 5.8S ribosomal RNA gene and internal transcribed spacer 2 complete sequence and large subunit ribosomal RNA gene partial sequence	0	0
KY817970.1 Aquilaria crassna voucher ML-6 small subunit ribosomal RNA gene partial sequence internal transcribed spacer 1 5.8S ribosomal RNA gene and internal transcribed spacer 2 complete sequence and large subunit ribosomal RNA gene partial sequence	KY817969.1 Aquilaria crassna voucher ML-5 small subunit ribosomal RNA gene partial sequence internal transcribed spacer 1 5.8S ribosomal RNA gene and internal transcribed spacer 2 complete sequence and large subunit ribosomal RNA gene partial sequence	0	0
MH134137.1 Aquilaria agallochum internal transcribed spacer 1 partial sequence 5.8S ribosomal RNA gene complete sequence and internal transcribed spacer 2 partial sequence_{aga}	KY817968.1 Aquilaria crassna voucher ML-4 small subunit ribosomal RNA gene partial sequence internal transcribed spacer 1 5.8S ribosomal RNA gene and internal transcribed spacer 2 complete sequence and large subunit ribosomal RNA gene partial sequence	0.0165072	0.0059524
KU879012.1 Aquilaria agallochum 18S ribosomal RNA gene partial sequence internal transcribed spacer 1 5.8S ribosomal RNA gene and internal transcribed spacer 2 complete sequence and 28S ribosomal RNA gene partial sequence_{aga}	KY817968.1 Aquilaria crassna voucher ML-4 small subunit ribosomal RNA gene partial sequence internal transcribed spacer 1 5.8S ribosomal RNA gene and internal transcribed spacer 2 complete sequence and large subunit ribosomal RNA gene partial sequence	0.0221253	0.00719082
MH134138.1 Aquilaria beccariana internal transcribed spacer 1 partial sequence 5.8S ribosomal RNA gene complete sequence and internal transcribed spacer 2 partial sequence_{aga}	KY817968.1 Aquilaria crassna voucher ML-4 small subunit ribosomal RNA gene partial sequence internal transcribed spacer 1 5.8S ribosomal RNA gene and internal transcribed spacer 2 complete sequence and large subunit ribosomal RNA gene partial sequence	0.0220708	0.00727399
KT779116.1 Aquilaria beccariana voucher FBL04001 internal transcribed spacer 1 partial sequence 5.8S ribosomal RNA gene complete sequence and internal transcribed spacer 2 partial sequence_{aga}	KY817968.1 Aquilaria crassna voucher ML-4 small subunit ribosomal RNA gene partial sequence internal transcribed spacer 1 5.8S ribosomal RNA gene and internal transcribed spacer 2 complete sequence and large subunit ribosomal RNA gene partial sequence	0.0421308	0.0101917
KT364477.1 Aquilaria beccariana voucher SFN29381 internal transcribed spacer 1 partial sequence 5.8S ribosomal RNA gene complete sequence and internal transcribed spacer 2 partial sequence_{aga}	KY817968.1 Aquilaria crassna voucher ML-4 small subunit ribosomal RNA gene partial sequence internal transcribed spacer 1 5.8S ribosomal RNA gene and internal transcribed spacer 2 complete sequence and large subunit ribosomal RNA gene partial sequence	0.0221534	0.00722737
KX351419.1 Aquilaria beccariana voucher S1 5.8S ribosomal RNA gene partial sequence internal transcribed spacer 2 complete sequence and large subunit ribosomal RNA gene partial sequence_{aga}	KY817968.1 Aquilaria crassna voucher ML-4 small subunit ribosomal RNA gene partial sequence internal transcribed spacer 1 5.8S ribosomal RNA gene and internal transcribed spacer 2 complete sequence and large subunit ribosomal RNA gene partial sequence	0	0
KX424704.1 Aquilaria beccariana 5.8S ribosomal RNA gene partial sequence internal transcribed spacer 2 complete sequence and 28S ribosomal RNA gene partial sequence_{aga}	KY817968.1 Aquilaria crassna voucher ML-4 small subunit ribosomal RNA gene partial sequence internal transcribed spacer 1 5.8S ribosomal RNA gene and internal transcribed spacer 2 complete sequence and large subunit ribosomal RNA gene partial sequence	0.0438711	0.011062
KU238038.1 Aquilaria crassna voucher FBL G11 WC3 internal transcribed spacer 2 partial sequence	KY817968.1 Aquilaria crassna voucher ML-4 small subunit ribosomal RNA gene partial sequence internal transcribed spacer 1 5.8S ribosomal RNA gene and internal transcribed spacer 2 complete sequence and large subunit ribosomal RNA gene partial sequence	0	0
MH134139.1 Aquilaria crassna internal transcribed spacer 1 partial sequence 5.8S ribosomal RNA gene complete sequence and internal transcribed spacer 2 partial sequence	KY817968.1 Aquilaria crassna voucher ML-4 small subunit ribosomal RNA gene partial sequence internal transcribed spacer 1 5.8S ribosomal RNA gene and internal transcribed spacer 2 complete sequence and large subunit ribosomal RNA gene partial sequence	0	0
KU244111.1 Aquilaria crassna voucher FBL01017 internal transcribed spacer 2 partial sequence	KY817968.1 Aquilaria crassna voucher ML-4 small subunit ribosomal RNA gene partial sequence internal transcribed spacer 1 5.8S ribosomal RNA gene and internal transcribed spacer 2 complete sequence and large subunit ribosomal RNA gene partial sequence	0	0
KU244110.1 Aquilaria crassna voucher FBL01014 internal transcribed spacer 2 partial sequence	KY817968.1 Aquilaria crassna voucher ML-4 small subunit ribosomal RNA gene partial sequence internal transcribed spacer 1 5.8S ribosomal RNA gene and internal transcribed spacer 2 complete sequence and large subunit ribosomal RNA gene partial sequence	0	0
KU244109.1 Aquilaria crassna voucher FBL01013 internal transcribed spacer 2 partial sequence	KY817968.1 Aquilaria crassna voucher ML-4 small subunit ribosomal RNA gene partial sequence internal transcribed spacer 1 5.8S ribosomal RNA gene and internal transcribed spacer 2 complete sequence and large subunit ribosomal RNA gene partial sequence	0	0
KU244108.1 Aquilaria crassna voucher FBL01012 internal transcribed spacer 2 partial sequence	KY817968.1 Aquilaria crassna voucher ML-4 small subunit ribosomal RNA gene partial sequence internal transcribed spacer 1 5.8S ribosomal RNA gene and internal transcribed spacer 2 complete sequence and large subunit ribosomal RNA gene partial sequence	0	0
KU238037.1 Aquilaria crassna voucher FBL G10 WC2 internal transcribed spacer 2 partial sequence	KY817968.1 Aquilaria crassna voucher ML-4 small subunit ribosomal RNA gene partial sequence internal transcribed spacer 1 5.8S ribosomal RNA gene and internal transcribed spacer 2 complete sequence and large subunit ribosomal RNA gene partial sequence	0.0027248	0.00273681
KU238035.1 Aquilaria crassna voucher FBL G04 WC1 internal transcribed spacer 2 partial sequence	KY817968.1 Aquilaria crassna voucher ML-4 small subunit ribosomal RNA gene partial sequence internal transcribed spacer 1 5.8S ribosomal RNA gene and internal transcribed spacer 2 complete sequence and large subunit ribosomal RNA gene partial sequence	0.0027248	0.00273681
KU244085.1 Aquilaria crassna voucher FBL01017 internal transcribed spacer 1 partial sequence 5.8S ribosomal RNA gene complete sequence and internal transcribed spacer 2 partial sequence	KY817968.1 Aquilaria crassna voucher ML-4 small subunit ribosomal RNA gene partial sequence internal transcribed spacer 1 5.8S ribosomal RNA gene and internal transcribed spacer 2 complete sequence and large subunit ribosomal RNA gene partial sequence	0	0
KU244084.1 Aquilaria crassna voucher FBL01014 internal transcribed spacer 1 partial sequence 5.8S ribosomal RNA gene complete sequence and internal transcribed spacer 2 partial sequence	KY817968.1 Aquilaria crassna voucher ML-4 small subunit ribosomal RNA gene partial sequence internal transcribed spacer 1 5.8S ribosomal RNA gene and internal transcribed spacer 2 complete sequence and large subunit ribosomal RNA gene partial sequence	0	0
KU244083.1 Aquilaria crassna voucher FBL01013 internal transcribed spacer 1 partial sequence 5.8S ribosomal RNA gene complete sequence and internal transcribed spacer 2 partial sequence_{cra}	KY817968.1 Aquilaria crassna voucher ML-4 small subunit ribosomal RNA gene partial sequence internal transcribed spacer 1 5.8S ribosomal RNA gene and internal transcribed spacer 2 complete sequence and large subunit ribosomal RNA gene partial sequence	0	0
KU244082.1 Aquilaria crassna voucher FBL01012 internal transcribed spacer 1 partial sequence 5.8S ribosomal RNA gene complete sequence and internal transcribed spacer 2 partial sequence	KY817968.1 Aquilaria crassna voucher ML-4 small subunit ribosomal RNA gene partial sequence internal transcribed spacer 1 5.8S ribosomal RNA gene and internal transcribed spacer 2 complete sequence and large subunit ribosomal RNA gene partial sequence	0	0
KT364478.1 Aquilaria crassna voucher FBL01012 internal transcribed spacer 1 partial sequence 5.8S ribosomal RNA gene complete sequence and internal transcribed spacer 2 partial sequence	KY817968.1 Aquilaria crassna voucher ML-4 small subunit ribosomal RNA gene partial sequence internal transcribed spacer 1 5.8S ribosomal RNA gene and internal transcribed spacer 2 complete sequence and large subunit ribosomal RNA gene partial sequence	0	0
KY817982.1 Aquilaria crassna voucher S-9 small subunit ribosomal RNA gene partial sequence internal transcribed spacer 1 5.8S ribosomal RNA gene and internal transcribed spacer 2 complete sequence and large subunit ribosomal RNA gene partial sequence	KY817968.1 Aquilaria crassna voucher ML-4 small subunit ribosomal RNA gene partial sequence internal transcribed spacer 1 5.8S ribosomal RNA gene and internal transcribed spacer 2 complete sequence and large subunit ribosomal RNA gene partial sequence	0	0
KY817979.1 Aquilaria crassna voucher S-1 small subunit ribosomal RNA gene partial sequence internal transcribed spacer 1 5.8S ribosomal RNA gene and internal transcribed spacer 2 complete sequence and large subunit ribosomal RNA gene partial sequence	KY817968.1 Aquilaria crassna voucher ML-4 small subunit ribosomal RNA gene partial sequence internal transcribed spacer 1 5.8S ribosomal RNA gene and internal transcribed spacer 2 complete sequence and large subunit ribosomal RNA gene partial sequence	0	0
KY817973.1 Aquilaria crassna voucher ML-9 small subunit ribosomal RNA gene partial sequence internal transcribed spacer 1 5.8S ribosomal RNA gene and internal transcribed spacer 2 complete sequence and large subunit ribosomal RNA gene partial sequence	KY817968.1 Aquilaria crassna voucher ML-4 small subunit ribosomal RNA gene partial sequence internal transcribed spacer 1 5.8S ribosomal RNA gene and internal transcribed spacer 2 complete sequence and large subunit ribosomal RNA gene partial sequence	0	0
KY817972.1 Aquilaria crassna voucher ML-8 small subunit ribosomal RNA gene partial sequence internal transcribed spacer 1 5.8S ribosomal RNA gene and internal transcribed spacer 2 complete sequence and large subunit ribosomal RNA gene partial sequence	KY817968.1 Aquilaria crassna voucher ML-4 small subunit ribosomal RNA gene partial sequence internal transcribed spacer 1 5.8S ribosomal RNA gene and internal transcribed spacer 2 complete sequence and large subunit ribosomal RNA gene partial sequence	0	0
KY817971.1 Aquilaria crassna voucher ML-7 small subunit ribosomal RNA gene partial sequence internal transcribed spacer 1 5.8S ribosomal RNA gene and internal transcribed spacer 2 complete sequence and large subunit ribosomal RNA gene partial sequence	KY817968.1 Aquilaria crassna voucher ML-4 small subunit ribosomal RNA gene partial sequence internal transcribed spacer 1 5.8S ribosomal RNA gene and internal transcribed spacer 2 complete sequence and large subunit ribosomal RNA gene partial sequence	0	0
KY817970.1 Aquilaria crassna voucher ML-6 small subunit ribosomal RNA gene partial sequence internal transcribed spacer 1 5.8S ribosomal RNA gene and internal transcribed spacer 2 complete sequence and large subunit ribosomal RNA gene partial sequence	KY817968.1 Aquilaria crassna voucher ML-4 small subunit ribosomal RNA gene partial sequence internal transcribed spacer 1 5.8S ribosomal RNA gene and internal transcribed spacer 2 complete sequence and large subunit ribosomal RNA gene partial sequence	0	0
KY817969.1 Aquilaria crassna voucher ML-5 small subunit ribosomal RNA gene partial sequence internal transcribed spacer 1 5.8S ribosomal RNA gene and internal transcribed spacer 2 complete sequence and large subunit ribosomal RNA gene partial sequence	KY817968.1 Aquilaria crassna voucher ML-4 small subunit ribosomal RNA gene partial sequence internal transcribed spacer 1 5.8S ribosomal RNA gene and internal transcribed spacer 2 complete sequence and large subunit ribosomal RNA gene partial sequence	0	0
MH134137.1 Aquilaria agallochum internal transcribed spacer 1 partial sequence 5.8S ribosomal RNA gene complete sequence and internal transcribed spacer 2 partial sequence_{aga}	KY817967.1 Aquilaria crassna voucher ML-3 small subunit ribosomal RNA gene partial sequence internal transcribed spacer 1 5.8S ribosomal RNA gene and internal transcribed spacer 2 complete sequence and large subunit ribosomal RNA gene partial sequence	0.0165072	0.0059524
KU879012.1 Aquilaria agallochum 18S ribosomal RNA gene partial sequence internal transcribed spacer 1 5.8S ribosomal RNA gene and internal transcribed spacer 2 complete sequence and 28S ribosomal RNA gene partial sequence_{aga}	KY817967.1 Aquilaria crassna voucher ML-3 small subunit ribosomal RNA gene partial sequence internal transcribed spacer 1 5.8S ribosomal RNA gene and internal transcribed spacer 2 complete sequence and large subunit ribosomal RNA gene partial sequence	0.0221253	0.00719082
MH134138.1 Aquilaria beccariana internal transcribed spacer 1 partial sequence 5.8S ribosomal RNA gene complete sequence and internal transcribed spacer 2 partial sequence_{aga}	KY817967.1 Aquilaria crassna voucher ML-3 small subunit ribosomal RNA gene partial sequence internal transcribed spacer 1 5.8S ribosomal RNA gene and internal transcribed spacer 2 complete sequence and large subunit ribosomal RNA gene partial sequence	0.0220708	0.00727399
KT779116.1 Aquilaria beccariana voucher FBL04001 internal transcribed spacer 1 partial sequence 5.8S ribosomal RNA gene complete sequence and internal transcribed spacer 2 partial sequence_{aga}	KY817967.1 Aquilaria crassna voucher ML-3 small subunit ribosomal RNA gene partial sequence internal transcribed spacer 1 5.8S ribosomal RNA gene and internal transcribed spacer 2 complete sequence and large subunit ribosomal RNA gene partial sequence	0.0421308	0.0101917
KT364477.1 Aquilaria beccariana voucher SFN29381 internal transcribed spacer 1 partial sequence 5.8S ribosomal RNA gene complete sequence and internal transcribed spacer 2 partial sequence_{aga}	KY817967.1 Aquilaria crassna voucher ML-3 small subunit ribosomal RNA gene partial sequence internal transcribed spacer 1 5.8S ribosomal RNA gene and internal transcribed spacer 2 complete sequence and large subunit ribosomal RNA gene partial sequence	0.0221534	0.00722737
KX351419.1 Aquilaria beccariana voucher S1 5.8S ribosomal RNA gene partial sequence internal transcribed spacer 2 complete sequence and large subunit ribosomal RNA gene partial sequence_{aga}	KY817967.1 Aquilaria crassna voucher ML-3 small subunit ribosomal RNA gene partial sequence internal transcribed spacer 1 5.8S ribosomal RNA gene and internal transcribed spacer 2 complete sequence and large subunit ribosomal RNA gene partial sequence	0	0
KX424704.1 Aquilaria beccariana 5.8S ribosomal RNA gene partial sequence internal transcribed spacer 2 complete sequence and 28S ribosomal RNA gene partial sequence_{aga}	KY817967.1 Aquilaria crassna voucher ML-3 small subunit ribosomal RNA gene partial sequence internal transcribed spacer 1 5.8S ribosomal RNA gene and internal transcribed spacer 2 complete sequence and large subunit ribosomal RNA gene partial sequence	0.0438711	0.011062
KU238038.1 Aquilaria crassna voucher FBL G11 WC3 internal transcribed spacer 2 partial sequence	KY817967.1 Aquilaria crassna voucher ML-3 small subunit ribosomal RNA gene partial sequence internal transcribed spacer 1 5.8S ribosomal RNA gene and internal transcribed spacer 2 complete sequence and large subunit ribosomal RNA gene partial sequence	0	0
MH134139.1 Aquilaria crassna internal transcribed spacer 1 partial sequence 5.8S ribosomal RNA gene complete sequence and internal transcribed spacer 2 partial sequence	KY817967.1 Aquilaria crassna voucher ML-3 small subunit ribosomal RNA gene partial sequence internal transcribed spacer 1 5.8S ribosomal RNA gene and internal transcribed spacer 2 complete sequence and large subunit ribosomal RNA gene partial sequence	0	0
KU244111.1 Aquilaria crassna voucher FBL01017 internal transcribed spacer 2 partial sequence	KY817967.1 Aquilaria crassna voucher ML-3 small subunit ribosomal RNA gene partial sequence internal transcribed spacer 1 5.8S ribosomal RNA gene and internal transcribed spacer 2 complete sequence and large subunit ribosomal RNA gene partial sequence	0	0
KU244110.1 Aquilaria crassna voucher FBL01014 internal transcribed spacer 2 partial sequence	KY817967.1 Aquilaria crassna voucher ML-3 small subunit ribosomal RNA gene partial sequence internal transcribed spacer 1 5.8S ribosomal RNA gene and internal transcribed spacer 2 complete sequence and large subunit ribosomal RNA gene partial sequence	0	0
KU244109.1 Aquilaria crassna voucher FBL01013 internal transcribed spacer 2 partial sequence	KY817967.1 Aquilaria crassna voucher ML-3 small subunit ribosomal RNA gene partial sequence internal transcribed spacer 1 5.8S ribosomal RNA gene and internal transcribed spacer 2 complete sequence and large subunit ribosomal RNA gene partial sequence	0	0
KU244108.1 Aquilaria crassna voucher FBL01012 internal transcribed spacer 2 partial sequence	KY817967.1 Aquilaria crassna voucher ML-3 small subunit ribosomal RNA gene partial sequence internal transcribed spacer 1 5.8S ribosomal RNA gene and internal transcribed spacer 2 complete sequence and large subunit ribosomal RNA gene partial sequence	0	0
KU238037.1 Aquilaria crassna voucher FBL G10 WC2 internal transcribed spacer 2 partial sequence	KY817967.1 Aquilaria crassna voucher ML-3 small subunit ribosomal RNA gene partial sequence internal transcribed spacer 1 5.8S ribosomal RNA gene and internal transcribed spacer 2 complete sequence and large subunit ribosomal RNA gene partial sequence	0.0027248	0.00273681
KU238035.1 Aquilaria crassna voucher FBL G04 WC1 internal transcribed spacer 2 partial sequence	KY817967.1 Aquilaria crassna voucher ML-3 small subunit ribosomal RNA gene partial sequence internal transcribed spacer 1 5.8S ribosomal RNA gene and internal transcribed spacer 2 complete sequence and large subunit ribosomal RNA gene partial sequence	0.0027248	0.00273681
KU244085.1 Aquilaria crassna voucher FBL01017 internal transcribed spacer 1 partial sequence 5.8S ribosomal RNA gene complete sequence and internal transcribed spacer 2 partial sequence	KY817967.1 Aquilaria crassna voucher ML-3 small subunit ribosomal RNA gene partial sequence internal transcribed spacer 1 5.8S ribosomal RNA gene and internal transcribed spacer 2 complete sequence and large subunit ribosomal RNA gene partial sequence	0	0
KU244084.1 Aquilaria crassna voucher FBL01014 internal transcribed spacer 1 partial sequence 5.8S ribosomal RNA gene complete sequence and internal transcribed spacer 2 partial sequence	KY817967.1 Aquilaria crassna voucher ML-3 small subunit ribosomal RNA gene partial sequence internal transcribed spacer 1 5.8S ribosomal RNA gene and internal transcribed spacer 2 complete sequence and large subunit ribosomal RNA gene partial sequence	0	0
KU244083.1 Aquilaria crassna voucher FBL01013 internal transcribed spacer 1 partial sequence 5.8S ribosomal RNA gene complete sequence and internal transcribed spacer 2 partial sequence_{cra}	KY817967.1 Aquilaria crassna voucher ML-3 small subunit ribosomal RNA gene partial sequence internal transcribed spacer 1 5.8S ribosomal RNA gene and internal transcribed spacer 2 complete sequence and large subunit ribosomal RNA gene partial sequence	0	0
KU244082.1 Aquilaria crassna voucher FBL01012 internal transcribed spacer 1 partial sequence 5.8S ribosomal RNA gene complete sequence and internal transcribed spacer 2 partial sequence	KY817967.1 Aquilaria crassna voucher ML-3 small subunit ribosomal RNA gene partial sequence internal transcribed spacer 1 5.8S ribosomal RNA gene and internal transcribed spacer 2 complete sequence and large subunit ribosomal RNA gene partial sequence	0	0
KT364478.1 Aquilaria crassna voucher FBL01012 internal transcribed spacer 1 partial sequence 5.8S ribosomal RNA gene complete sequence and internal transcribed spacer 2 partial sequence	KY817967.1 Aquilaria crassna voucher ML-3 small subunit ribosomal RNA gene partial sequence internal transcribed spacer 1 5.8S ribosomal RNA gene and internal transcribed spacer 2 complete sequence and large subunit ribosomal RNA gene partial sequence	0	0
KY817982.1 Aquilaria crassna voucher S-9 small subunit ribosomal RNA gene partial sequence internal transcribed spacer 1 5.8S ribosomal RNA gene and internal transcribed spacer 2 complete sequence and large subunit ribosomal RNA gene partial sequence	KY817967.1 Aquilaria crassna voucher ML-3 small subunit ribosomal RNA gene partial sequence internal transcribed spacer 1 5.8S ribosomal RNA gene and internal transcribed spacer 2 complete sequence and large subunit ribosomal RNA gene partial sequence	0	0
KY817979.1 Aquilaria crassna voucher S-1 small subunit ribosomal RNA gene partial sequence internal transcribed spacer 1 5.8S ribosomal RNA gene and internal transcribed spacer 2 complete sequence and large subunit ribosomal RNA gene partial sequence	KY817967.1 Aquilaria crassna voucher ML-3 small subunit ribosomal RNA gene partial sequence internal transcribed spacer 1 5.8S ribosomal RNA gene and internal transcribed spacer 2 complete sequence and large subunit ribosomal RNA gene partial sequence	0	0
KY817973.1 Aquilaria crassna voucher ML-9 small subunit ribosomal RNA gene partial sequence internal transcribed spacer 1 5.8S ribosomal RNA gene and internal transcribed spacer 2 complete sequence and large subunit ribosomal RNA gene partial sequence	KY817967.1 Aquilaria crassna voucher ML-3 small subunit ribosomal RNA gene partial sequence internal transcribed spacer 1 5.8S ribosomal RNA gene and internal transcribed spacer 2 complete sequence and large subunit ribosomal RNA gene partial sequence	0	0
KY817972.1 Aquilaria crassna voucher ML-8 small subunit ribosomal RNA gene partial sequence internal transcribed spacer 1 5.8S ribosomal RNA gene and internal transcribed spacer 2 complete sequence and large subunit ribosomal RNA gene partial sequence	KY817967.1 Aquilaria crassna voucher ML-3 small subunit ribosomal RNA gene partial sequence internal transcribed spacer 1 5.8S ribosomal RNA gene and internal transcribed spacer 2 complete sequence and large subunit ribosomal RNA gene partial sequence	0	0
KY817971.1 Aquilaria crassna voucher ML-7 small subunit ribosomal RNA gene partial sequence internal transcribed spacer 1 5.8S ribosomal RNA gene and internal transcribed spacer 2 complete sequence and large subunit ribosomal RNA gene partial sequence	KY817967.1 Aquilaria crassna voucher ML-3 small subunit ribosomal RNA gene partial sequence internal transcribed spacer 1 5.8S ribosomal RNA gene and internal transcribed spacer 2 complete sequence and large subunit ribosomal RNA gene partial sequence	0	0
KY817970.1 Aquilaria crassna voucher ML-6 small subunit ribosomal RNA gene partial sequence internal transcribed spacer 1 5.8S ribosomal RNA gene and internal transcribed spacer 2 complete sequence and large subunit ribosomal RNA gene partial sequence	KY817967.1 Aquilaria crassna voucher ML-3 small subunit ribosomal RNA gene partial sequence internal transcribed spacer 1 5.8S ribosomal RNA gene and internal transcribed spacer 2 complete sequence and large subunit ribosomal RNA gene partial sequence	0	0
KY817969.1 Aquilaria crassna voucher ML-5 small subunit ribosomal RNA gene partial sequence internal transcribed spacer 1 5.8S ribosomal RNA gene and internal transcribed spacer 2 complete sequence and large subunit ribosomal RNA gene partial sequence	KY817967.1 Aquilaria crassna voucher ML-3 small subunit ribosomal RNA gene partial sequence internal transcribed spacer 1 5.8S ribosomal RNA gene and internal transcribed spacer 2 complete sequence and large subunit ribosomal RNA gene partial sequence	0	0
KY817968.1 Aquilaria crassna voucher ML-4 small subunit ribosomal RNA gene partial sequence internal transcribed spacer 1 5.8S ribosomal RNA gene and internal transcribed spacer 2 complete sequence and large subunit ribosomal RNA gene partial sequence	KY817967.1 Aquilaria crassna voucher ML-3 small subunit ribosomal RNA gene partial sequence internal transcribed spacer 1 5.8S ribosomal RNA gene and internal transcribed spacer 2 complete sequence and large subunit ribosomal RNA gene partial sequence	0	0
MH134137.1 Aquilaria agallochum internal transcribed spacer 1 partial sequence 5.8S ribosomal RNA gene complete sequence and internal transcribed spacer 2 partial sequence_{aga}	KY817964.1 Aquilaria crassna voucher CS-13 small subunit ribosomal RNA gene partial sequence internal transcribed spacer 1 5.8S ribosomal RNA gene and internal transcribed spacer 2 complete sequence and large subunit ribosomal RNA gene partial sequence	0.0165072	0.0059524
KU879012.1 Aquilaria agallochum 18S ribosomal RNA gene partial sequence internal transcribed spacer 1 5.8S ribosomal RNA gene and internal transcribed spacer 2 complete sequence and 28S ribosomal RNA gene partial sequence_{aga}	KY817964.1 Aquilaria crassna voucher CS-13 small subunit ribosomal RNA gene partial sequence internal transcribed spacer 1 5.8S ribosomal RNA gene and internal transcribed spacer 2 complete sequence and large subunit ribosomal RNA gene partial sequence	0.0221253	0.00719082
MH134138.1 Aquilaria beccariana internal transcribed spacer 1 partial sequence 5.8S ribosomal RNA gene complete sequence and internal transcribed spacer 2 partial sequence_{aga}	KY817964.1 Aquilaria crassna voucher CS-13 small subunit ribosomal RNA gene partial sequence internal transcribed spacer 1 5.8S ribosomal RNA gene and internal transcribed spacer 2 complete sequence and large subunit ribosomal RNA gene partial sequence	0.0220708	0.00727399
KT779116.1 Aquilaria beccariana voucher FBL04001 internal transcribed spacer 1 partial sequence 5.8S ribosomal RNA gene complete sequence and internal transcribed spacer 2 partial sequence_{aga}	KY817964.1 Aquilaria crassna voucher CS-13 small subunit ribosomal RNA gene partial sequence internal transcribed spacer 1 5.8S ribosomal RNA gene and internal transcribed spacer 2 complete sequence and large subunit ribosomal RNA gene partial sequence	0.0421308	0.0101917
KT364477.1 Aquilaria beccariana voucher SFN29381 internal transcribed spacer 1 partial sequence 5.8S ribosomal RNA gene complete sequence and internal transcribed spacer 2 partial sequence_{aga}	KY817964.1 Aquilaria crassna voucher CS-13 small subunit ribosomal RNA gene partial sequence internal transcribed spacer 1 5.8S ribosomal RNA gene and internal transcribed spacer 2 complete sequence and large subunit ribosomal RNA gene partial sequence	0.0221534	0.00722737
KX351419.1 Aquilaria beccariana voucher S1 5.8S ribosomal RNA gene partial sequence internal transcribed spacer 2 complete sequence and large subunit ribosomal RNA gene partial sequence_{aga}	KY817964.1 Aquilaria crassna voucher CS-13 small subunit ribosomal RNA gene partial sequence internal transcribed spacer 1 5.8S ribosomal RNA gene and internal transcribed spacer 2 complete sequence and large subunit ribosomal RNA gene partial sequence	0	0
KX424704.1 Aquilaria beccariana 5.8S ribosomal RNA gene partial sequence internal transcribed spacer 2 complete sequence and 28S ribosomal RNA gene partial sequence_{aga}	KY817964.1 Aquilaria crassna voucher CS-13 small subunit ribosomal RNA gene partial sequence internal transcribed spacer 1 5.8S ribosomal RNA gene and internal transcribed spacer 2 complete sequence and large subunit ribosomal RNA gene partial sequence	0.0438711	0.011062
KU238038.1 Aquilaria crassna voucher FBL G11 WC3 internal transcribed spacer 2 partial sequence	KY817964.1 Aquilaria crassna voucher CS-13 small subunit ribosomal RNA gene partial sequence internal transcribed spacer 1 5.8S ribosomal RNA gene and internal transcribed spacer 2 complete sequence and large subunit ribosomal RNA gene partial sequence	0	0
MH134139.1 Aquilaria crassna internal transcribed spacer 1 partial sequence 5.8S ribosomal RNA gene complete sequence and internal transcribed spacer 2 partial sequence	KY817964.1 Aquilaria crassna voucher CS-13 small subunit ribosomal RNA gene partial sequence internal transcribed spacer 1 5.8S ribosomal RNA gene and internal transcribed spacer 2 complete sequence and large subunit ribosomal RNA gene partial sequence	0	0
KU244111.1 Aquilaria crassna voucher FBL01017 internal transcribed spacer 2 partial sequence	KY817964.1 Aquilaria crassna voucher CS-13 small subunit ribosomal RNA gene partial sequence internal transcribed spacer 1 5.8S ribosomal RNA gene and internal transcribed spacer 2 complete sequence and large subunit ribosomal RNA gene partial sequence	0	0
KU244110.1 Aquilaria crassna voucher FBL01014 internal transcribed spacer 2 partial sequence	KY817964.1 Aquilaria crassna voucher CS-13 small subunit ribosomal RNA gene partial sequence internal transcribed spacer 1 5.8S ribosomal RNA gene and internal transcribed spacer 2 complete sequence and large subunit ribosomal RNA gene partial sequence	0	0
KU244109.1 Aquilaria crassna voucher FBL01013 internal transcribed spacer 2 partial sequence	KY817964.1 Aquilaria crassna voucher CS-13 small subunit ribosomal RNA gene partial sequence internal transcribed spacer 1 5.8S ribosomal RNA gene and internal transcribed spacer 2 complete sequence and large subunit ribosomal RNA gene partial sequence	0	0
KU244108.1 Aquilaria crassna voucher FBL01012 internal transcribed spacer 2 partial sequence	KY817964.1 Aquilaria crassna voucher CS-13 small subunit ribosomal RNA gene partial sequence internal transcribed spacer 1 5.8S ribosomal RNA gene and internal transcribed spacer 2 complete sequence and large subunit ribosomal RNA gene partial sequence	0	0
KU238037.1 Aquilaria crassna voucher FBL G10 WC2 internal transcribed spacer 2 partial sequence	KY817964.1 Aquilaria crassna voucher CS-13 small subunit ribosomal RNA gene partial sequence internal transcribed spacer 1 5.8S ribosomal RNA gene and internal transcribed spacer 2 complete sequence and large subunit ribosomal RNA gene partial sequence	0.0027248	0.00273681
KU238035.1 Aquilaria crassna voucher FBL G04 WC1 internal transcribed spacer 2 partial sequence	KY817964.1 Aquilaria crassna voucher CS-13 small subunit ribosomal RNA gene partial sequence internal transcribed spacer 1 5.8S ribosomal RNA gene and internal transcribed spacer 2 complete sequence and large subunit ribosomal RNA gene partial sequence	0.0027248	0.00273681
KU244085.1 Aquilaria crassna voucher FBL01017 internal transcribed spacer 1 partial sequence 5.8S ribosomal RNA gene complete sequence and internal transcribed spacer 2 partial sequence	KY817964.1 Aquilaria crassna voucher CS-13 small subunit ribosomal RNA gene partial sequence internal transcribed spacer 1 5.8S ribosomal RNA gene and internal transcribed spacer 2 complete sequence and large subunit ribosomal RNA gene partial sequence	0	0
KU244084.1 Aquilaria crassna voucher FBL01014 internal transcribed spacer 1 partial sequence 5.8S ribosomal RNA gene complete sequence and internal transcribed spacer 2 partial sequence	KY817964.1 Aquilaria crassna voucher CS-13 small subunit ribosomal RNA gene partial sequence internal transcribed spacer 1 5.8S ribosomal RNA gene and internal transcribed spacer 2 complete sequence and large subunit ribosomal RNA gene partial sequence	0	0
KU244083.1 Aquilaria crassna voucher FBL01013 internal transcribed spacer 1 partial sequence 5.8S ribosomal RNA gene complete sequence and internal transcribed spacer 2 partial sequence_{cra}	KY817964.1 Aquilaria crassna voucher CS-13 small subunit ribosomal RNA gene partial sequence internal transcribed spacer 1 5.8S ribosomal RNA gene and internal transcribed spacer 2 complete sequence and large subunit ribosomal RNA gene partial sequence	0	0
KU244082.1 Aquilaria crassna voucher FBL01012 internal transcribed spacer 1 partial sequence 5.8S ribosomal RNA gene complete sequence and internal transcribed spacer 2 partial sequence	KY817964.1 Aquilaria crassna voucher CS-13 small subunit ribosomal RNA gene partial sequence internal transcribed spacer 1 5.8S ribosomal RNA gene and internal transcribed spacer 2 complete sequence and large subunit ribosomal RNA gene partial sequence	0	0
KT364478.1 Aquilaria crassna voucher FBL01012 internal transcribed spacer 1 partial sequence 5.8S ribosomal RNA gene complete sequence and internal transcribed spacer 2 partial sequence	KY817964.1 Aquilaria crassna voucher CS-13 small subunit ribosomal RNA gene partial sequence internal transcribed spacer 1 5.8S ribosomal RNA gene and internal transcribed spacer 2 complete sequence and large subunit ribosomal RNA gene partial sequence	0	0
KY817982.1 Aquilaria crassna voucher S-9 small subunit ribosomal RNA gene partial sequence internal transcribed spacer 1 5.8S ribosomal RNA gene and internal transcribed spacer 2 complete sequence and large subunit ribosomal RNA gene partial sequence	KY817964.1 Aquilaria crassna voucher CS-13 small subunit ribosomal RNA gene partial sequence internal transcribed spacer 1 5.8S ribosomal RNA gene and internal transcribed spacer 2 complete sequence and large subunit ribosomal RNA gene partial sequence	0	0
KY817979.1 Aquilaria crassna voucher S-1 small subunit ribosomal RNA gene partial sequence internal transcribed spacer 1 5.8S ribosomal RNA gene and internal transcribed spacer 2 complete sequence and large subunit ribosomal RNA gene partial sequence	KY817964.1 Aquilaria crassna voucher CS-13 small subunit ribosomal RNA gene partial sequence internal transcribed spacer 1 5.8S ribosomal RNA gene and internal transcribed spacer 2 complete sequence and large subunit ribosomal RNA gene partial sequence	0	0
KY817973.1 Aquilaria crassna voucher ML-9 small subunit ribosomal RNA gene partial sequence internal transcribed spacer 1 5.8S ribosomal RNA gene and internal transcribed spacer 2 complete sequence and large subunit ribosomal RNA gene partial sequence	KY817964.1 Aquilaria crassna voucher CS-13 small subunit ribosomal RNA gene partial sequence internal transcribed spacer 1 5.8S ribosomal RNA gene and internal transcribed spacer 2 complete sequence and large subunit ribosomal RNA gene partial sequence	0	0
KY817972.1 Aquilaria crassna voucher ML-8 small subunit ribosomal RNA gene partial sequence internal transcribed spacer 1 5.8S ribosomal RNA gene and internal transcribed spacer 2 complete sequence and large subunit ribosomal RNA gene partial sequence	KY817964.1 Aquilaria crassna voucher CS-13 small subunit ribosomal RNA gene partial sequence internal transcribed spacer 1 5.8S ribosomal RNA gene and internal transcribed spacer 2 complete sequence and large subunit ribosomal RNA gene partial sequence	0	0
KY817971.1 Aquilaria crassna voucher ML-7 small subunit ribosomal RNA gene partial sequence internal transcribed spacer 1 5.8S ribosomal RNA gene and internal transcribed spacer 2 complete sequence and large subunit ribosomal RNA gene partial sequence	KY817964.1 Aquilaria crassna voucher CS-13 small subunit ribosomal RNA gene partial sequence internal transcribed spacer 1 5.8S ribosomal RNA gene and internal transcribed spacer 2 complete sequence and large subunit ribosomal RNA gene partial sequence	0	0
KY817970.1 Aquilaria crassna voucher ML-6 small subunit ribosomal RNA gene partial sequence internal transcribed spacer 1 5.8S ribosomal RNA gene and internal transcribed spacer 2 complete sequence and large subunit ribosomal RNA gene partial sequence	KY817964.1 Aquilaria crassna voucher CS-13 small subunit ribosomal RNA gene partial sequence internal transcribed spacer 1 5.8S ribosomal RNA gene and internal transcribed spacer 2 complete sequence and large subunit ribosomal RNA gene partial sequence	0	0
KY817969.1 Aquilaria crassna voucher ML-5 small subunit ribosomal RNA gene partial sequence internal transcribed spacer 1 5.8S ribosomal RNA gene and internal transcribed spacer 2 complete sequence and large subunit ribosomal RNA gene partial sequence	KY817964.1 Aquilaria crassna voucher CS-13 small subunit ribosomal RNA gene partial sequence internal transcribed spacer 1 5.8S ribosomal RNA gene and internal transcribed spacer 2 complete sequence and large subunit ribosomal RNA gene partial sequence	0	0
KY817968.1 Aquilaria crassna voucher ML-4 small subunit ribosomal RNA gene partial sequence internal transcribed spacer 1 5.8S ribosomal RNA gene and internal transcribed spacer 2 complete sequence and large subunit ribosomal RNA gene partial sequence	KY817964.1 Aquilaria crassna voucher CS-13 small subunit ribosomal RNA gene partial sequence internal transcribed spacer 1 5.8S ribosomal RNA gene and internal transcribed spacer 2 complete sequence and large subunit ribosomal RNA gene partial sequence	0	0
KY817967.1 Aquilaria crassna voucher ML-3 small subunit ribosomal RNA gene partial sequence internal transcribed spacer 1 5.8S ribosomal RNA gene and internal transcribed spacer 2 complete sequence and large subunit ribosomal RNA gene partial sequence	KY817964.1 Aquilaria crassna voucher CS-13 small subunit ribosomal RNA gene partial sequence internal transcribed spacer 1 5.8S ribosomal RNA gene and internal transcribed spacer 2 complete sequence and large subunit ribosomal RNA gene partial sequence	0	0
MH134137.1 Aquilaria agallochum internal transcribed spacer 1 partial sequence 5.8S ribosomal RNA gene complete sequence and internal transcribed spacer 2 partial sequence_{aga}	KY817963.1 Aquilaria crassna voucher CS-12 small subunit ribosomal RNA gene partial sequence internal transcribed spacer 1 5.8S ribosomal RNA gene and internal transcribed spacer 2 complete sequence and large subunit ribosomal RNA gene partial sequence	0.0165072	0.0059524
KU879012.1 Aquilaria agallochum 18S ribosomal RNA gene partial sequence internal transcribed spacer 1 5.8S ribosomal RNA gene and internal transcribed spacer 2 complete sequence and 28S ribosomal RNA gene partial sequence_{aga}	KY817963.1 Aquilaria crassna voucher CS-12 small subunit ribosomal RNA gene partial sequence internal transcribed spacer 1 5.8S ribosomal RNA gene and internal transcribed spacer 2 complete sequence and large subunit ribosomal RNA gene partial sequence	0.0221253	0.00719082
MH134138.1 Aquilaria beccariana internal transcribed spacer 1 partial sequence 5.8S ribosomal RNA gene complete sequence and internal transcribed spacer 2 partial sequence_{aga}	KY817963.1 Aquilaria crassna voucher CS-12 small subunit ribosomal RNA gene partial sequence internal transcribed spacer 1 5.8S ribosomal RNA gene and internal transcribed spacer 2 complete sequence and large subunit ribosomal RNA gene partial sequence	0.0220708	0.00727399
KT779116.1 Aquilaria beccariana voucher FBL04001 internal transcribed spacer 1 partial sequence 5.8S ribosomal RNA gene complete sequence and internal transcribed spacer 2 partial sequence_{aga}	KY817963.1 Aquilaria crassna voucher CS-12 small subunit ribosomal RNA gene partial sequence internal transcribed spacer 1 5.8S ribosomal RNA gene and internal transcribed spacer 2 complete sequence and large subunit ribosomal RNA gene partial sequence	0.0421308	0.0101917
KT364477.1 Aquilaria beccariana voucher SFN29381 internal transcribed spacer 1 partial sequence 5.8S ribosomal RNA gene complete sequence and internal transcribed spacer 2 partial sequence_{aga}	KY817963.1 Aquilaria crassna voucher CS-12 small subunit ribosomal RNA gene partial sequence internal transcribed spacer 1 5.8S ribosomal RNA gene and internal transcribed spacer 2 complete sequence and large subunit ribosomal RNA gene partial sequence	0.0221534	0.00722737
KX351419.1 Aquilaria beccariana voucher S1 5.8S ribosomal RNA gene partial sequence internal transcribed spacer 2 complete sequence and large subunit ribosomal RNA gene partial sequence_{aga}	KY817963.1 Aquilaria crassna voucher CS-12 small subunit ribosomal RNA gene partial sequence internal transcribed spacer 1 5.8S ribosomal RNA gene and internal transcribed spacer 2 complete sequence and large subunit ribosomal RNA gene partial sequence	0	0
KX424704.1 Aquilaria beccariana 5.8S ribosomal RNA gene partial sequence internal transcribed spacer 2 complete sequence and 28S ribosomal RNA gene partial sequence_{aga}	KY817963.1 Aquilaria crassna voucher CS-12 small subunit ribosomal RNA gene partial sequence internal transcribed spacer 1 5.8S ribosomal RNA gene and internal transcribed spacer 2 complete sequence and large subunit ribosomal RNA gene partial sequence	0.0438711	0.011062
KU238038.1 Aquilaria crassna voucher FBL G11 WC3 internal transcribed spacer 2 partial sequence	KY817963.1 Aquilaria crassna voucher CS-12 small subunit ribosomal RNA gene partial sequence internal transcribed spacer 1 5.8S ribosomal RNA gene and internal transcribed spacer 2 complete sequence and large subunit ribosomal RNA gene partial sequence	0	0
MH134139.1 Aquilaria crassna internal transcribed spacer 1 partial sequence 5.8S ribosomal RNA gene complete sequence and internal transcribed spacer 2 partial sequence	KY817963.1 Aquilaria crassna voucher CS-12 small subunit ribosomal RNA gene partial sequence internal transcribed spacer 1 5.8S ribosomal RNA gene and internal transcribed spacer 2 complete sequence and large subunit ribosomal RNA gene partial sequence	0	0
KU244111.1 Aquilaria crassna voucher FBL01017 internal transcribed spacer 2 partial sequence	KY817963.1 Aquilaria crassna voucher CS-12 small subunit ribosomal RNA gene partial sequence internal transcribed spacer 1 5.8S ribosomal RNA gene and internal transcribed spacer 2 complete sequence and large subunit ribosomal RNA gene partial sequence	0	0
KU244110.1 Aquilaria crassna voucher FBL01014 internal transcribed spacer 2 partial sequence	KY817963.1 Aquilaria crassna voucher CS-12 small subunit ribosomal RNA gene partial sequence internal transcribed spacer 1 5.8S ribosomal RNA gene and internal transcribed spacer 2 complete sequence and large subunit ribosomal RNA gene partial sequence	0	0
KU244109.1 Aquilaria crassna voucher FBL01013 internal transcribed spacer 2 partial sequence	KY817963.1 Aquilaria crassna voucher CS-12 small subunit ribosomal RNA gene partial sequence internal transcribed spacer 1 5.8S ribosomal RNA gene and internal transcribed spacer 2 complete sequence and large subunit ribosomal RNA gene partial sequence	0	0
KU244108.1 Aquilaria crassna voucher FBL01012 internal transcribed spacer 2 partial sequence	KY817963.1 Aquilaria crassna voucher CS-12 small subunit ribosomal RNA gene partial sequence internal transcribed spacer 1 5.8S ribosomal RNA gene and internal transcribed spacer 2 complete sequence and large subunit ribosomal RNA gene partial sequence	0	0
KU238037.1 Aquilaria crassna voucher FBL G10 WC2 internal transcribed spacer 2 partial sequence	KY817963.1 Aquilaria crassna voucher CS-12 small subunit ribosomal RNA gene partial sequence internal transcribed spacer 1 5.8S ribosomal RNA gene and internal transcribed spacer 2 complete sequence and large subunit ribosomal RNA gene partial sequence	0.0027248	0.00273681
KU238035.1 Aquilaria crassna voucher FBL G04 WC1 internal transcribed spacer 2 partial sequence	KY817963.1 Aquilaria crassna voucher CS-12 small subunit ribosomal RNA gene partial sequence internal transcribed spacer 1 5.8S ribosomal RNA gene and internal transcribed spacer 2 complete sequence and large subunit ribosomal RNA gene partial sequence	0.0027248	0.00273681
KU244085.1 Aquilaria crassna voucher FBL01017 internal transcribed spacer 1 partial sequence 5.8S ribosomal RNA gene complete sequence and internal transcribed spacer 2 partial sequence	KY817963.1 Aquilaria crassna voucher CS-12 small subunit ribosomal RNA gene partial sequence internal transcribed spacer 1 5.8S ribosomal RNA gene and internal transcribed spacer 2 complete sequence and large subunit ribosomal RNA gene partial sequence	0	0
KU244084.1 Aquilaria crassna voucher FBL01014 internal transcribed spacer 1 partial sequence 5.8S ribosomal RNA gene complete sequence and internal transcribed spacer 2 partial sequence	KY817963.1 Aquilaria crassna voucher CS-12 small subunit ribosomal RNA gene partial sequence internal transcribed spacer 1 5.8S ribosomal RNA gene and internal transcribed spacer 2 complete sequence and large subunit ribosomal RNA gene partial sequence	0	0
KU244083.1 Aquilaria crassna voucher FBL01013 internal transcribed spacer 1 partial sequence 5.8S ribosomal RNA gene complete sequence and internal transcribed spacer 2 partial sequence_{cra}	KY817963.1 Aquilaria crassna voucher CS-12 small subunit ribosomal RNA gene partial sequence internal transcribed spacer 1 5.8S ribosomal RNA gene and internal transcribed spacer 2 complete sequence and large subunit ribosomal RNA gene partial sequence	0	0
KU244082.1 Aquilaria crassna voucher FBL01012 internal transcribed spacer 1 partial sequence 5.8S ribosomal RNA gene complete sequence and internal transcribed spacer 2 partial sequence	KY817963.1 Aquilaria crassna voucher CS-12 small subunit ribosomal RNA gene partial sequence internal transcribed spacer 1 5.8S ribosomal RNA gene and internal transcribed spacer 2 complete sequence and large subunit ribosomal RNA gene partial sequence	0	0
KT364478.1 Aquilaria crassna voucher FBL01012 internal transcribed spacer 1 partial sequence 5.8S ribosomal RNA gene complete sequence and internal transcribed spacer 2 partial sequence	KY817963.1 Aquilaria crassna voucher CS-12 small subunit ribosomal RNA gene partial sequence internal transcribed spacer 1 5.8S ribosomal RNA gene and internal transcribed spacer 2 complete sequence and large subunit ribosomal RNA gene partial sequence	0	0
KY817982.1 Aquilaria crassna voucher S-9 small subunit ribosomal RNA gene partial sequence internal transcribed spacer 1 5.8S ribosomal RNA gene and internal transcribed spacer 2 complete sequence and large subunit ribosomal RNA gene partial sequence	KY817963.1 Aquilaria crassna voucher CS-12 small subunit ribosomal RNA gene partial sequence internal transcribed spacer 1 5.8S ribosomal RNA gene and internal transcribed spacer 2 complete sequence and large subunit ribosomal RNA gene partial sequence	0	0
KY817979.1 Aquilaria crassna voucher S-1 small subunit ribosomal RNA gene partial sequence internal transcribed spacer 1 5.8S ribosomal RNA gene and internal transcribed spacer 2 complete sequence and large subunit ribosomal RNA gene partial sequence	KY817963.1 Aquilaria crassna voucher CS-12 small subunit ribosomal RNA gene partial sequence internal transcribed spacer 1 5.8S ribosomal RNA gene and internal transcribed spacer 2 complete sequence and large subunit ribosomal RNA gene partial sequence	0	0
KY817973.1 Aquilaria crassna voucher ML-9 small subunit ribosomal RNA gene partial sequence internal transcribed spacer 1 5.8S ribosomal RNA gene and internal transcribed spacer 2 complete sequence and large subunit ribosomal RNA gene partial sequence	KY817963.1 Aquilaria crassna voucher CS-12 small subunit ribosomal RNA gene partial sequence internal transcribed spacer 1 5.8S ribosomal RNA gene and internal transcribed spacer 2 complete sequence and large subunit ribosomal RNA gene partial sequence	0	0
KY817972.1 Aquilaria crassna voucher ML-8 small subunit ribosomal RNA gene partial sequence internal transcribed spacer 1 5.8S ribosomal RNA gene and internal transcribed spacer 2 complete sequence and large subunit ribosomal RNA gene partial sequence	KY817963.1 Aquilaria crassna voucher CS-12 small subunit ribosomal RNA gene partial sequence internal transcribed spacer 1 5.8S ribosomal RNA gene and internal transcribed spacer 2 complete sequence and large subunit ribosomal RNA gene partial sequence	0	0
KY817971.1 Aquilaria crassna voucher ML-7 small subunit ribosomal RNA gene partial sequence internal transcribed spacer 1 5.8S ribosomal RNA gene and internal transcribed spacer 2 complete sequence and large subunit ribosomal RNA gene partial sequence	KY817963.1 Aquilaria crassna voucher CS-12 small subunit ribosomal RNA gene partial sequence internal transcribed spacer 1 5.8S ribosomal RNA gene and internal transcribed spacer 2 complete sequence and large subunit ribosomal RNA gene partial sequence	0	0
KY817970.1 Aquilaria crassna voucher ML-6 small subunit ribosomal RNA gene partial sequence internal transcribed spacer 1 5.8S ribosomal RNA gene and internal transcribed spacer 2 complete sequence and large subunit ribosomal RNA gene partial sequence	KY817963.1 Aquilaria crassna voucher CS-12 small subunit ribosomal RNA gene partial sequence internal transcribed spacer 1 5.8S ribosomal RNA gene and internal transcribed spacer 2 complete sequence and large subunit ribosomal RNA gene partial sequence	0	0
KY817969.1 Aquilaria crassna voucher ML-5 small subunit ribosomal RNA gene partial sequence internal transcribed spacer 1 5.8S ribosomal RNA gene and internal transcribed spacer 2 complete sequence and large subunit ribosomal RNA gene partial sequence	KY817963.1 Aquilaria crassna voucher CS-12 small subunit ribosomal RNA gene partial sequence internal transcribed spacer 1 5.8S ribosomal RNA gene and internal transcribed spacer 2 complete sequence and large subunit ribosomal RNA gene partial sequence	0	0
KY817968.1 Aquilaria crassna voucher ML-4 small subunit ribosomal RNA gene partial sequence internal transcribed spacer 1 5.8S ribosomal RNA gene and internal transcribed spacer 2 complete sequence and large subunit ribosomal RNA gene partial sequence	KY817963.1 Aquilaria crassna voucher CS-12 small subunit ribosomal RNA gene partial sequence internal transcribed spacer 1 5.8S ribosomal RNA gene and internal transcribed spacer 2 complete sequence and large subunit ribosomal RNA gene partial sequence	0	0
KY817967.1 Aquilaria crassna voucher ML-3 small subunit ribosomal RNA gene partial sequence internal transcribed spacer 1 5.8S ribosomal RNA gene and internal transcribed spacer 2 complete sequence and large subunit ribosomal RNA gene partial sequence	KY817963.1 Aquilaria crassna voucher CS-12 small subunit ribosomal RNA gene partial sequence internal transcribed spacer 1 5.8S ribosomal RNA gene and internal transcribed spacer 2 complete sequence and large subunit ribosomal RNA gene partial sequence	0	0
KY817964.1 Aquilaria crassna voucher CS-13 small subunit ribosomal RNA gene partial sequence internal transcribed spacer 1 5.8S ribosomal RNA gene and internal transcribed spacer 2 complete sequence and large subunit ribosomal RNA gene partial sequence	KY817963.1 Aquilaria crassna voucher CS-12 small subunit ribosomal RNA gene partial sequence internal transcribed spacer 1 5.8S ribosomal RNA gene and internal transcribed spacer 2 complete sequence and large subunit ribosomal RNA gene partial sequence	0	0
MH134137.1 Aquilaria agallochum internal transcribed spacer 1 partial sequence 5.8S ribosomal RNA gene complete sequence and internal transcribed spacer 2 partial sequence_{aga}	KY817962.1 Aquilaria crassna voucher CS-11 small subunit ribosomal RNA gene partial sequence internal transcribed spacer 1 5.8S ribosomal RNA gene and internal transcribed spacer 2 complete sequence and large subunit ribosomal RNA gene partial sequence	0.0165072	0.0059524
KU879012.1 Aquilaria agallochum 18S ribosomal RNA gene partial sequence internal transcribed spacer 1 5.8S ribosomal RNA gene and internal transcribed spacer 2 complete sequence and 28S ribosomal RNA gene partial sequence_{aga}	KY817962.1 Aquilaria crassna voucher CS-11 small subunit ribosomal RNA gene partial sequence internal transcribed spacer 1 5.8S ribosomal RNA gene and internal transcribed spacer 2 complete sequence and large subunit ribosomal RNA gene partial sequence	0.0221253	0.00719082
MH134138.1 Aquilaria beccariana internal transcribed spacer 1 partial sequence 5.8S ribosomal RNA gene complete sequence and internal transcribed spacer 2 partial sequence_{aga}	KY817962.1 Aquilaria crassna voucher CS-11 small subunit ribosomal RNA gene partial sequence internal transcribed spacer 1 5.8S ribosomal RNA gene and internal transcribed spacer 2 complete sequence and large subunit ribosomal RNA gene partial sequence	0.0220708	0.00727399
KT779116.1 Aquilaria beccariana voucher FBL04001 internal transcribed spacer 1 partial sequence 5.8S ribosomal RNA gene complete sequence and internal transcribed spacer 2 partial sequence_{aga}	KY817962.1 Aquilaria crassna voucher CS-11 small subunit ribosomal RNA gene partial sequence internal transcribed spacer 1 5.8S ribosomal RNA gene and internal transcribed spacer 2 complete sequence and large subunit ribosomal RNA gene partial sequence	0.0421308	0.0101917
KT364477.1 Aquilaria beccariana voucher SFN29381 internal transcribed spacer 1 partial sequence 5.8S ribosomal RNA gene complete sequence and internal transcribed spacer 2 partial sequence_{aga}	KY817962.1 Aquilaria crassna voucher CS-11 small subunit ribosomal RNA gene partial sequence internal transcribed spacer 1 5.8S ribosomal RNA gene and internal transcribed spacer 2 complete sequence and large subunit ribosomal RNA gene partial sequence	0.0221534	0.00722737
KX351419.1 Aquilaria beccariana voucher S1 5.8S ribosomal RNA gene partial sequence internal transcribed spacer 2 complete sequence and large subunit ribosomal RNA gene partial sequence_{aga}	KY817962.1 Aquilaria crassna voucher CS-11 small subunit ribosomal RNA gene partial sequence internal transcribed spacer 1 5.8S ribosomal RNA gene and internal transcribed spacer 2 complete sequence and large subunit ribosomal RNA gene partial sequence	0	0
KX424704.1 Aquilaria beccariana 5.8S ribosomal RNA gene partial sequence internal transcribed spacer 2 complete sequence and 28S ribosomal RNA gene partial sequence_{aga}	KY817962.1 Aquilaria crassna voucher CS-11 small subunit ribosomal RNA gene partial sequence internal transcribed spacer 1 5.8S ribosomal RNA gene and internal transcribed spacer 2 complete sequence and large subunit ribosomal RNA gene partial sequence	0.0438711	0.011062
KU238038.1 Aquilaria crassna voucher FBL G11 WC3 internal transcribed spacer 2 partial sequence	KY817962.1 Aquilaria crassna voucher CS-11 small subunit ribosomal RNA gene partial sequence internal transcribed spacer 1 5.8S ribosomal RNA gene and internal transcribed spacer 2 complete sequence and large subunit ribosomal RNA gene partial sequence	0	0
MH134139.1 Aquilaria crassna internal transcribed spacer 1 partial sequence 5.8S ribosomal RNA gene complete sequence and internal transcribed spacer 2 partial sequence	KY817962.1 Aquilaria crassna voucher CS-11 small subunit ribosomal RNA gene partial sequence internal transcribed spacer 1 5.8S ribosomal RNA gene and internal transcribed spacer 2 complete sequence and large subunit ribosomal RNA gene partial sequence	0	0
KU244111.1 Aquilaria crassna voucher FBL01017 internal transcribed spacer 2 partial sequence	KY817962.1 Aquilaria crassna voucher CS-11 small subunit ribosomal RNA gene partial sequence internal transcribed spacer 1 5.8S ribosomal RNA gene and internal transcribed spacer 2 complete sequence and large subunit ribosomal RNA gene partial sequence	0	0
KU244110.1 Aquilaria crassna voucher FBL01014 internal transcribed spacer 2 partial sequence	KY817962.1 Aquilaria crassna voucher CS-11 small subunit ribosomal RNA gene partial sequence internal transcribed spacer 1 5.8S ribosomal RNA gene and internal transcribed spacer 2 complete sequence and large subunit ribosomal RNA gene partial sequence	0	0
KU244109.1 Aquilaria crassna voucher FBL01013 internal transcribed spacer 2 partial sequence	KY817962.1 Aquilaria crassna voucher CS-11 small subunit ribosomal RNA gene partial sequence internal transcribed spacer 1 5.8S ribosomal RNA gene and internal transcribed spacer 2 complete sequence and large subunit ribosomal RNA gene partial sequence	0	0
KU244108.1 Aquilaria crassna voucher FBL01012 internal transcribed spacer 2 partial sequence	KY817962.1 Aquilaria crassna voucher CS-11 small subunit ribosomal RNA gene partial sequence internal transcribed spacer 1 5.8S ribosomal RNA gene and internal transcribed spacer 2 complete sequence and large subunit ribosomal RNA gene partial sequence	0	0
KU238037.1 Aquilaria crassna voucher FBL G10 WC2 internal transcribed spacer 2 partial sequence	KY817962.1 Aquilaria crassna voucher CS-11 small subunit ribosomal RNA gene partial sequence internal transcribed spacer 1 5.8S ribosomal RNA gene and internal transcribed spacer 2 complete sequence and large subunit ribosomal RNA gene partial sequence	0.0027248	0.00273681
KU238035.1 Aquilaria crassna voucher FBL G04 WC1 internal transcribed spacer 2 partial sequence	KY817962.1 Aquilaria crassna voucher CS-11 small subunit ribosomal RNA gene partial sequence internal transcribed spacer 1 5.8S ribosomal RNA gene and internal transcribed spacer 2 complete sequence and large subunit ribosomal RNA gene partial sequence	0.0027248	0.00273681
KU244085.1 Aquilaria crassna voucher FBL01017 internal transcribed spacer 1 partial sequence 5.8S ribosomal RNA gene complete sequence and internal transcribed spacer 2 partial sequence	KY817962.1 Aquilaria crassna voucher CS-11 small subunit ribosomal RNA gene partial sequence internal transcribed spacer 1 5.8S ribosomal RNA gene and internal transcribed spacer 2 complete sequence and large subunit ribosomal RNA gene partial sequence	0	0
KU244084.1 Aquilaria crassna voucher FBL01014 internal transcribed spacer 1 partial sequence 5.8S ribosomal RNA gene complete sequence and internal transcribed spacer 2 partial sequence	KY817962.1 Aquilaria crassna voucher CS-11 small subunit ribosomal RNA gene partial sequence internal transcribed spacer 1 5.8S ribosomal RNA gene and internal transcribed spacer 2 complete sequence and large subunit ribosomal RNA gene partial sequence	0	0
KU244083.1 Aquilaria crassna voucher FBL01013 internal transcribed spacer 1 partial sequence 5.8S ribosomal RNA gene complete sequence and internal transcribed spacer 2 partial sequence_{cra}	KY817962.1 Aquilaria crassna voucher CS-11 small subunit ribosomal RNA gene partial sequence internal transcribed spacer 1 5.8S ribosomal RNA gene and internal transcribed spacer 2 complete sequence and large subunit ribosomal RNA gene partial sequence	0	0
KU244082.1 Aquilaria crassna voucher FBL01012 internal transcribed spacer 1 partial sequence 5.8S ribosomal RNA gene complete sequence and internal transcribed spacer 2 partial sequence	KY817962.1 Aquilaria crassna voucher CS-11 small subunit ribosomal RNA gene partial sequence internal transcribed spacer 1 5.8S ribosomal RNA gene and internal transcribed spacer 2 complete sequence and large subunit ribosomal RNA gene partial sequence	0	0
KT364478.1 Aquilaria crassna voucher FBL01012 internal transcribed spacer 1 partial sequence 5.8S ribosomal RNA gene complete sequence and internal transcribed spacer 2 partial sequence	KY817962.1 Aquilaria crassna voucher CS-11 small subunit ribosomal RNA gene partial sequence internal transcribed spacer 1 5.8S ribosomal RNA gene and internal transcribed spacer 2 complete sequence and large subunit ribosomal RNA gene partial sequence	0	0
KY817982.1 Aquilaria crassna voucher S-9 small subunit ribosomal RNA gene partial sequence internal transcribed spacer 1 5.8S ribosomal RNA gene and internal transcribed spacer 2 complete sequence and large subunit ribosomal RNA gene partial sequence	KY817962.1 Aquilaria crassna voucher CS-11 small subunit ribosomal RNA gene partial sequence internal transcribed spacer 1 5.8S ribosomal RNA gene and internal transcribed spacer 2 complete sequence and large subunit ribosomal RNA gene partial sequence	0	0
KY817979.1 Aquilaria crassna voucher S-1 small subunit ribosomal RNA gene partial sequence internal transcribed spacer 1 5.8S ribosomal RNA gene and internal transcribed spacer 2 complete sequence and large subunit ribosomal RNA gene partial sequence	KY817962.1 Aquilaria crassna voucher CS-11 small subunit ribosomal RNA gene partial sequence internal transcribed spacer 1 5.8S ribosomal RNA gene and internal transcribed spacer 2 complete sequence and large subunit ribosomal RNA gene partial sequence	0	0
KY817973.1 Aquilaria crassna voucher ML-9 small subunit ribosomal RNA gene partial sequence internal transcribed spacer 1 5.8S ribosomal RNA gene and internal transcribed spacer 2 complete sequence and large subunit ribosomal RNA gene partial sequence	KY817962.1 Aquilaria crassna voucher CS-11 small subunit ribosomal RNA gene partial sequence internal transcribed spacer 1 5.8S ribosomal RNA gene and internal transcribed spacer 2 complete sequence and large subunit ribosomal RNA gene partial sequence	0	0
KY817972.1 Aquilaria crassna voucher ML-8 small subunit ribosomal RNA gene partial sequence internal transcribed spacer 1 5.8S ribosomal RNA gene and internal transcribed spacer 2 complete sequence and large subunit ribosomal RNA gene partial sequence	KY817962.1 Aquilaria crassna voucher CS-11 small subunit ribosomal RNA gene partial sequence internal transcribed spacer 1 5.8S ribosomal RNA gene and internal transcribed spacer 2 complete sequence and large subunit ribosomal RNA gene partial sequence	0	0
KY817971.1 Aquilaria crassna voucher ML-7 small subunit ribosomal RNA gene partial sequence internal transcribed spacer 1 5.8S ribosomal RNA gene and internal transcribed spacer 2 complete sequence and large subunit ribosomal RNA gene partial sequence	KY817962.1 Aquilaria crassna voucher CS-11 small subunit ribosomal RNA gene partial sequence internal transcribed spacer 1 5.8S ribosomal RNA gene and internal transcribed spacer 2 complete sequence and large subunit ribosomal RNA gene partial sequence	0	0
KY817970.1 Aquilaria crassna voucher ML-6 small subunit ribosomal RNA gene partial sequence internal transcribed spacer 1 5.8S ribosomal RNA gene and internal transcribed spacer 2 complete sequence and large subunit ribosomal RNA gene partial sequence	KY817962.1 Aquilaria crassna voucher CS-11 small subunit ribosomal RNA gene partial sequence internal transcribed spacer 1 5.8S ribosomal RNA gene and internal transcribed spacer 2 complete sequence and large subunit ribosomal RNA gene partial sequence	0	0
KY817969.1 Aquilaria crassna voucher ML-5 small subunit ribosomal RNA gene partial sequence internal transcribed spacer 1 5.8S ribosomal RNA gene and internal transcribed spacer 2 complete sequence and large subunit ribosomal RNA gene partial sequence	KY817962.1 Aquilaria crassna voucher CS-11 small subunit ribosomal RNA gene partial sequence internal transcribed spacer 1 5.8S ribosomal RNA gene and internal transcribed spacer 2 complete sequence and large subunit ribosomal RNA gene partial sequence	0	0
KY817968.1 Aquilaria crassna voucher ML-4 small subunit ribosomal RNA gene partial sequence internal transcribed spacer 1 5.8S ribosomal RNA gene and internal transcribed spacer 2 complete sequence and large subunit ribosomal RNA gene partial sequence	KY817962.1 Aquilaria crassna voucher CS-11 small subunit ribosomal RNA gene partial sequence internal transcribed spacer 1 5.8S ribosomal RNA gene and internal transcribed spacer 2 complete sequence and large subunit ribosomal RNA gene partial sequence	0	0
KY817967.1 Aquilaria crassna voucher ML-3 small subunit ribosomal RNA gene partial sequence internal transcribed spacer 1 5.8S ribosomal RNA gene and internal transcribed spacer 2 complete sequence and large subunit ribosomal RNA gene partial sequence	KY817962.1 Aquilaria crassna voucher CS-11 small subunit ribosomal RNA gene partial sequence internal transcribed spacer 1 5.8S ribosomal RNA gene and internal transcribed spacer 2 complete sequence and large subunit ribosomal RNA gene partial sequence	0	0
KY817964.1 Aquilaria crassna voucher CS-13 small subunit ribosomal RNA gene partial sequence internal transcribed spacer 1 5.8S ribosomal RNA gene and internal transcribed spacer 2 complete sequence and large subunit ribosomal RNA gene partial sequence	KY817962.1 Aquilaria crassna voucher CS-11 small subunit ribosomal RNA gene partial sequence internal transcribed spacer 1 5.8S ribosomal RNA gene and internal transcribed spacer 2 complete sequence and large subunit ribosomal RNA gene partial sequence	0	0
KY817963.1 Aquilaria crassna voucher CS-12 small subunit ribosomal RNA gene partial sequence internal transcribed spacer 1 5.8S ribosomal RNA gene and internal transcribed spacer 2 complete sequence and large subunit ribosomal RNA gene partial sequence	KY817962.1 Aquilaria crassna voucher CS-11 small subunit ribosomal RNA gene partial sequence internal transcribed spacer 1 5.8S ribosomal RNA gene and internal transcribed spacer 2 complete sequence and large subunit ribosomal RNA gene partial sequence	0	0
MH134137.1 Aquilaria agallochum internal transcribed spacer 1 partial sequence 5.8S ribosomal RNA gene complete sequence and internal transcribed spacer 2 partial sequence_{aga}	KY817961.1 Aquilaria crassna voucher CS-10 small subunit ribosomal RNA gene partial sequence internal transcribed spacer 1 5.8S ribosomal RNA gene and internal transcribed spacer 2 complete sequence and large subunit ribosomal RNA gene partial sequence	0.0165072	0.0059524
KU879012.1 Aquilaria agallochum 18S ribosomal RNA gene partial sequence internal transcribed spacer 1 5.8S ribosomal RNA gene and internal transcribed spacer 2 complete sequence and 28S ribosomal RNA gene partial sequence_{aga}	KY817961.1 Aquilaria crassna voucher CS-10 small subunit ribosomal RNA gene partial sequence internal transcribed spacer 1 5.8S ribosomal RNA gene and internal transcribed spacer 2 complete sequence and large subunit ribosomal RNA gene partial sequence	0.0221253	0.00719082
MH134138.1 Aquilaria beccariana internal transcribed spacer 1 partial sequence 5.8S ribosomal RNA gene complete sequence and internal transcribed spacer 2 partial sequence_{aga}	KY817961.1 Aquilaria crassna voucher CS-10 small subunit ribosomal RNA gene partial sequence internal transcribed spacer 1 5.8S ribosomal RNA gene and internal transcribed spacer 2 complete sequence and large subunit ribosomal RNA gene partial sequence	0.0220708	0.00727399
KT779116.1 Aquilaria beccariana voucher FBL04001 internal transcribed spacer 1 partial sequence 5.8S ribosomal RNA gene complete sequence and internal transcribed spacer 2 partial sequence_{aga}	KY817961.1 Aquilaria crassna voucher CS-10 small subunit ribosomal RNA gene partial sequence internal transcribed spacer 1 5.8S ribosomal RNA gene and internal transcribed spacer 2 complete sequence and large subunit ribosomal RNA gene partial sequence	0.0421308	0.0101917
KT364477.1 Aquilaria beccariana voucher SFN29381 internal transcribed spacer 1 partial sequence 5.8S ribosomal RNA gene complete sequence and internal transcribed spacer 2 partial sequence_{aga}	KY817961.1 Aquilaria crassna voucher CS-10 small subunit ribosomal RNA gene partial sequence internal transcribed spacer 1 5.8S ribosomal RNA gene and internal transcribed spacer 2 complete sequence and large subunit ribosomal RNA gene partial sequence	0.0221534	0.00722737
KX351419.1 Aquilaria beccariana voucher S1 5.8S ribosomal RNA gene partial sequence internal transcribed spacer 2 complete sequence and large subunit ribosomal RNA gene partial sequence_{aga}	KY817961.1 Aquilaria crassna voucher CS-10 small subunit ribosomal RNA gene partial sequence internal transcribed spacer 1 5.8S ribosomal RNA gene and internal transcribed spacer 2 complete sequence and large subunit ribosomal RNA gene partial sequence	0	0
KX424704.1 Aquilaria beccariana 5.8S ribosomal RNA gene partial sequence internal transcribed spacer 2 complete sequence and 28S ribosomal RNA gene partial sequence_{aga}	KY817961.1 Aquilaria crassna voucher CS-10 small subunit ribosomal RNA gene partial sequence internal transcribed spacer 1 5.8S ribosomal RNA gene and internal transcribed spacer 2 complete sequence and large subunit ribosomal RNA gene partial sequence	0.0438711	0.011062
KU238038.1 Aquilaria crassna voucher FBL G11 WC3 internal transcribed spacer 2 partial sequence	KY817961.1 Aquilaria crassna voucher CS-10 small subunit ribosomal RNA gene partial sequence internal transcribed spacer 1 5.8S ribosomal RNA gene and internal transcribed spacer 2 complete sequence and large subunit ribosomal RNA gene partial sequence	0	0
MH134139.1 Aquilaria crassna internal transcribed spacer 1 partial sequence 5.8S ribosomal RNA gene complete sequence and internal transcribed spacer 2 partial sequence	KY817961.1 Aquilaria crassna voucher CS-10 small subunit ribosomal RNA gene partial sequence internal transcribed spacer 1 5.8S ribosomal RNA gene and internal transcribed spacer 2 complete sequence and large subunit ribosomal RNA gene partial sequence	0	0
KU244111.1 Aquilaria crassna voucher FBL01017 internal transcribed spacer 2 partial sequence	KY817961.1 Aquilaria crassna voucher CS-10 small subunit ribosomal RNA gene partial sequence internal transcribed spacer 1 5.8S ribosomal RNA gene and internal transcribed spacer 2 complete sequence and large subunit ribosomal RNA gene partial sequence	0	0
KU244110.1 Aquilaria crassna voucher FBL01014 internal transcribed spacer 2 partial sequence	KY817961.1 Aquilaria crassna voucher CS-10 small subunit ribosomal RNA gene partial sequence internal transcribed spacer 1 5.8S ribosomal RNA gene and internal transcribed spacer 2 complete sequence and large subunit ribosomal RNA gene partial sequence	0	0
KU244109.1 Aquilaria crassna voucher FBL01013 internal transcribed spacer 2 partial sequence	KY817961.1 Aquilaria crassna voucher CS-10 small subunit ribosomal RNA gene partial sequence internal transcribed spacer 1 5.8S ribosomal RNA gene and internal transcribed spacer 2 complete sequence and large subunit ribosomal RNA gene partial sequence	0	0
KU244108.1 Aquilaria crassna voucher FBL01012 internal transcribed spacer 2 partial sequence	KY817961.1 Aquilaria crassna voucher CS-10 small subunit ribosomal RNA gene partial sequence internal transcribed spacer 1 5.8S ribosomal RNA gene and internal transcribed spacer 2 complete sequence and large subunit ribosomal RNA gene partial sequence	0	0
KU238037.1 Aquilaria crassna voucher FBL G10 WC2 internal transcribed spacer 2 partial sequence	KY817961.1 Aquilaria crassna voucher CS-10 small subunit ribosomal RNA gene partial sequence internal transcribed spacer 1 5.8S ribosomal RNA gene and internal transcribed spacer 2 complete sequence and large subunit ribosomal RNA gene partial sequence	0.0027248	0.00273681
KU238035.1 Aquilaria crassna voucher FBL G04 WC1 internal transcribed spacer 2 partial sequence	KY817961.1 Aquilaria crassna voucher CS-10 small subunit ribosomal RNA gene partial sequence internal transcribed spacer 1 5.8S ribosomal RNA gene and internal transcribed spacer 2 complete sequence and large subunit ribosomal RNA gene partial sequence	0.0027248	0.00273681
KU244085.1 Aquilaria crassna voucher FBL01017 internal transcribed spacer 1 partial sequence 5.8S ribosomal RNA gene complete sequence and internal transcribed spacer 2 partial sequence	KY817961.1 Aquilaria crassna voucher CS-10 small subunit ribosomal RNA gene partial sequence internal transcribed spacer 1 5.8S ribosomal RNA gene and internal transcribed spacer 2 complete sequence and large subunit ribosomal RNA gene partial sequence	0	0
KU244084.1 Aquilaria crassna voucher FBL01014 internal transcribed spacer 1 partial sequence 5.8S ribosomal RNA gene complete sequence and internal transcribed spacer 2 partial sequence	KY817961.1 Aquilaria crassna voucher CS-10 small subunit ribosomal RNA gene partial sequence internal transcribed spacer 1 5.8S ribosomal RNA gene and internal transcribed spacer 2 complete sequence and large subunit ribosomal RNA gene partial sequence	0	0
KU244083.1 Aquilaria crassna voucher FBL01013 internal transcribed spacer 1 partial sequence 5.8S ribosomal RNA gene complete sequence and internal transcribed spacer 2 partial sequence_{cra}	KY817961.1 Aquilaria crassna voucher CS-10 small subunit ribosomal RNA gene partial sequence internal transcribed spacer 1 5.8S ribosomal RNA gene and internal transcribed spacer 2 complete sequence and large subunit ribosomal RNA gene partial sequence	0	0
KU244082.1 Aquilaria crassna voucher FBL01012 internal transcribed spacer 1 partial sequence 5.8S ribosomal RNA gene complete sequence and internal transcribed spacer 2 partial sequence	KY817961.1 Aquilaria crassna voucher CS-10 small subunit ribosomal RNA gene partial sequence internal transcribed spacer 1 5.8S ribosomal RNA gene and internal transcribed spacer 2 complete sequence and large subunit ribosomal RNA gene partial sequence	0	0
KT364478.1 Aquilaria crassna voucher FBL01012 internal transcribed spacer 1 partial sequence 5.8S ribosomal RNA gene complete sequence and internal transcribed spacer 2 partial sequence	KY817961.1 Aquilaria crassna voucher CS-10 small subunit ribosomal RNA gene partial sequence internal transcribed spacer 1 5.8S ribosomal RNA gene and internal transcribed spacer 2 complete sequence and large subunit ribosomal RNA gene partial sequence	0	0
KY817982.1 Aquilaria crassna voucher S-9 small subunit ribosomal RNA gene partial sequence internal transcribed spacer 1 5.8S ribosomal RNA gene and internal transcribed spacer 2 complete sequence and large subunit ribosomal RNA gene partial sequence	KY817961.1 Aquilaria crassna voucher CS-10 small subunit ribosomal RNA gene partial sequence internal transcribed spacer 1 5.8S ribosomal RNA gene and internal transcribed spacer 2 complete sequence and large subunit ribosomal RNA gene partial sequence	0	0
KY817979.1 Aquilaria crassna voucher S-1 small subunit ribosomal RNA gene partial sequence internal transcribed spacer 1 5.8S ribosomal RNA gene and internal transcribed spacer 2 complete sequence and large subunit ribosomal RNA gene partial sequence	KY817961.1 Aquilaria crassna voucher CS-10 small subunit ribosomal RNA gene partial sequence internal transcribed spacer 1 5.8S ribosomal RNA gene and internal transcribed spacer 2 complete sequence and large subunit ribosomal RNA gene partial sequence	0	0
KY817973.1 Aquilaria crassna voucher ML-9 small subunit ribosomal RNA gene partial sequence internal transcribed spacer 1 5.8S ribosomal RNA gene and internal transcribed spacer 2 complete sequence and large subunit ribosomal RNA gene partial sequence	KY817961.1 Aquilaria crassna voucher CS-10 small subunit ribosomal RNA gene partial sequence internal transcribed spacer 1 5.8S ribosomal RNA gene and internal transcribed spacer 2 complete sequence and large subunit ribosomal RNA gene partial sequence	0	0
KY817972.1 Aquilaria crassna voucher ML-8 small subunit ribosomal RNA gene partial sequence internal transcribed spacer 1 5.8S ribosomal RNA gene and internal transcribed spacer 2 complete sequence and large subunit ribosomal RNA gene partial sequence	KY817961.1 Aquilaria crassna voucher CS-10 small subunit ribosomal RNA gene partial sequence internal transcribed spacer 1 5.8S ribosomal RNA gene and internal transcribed spacer 2 complete sequence and large subunit ribosomal RNA gene partial sequence	0	0
KY817971.1 Aquilaria crassna voucher ML-7 small subunit ribosomal RNA gene partial sequence internal transcribed spacer 1 5.8S ribosomal RNA gene and internal transcribed spacer 2 complete sequence and large subunit ribosomal RNA gene partial sequence	KY817961.1 Aquilaria crassna voucher CS-10 small subunit ribosomal RNA gene partial sequence internal transcribed spacer 1 5.8S ribosomal RNA gene and internal transcribed spacer 2 complete sequence and large subunit ribosomal RNA gene partial sequence	0	0
KY817970.1 Aquilaria crassna voucher ML-6 small subunit ribosomal RNA gene partial sequence internal transcribed spacer 1 5.8S ribosomal RNA gene and internal transcribed spacer 2 complete sequence and large subunit ribosomal RNA gene partial sequence	KY817961.1 Aquilaria crassna voucher CS-10 small subunit ribosomal RNA gene partial sequence internal transcribed spacer 1 5.8S ribosomal RNA gene and internal transcribed spacer 2 complete sequence and large subunit ribosomal RNA gene partial sequence	0	0
KY817969.1 Aquilaria crassna voucher ML-5 small subunit ribosomal RNA gene partial sequence internal transcribed spacer 1 5.8S ribosomal RNA gene and internal transcribed spacer 2 complete sequence and large subunit ribosomal RNA gene partial sequence	KY817961.1 Aquilaria crassna voucher CS-10 small subunit ribosomal RNA gene partial sequence internal transcribed spacer 1 5.8S ribosomal RNA gene and internal transcribed spacer 2 complete sequence and large subunit ribosomal RNA gene partial sequence	0	0
KY817968.1 Aquilaria crassna voucher ML-4 small subunit ribosomal RNA gene partial sequence internal transcribed spacer 1 5.8S ribosomal RNA gene and internal transcribed spacer 2 complete sequence and large subunit ribosomal RNA gene partial sequence	KY817961.1 Aquilaria crassna voucher CS-10 small subunit ribosomal RNA gene partial sequence internal transcribed spacer 1 5.8S ribosomal RNA gene and internal transcribed spacer 2 complete sequence and large subunit ribosomal RNA gene partial sequence	0	0
KY817967.1 Aquilaria crassna voucher ML-3 small subunit ribosomal RNA gene partial sequence internal transcribed spacer 1 5.8S ribosomal RNA gene and internal transcribed spacer 2 complete sequence and large subunit ribosomal RNA gene partial sequence	KY817961.1 Aquilaria crassna voucher CS-10 small subunit ribosomal RNA gene partial sequence internal transcribed spacer 1 5.8S ribosomal RNA gene and internal transcribed spacer 2 complete sequence and large subunit ribosomal RNA gene partial sequence	0	0
KY817964.1 Aquilaria crassna voucher CS-13 small subunit ribosomal RNA gene partial sequence internal transcribed spacer 1 5.8S ribosomal RNA gene and internal transcribed spacer 2 complete sequence and large subunit ribosomal RNA gene partial sequence	KY817961.1 Aquilaria crassna voucher CS-10 small subunit ribosomal RNA gene partial sequence internal transcribed spacer 1 5.8S ribosomal RNA gene and internal transcribed spacer 2 complete sequence and large subunit ribosomal RNA gene partial sequence	0	0
KY817963.1 Aquilaria crassna voucher CS-12 small subunit ribosomal RNA gene partial sequence internal transcribed spacer 1 5.8S ribosomal RNA gene and internal transcribed spacer 2 complete sequence and large subunit ribosomal RNA gene partial sequence	KY817961.1 Aquilaria crassna voucher CS-10 small subunit ribosomal RNA gene partial sequence internal transcribed spacer 1 5.8S ribosomal RNA gene and internal transcribed spacer 2 complete sequence and large subunit ribosomal RNA gene partial sequence	0	0
KY817962.1 Aquilaria crassna voucher CS-11 small subunit ribosomal RNA gene partial sequence internal transcribed spacer 1 5.8S ribosomal RNA gene and internal transcribed spacer 2 complete sequence and large subunit ribosomal RNA gene partial sequence	KY817961.1 Aquilaria crassna voucher CS-10 small subunit ribosomal RNA gene partial sequence internal transcribed spacer 1 5.8S ribosomal RNA gene and internal transcribed spacer 2 complete sequence and large subunit ribosomal RNA gene partial sequence	0	0
MH134137.1 Aquilaria agallochum internal transcribed spacer 1 partial sequence 5.8S ribosomal RNA gene complete sequence and internal transcribed spacer 2 partial sequence_{aga}	KY817959.1 Aquilaria crassna voucher CS-8 small subunit ribosomal RNA gene partial sequence internal transcribed spacer 1 5.8S ribosomal RNA gene and internal transcribed spacer 2 complete sequence and large subunit ribosomal RNA gene partial sequence	0.0165072	0.0059524
KU879012.1 Aquilaria agallochum 18S ribosomal RNA gene partial sequence internal transcribed spacer 1 5.8S ribosomal RNA gene and internal transcribed spacer 2 complete sequence and 28S ribosomal RNA gene partial sequence_{aga}	KY817959.1 Aquilaria crassna voucher CS-8 small subunit ribosomal RNA gene partial sequence internal transcribed spacer 1 5.8S ribosomal RNA gene and internal transcribed spacer 2 complete sequence and large subunit ribosomal RNA gene partial sequence	0.0221253	0.00719082
MH134138.1 Aquilaria beccariana internal transcribed spacer 1 partial sequence 5.8S ribosomal RNA gene complete sequence and internal transcribed spacer 2 partial sequence_{aga}	KY817959.1 Aquilaria crassna voucher CS-8 small subunit ribosomal RNA gene partial sequence internal transcribed spacer 1 5.8S ribosomal RNA gene and internal transcribed spacer 2 complete sequence and large subunit ribosomal RNA gene partial sequence	0.0220708	0.00727399
KT779116.1 Aquilaria beccariana voucher FBL04001 internal transcribed spacer 1 partial sequence 5.8S ribosomal RNA gene complete sequence and internal transcribed spacer 2 partial sequence_{aga}	KY817959.1 Aquilaria crassna voucher CS-8 small subunit ribosomal RNA gene partial sequence internal transcribed spacer 1 5.8S ribosomal RNA gene and internal transcribed spacer 2 complete sequence and large subunit ribosomal RNA gene partial sequence	0.0421308	0.0101917
KT364477.1 Aquilaria beccariana voucher SFN29381 internal transcribed spacer 1 partial sequence 5.8S ribosomal RNA gene complete sequence and internal transcribed spacer 2 partial sequence_{aga}	KY817959.1 Aquilaria crassna voucher CS-8 small subunit ribosomal RNA gene partial sequence internal transcribed spacer 1 5.8S ribosomal RNA gene and internal transcribed spacer 2 complete sequence and large subunit ribosomal RNA gene partial sequence	0.0221534	0.00722737
KX351419.1 Aquilaria beccariana voucher S1 5.8S ribosomal RNA gene partial sequence internal transcribed spacer 2 complete sequence and large subunit ribosomal RNA gene partial sequence_{aga}	KY817959.1 Aquilaria crassna voucher CS-8 small subunit ribosomal RNA gene partial sequence internal transcribed spacer 1 5.8S ribosomal RNA gene and internal transcribed spacer 2 complete sequence and large subunit ribosomal RNA gene partial sequence	0	0
KX424704.1 Aquilaria beccariana 5.8S ribosomal RNA gene partial sequence internal transcribed spacer 2 complete sequence and 28S ribosomal RNA gene partial sequence_{aga}	KY817959.1 Aquilaria crassna voucher CS-8 small subunit ribosomal RNA gene partial sequence internal transcribed spacer 1 5.8S ribosomal RNA gene and internal transcribed spacer 2 complete sequence and large subunit ribosomal RNA gene partial sequence	0.0438711	0.011062
KU238038.1 Aquilaria crassna voucher FBL G11 WC3 internal transcribed spacer 2 partial sequence	KY817959.1 Aquilaria crassna voucher CS-8 small subunit ribosomal RNA gene partial sequence internal transcribed spacer 1 5.8S ribosomal RNA gene and internal transcribed spacer 2 complete sequence and large subunit ribosomal RNA gene partial sequence	0	0
MH134139.1 Aquilaria crassna internal transcribed spacer 1 partial sequence 5.8S ribosomal RNA gene complete sequence and internal transcribed spacer 2 partial sequence	KY817959.1 Aquilaria crassna voucher CS-8 small subunit ribosomal RNA gene partial sequence internal transcribed spacer 1 5.8S ribosomal RNA gene and internal transcribed spacer 2 complete sequence and large subunit ribosomal RNA gene partial sequence	0	0
KU244111.1 Aquilaria crassna voucher FBL01017 internal transcribed spacer 2 partial sequence	KY817959.1 Aquilaria crassna voucher CS-8 small subunit ribosomal RNA gene partial sequence internal transcribed spacer 1 5.8S ribosomal RNA gene and internal transcribed spacer 2 complete sequence and large subunit ribosomal RNA gene partial sequence	0	0
KU244110.1 Aquilaria crassna voucher FBL01014 internal transcribed spacer 2 partial sequence	KY817959.1 Aquilaria crassna voucher CS-8 small subunit ribosomal RNA gene partial sequence internal transcribed spacer 1 5.8S ribosomal RNA gene and internal transcribed spacer 2 complete sequence and large subunit ribosomal RNA gene partial sequence	0	0
KU244109.1 Aquilaria crassna voucher FBL01013 internal transcribed spacer 2 partial sequence	KY817959.1 Aquilaria crassna voucher CS-8 small subunit ribosomal RNA gene partial sequence internal transcribed spacer 1 5.8S ribosomal RNA gene and internal transcribed spacer 2 complete sequence and large subunit ribosomal RNA gene partial sequence	0	0
KU244108.1 Aquilaria crassna voucher FBL01012 internal transcribed spacer 2 partial sequence	KY817959.1 Aquilaria crassna voucher CS-8 small subunit ribosomal RNA gene partial sequence internal transcribed spacer 1 5.8S ribosomal RNA gene and internal transcribed spacer 2 complete sequence and large subunit ribosomal RNA gene partial sequence	0	0
KU238037.1 Aquilaria crassna voucher FBL G10 WC2 internal transcribed spacer 2 partial sequence	KY817959.1 Aquilaria crassna voucher CS-8 small subunit ribosomal RNA gene partial sequence internal transcribed spacer 1 5.8S ribosomal RNA gene and internal transcribed spacer 2 complete sequence and large subunit ribosomal RNA gene partial sequence	0.0027248	0.00273681
KU238035.1 Aquilaria crassna voucher FBL G04 WC1 internal transcribed spacer 2 partial sequence	KY817959.1 Aquilaria crassna voucher CS-8 small subunit ribosomal RNA gene partial sequence internal transcribed spacer 1 5.8S ribosomal RNA gene and internal transcribed spacer 2 complete sequence and large subunit ribosomal RNA gene partial sequence	0.0027248	0.00273681
KU244085.1 Aquilaria crassna voucher FBL01017 internal transcribed spacer 1 partial sequence 5.8S ribosomal RNA gene complete sequence and internal transcribed spacer 2 partial sequence	KY817959.1 Aquilaria crassna voucher CS-8 small subunit ribosomal RNA gene partial sequence internal transcribed spacer 1 5.8S ribosomal RNA gene and internal transcribed spacer 2 complete sequence and large subunit ribosomal RNA gene partial sequence	0	0
KU244084.1 Aquilaria crassna voucher FBL01014 internal transcribed spacer 1 partial sequence 5.8S ribosomal RNA gene complete sequence and internal transcribed spacer 2 partial sequence	KY817959.1 Aquilaria crassna voucher CS-8 small subunit ribosomal RNA gene partial sequence internal transcribed spacer 1 5.8S ribosomal RNA gene and internal transcribed spacer 2 complete sequence and large subunit ribosomal RNA gene partial sequence	0	0
KU244083.1 Aquilaria crassna voucher FBL01013 internal transcribed spacer 1 partial sequence 5.8S ribosomal RNA gene complete sequence and internal transcribed spacer 2 partial sequence_{cra}	KY817959.1 Aquilaria crassna voucher CS-8 small subunit ribosomal RNA gene partial sequence internal transcribed spacer 1 5.8S ribosomal RNA gene and internal transcribed spacer 2 complete sequence and large subunit ribosomal RNA gene partial sequence	0	0
KU244082.1 Aquilaria crassna voucher FBL01012 internal transcribed spacer 1 partial sequence 5.8S ribosomal RNA gene complete sequence and internal transcribed spacer 2 partial sequence	KY817959.1 Aquilaria crassna voucher CS-8 small subunit ribosomal RNA gene partial sequence internal transcribed spacer 1 5.8S ribosomal RNA gene and internal transcribed spacer 2 complete sequence and large subunit ribosomal RNA gene partial sequence	0	0
KT364478.1 Aquilaria crassna voucher FBL01012 internal transcribed spacer 1 partial sequence 5.8S ribosomal RNA gene complete sequence and internal transcribed spacer 2 partial sequence	KY817959.1 Aquilaria crassna voucher CS-8 small subunit ribosomal RNA gene partial sequence internal transcribed spacer 1 5.8S ribosomal RNA gene and internal transcribed spacer 2 complete sequence and large subunit ribosomal RNA gene partial sequence	0	0
KY817982.1 Aquilaria crassna voucher S-9 small subunit ribosomal RNA gene partial sequence internal transcribed spacer 1 5.8S ribosomal RNA gene and internal transcribed spacer 2 complete sequence and large subunit ribosomal RNA gene partial sequence	KY817959.1 Aquilaria crassna voucher CS-8 small subunit ribosomal RNA gene partial sequence internal transcribed spacer 1 5.8S ribosomal RNA gene and internal transcribed spacer 2 complete sequence and large subunit ribosomal RNA gene partial sequence	0	0
KY817979.1 Aquilaria crassna voucher S-1 small subunit ribosomal RNA gene partial sequence internal transcribed spacer 1 5.8S ribosomal RNA gene and internal transcribed spacer 2 complete sequence and large subunit ribosomal RNA gene partial sequence	KY817959.1 Aquilaria crassna voucher CS-8 small subunit ribosomal RNA gene partial sequence internal transcribed spacer 1 5.8S ribosomal RNA gene and internal transcribed spacer 2 complete sequence and large subunit ribosomal RNA gene partial sequence	0	0
KY817973.1 Aquilaria crassna voucher ML-9 small subunit ribosomal RNA gene partial sequence internal transcribed spacer 1 5.8S ribosomal RNA gene and internal transcribed spacer 2 complete sequence and large subunit ribosomal RNA gene partial sequence	KY817959.1 Aquilaria crassna voucher CS-8 small subunit ribosomal RNA gene partial sequence internal transcribed spacer 1 5.8S ribosomal RNA gene and internal transcribed spacer 2 complete sequence and large subunit ribosomal RNA gene partial sequence	0	0
KY817972.1 Aquilaria crassna voucher ML-8 small subunit ribosomal RNA gene partial sequence internal transcribed spacer 1 5.8S ribosomal RNA gene and internal transcribed spacer 2 complete sequence and large subunit ribosomal RNA gene partial sequence	KY817959.1 Aquilaria crassna voucher CS-8 small subunit ribosomal RNA gene partial sequence internal transcribed spacer 1 5.8S ribosomal RNA gene and internal transcribed spacer 2 complete sequence and large subunit ribosomal RNA gene partial sequence	0	0
KY817971.1 Aquilaria crassna voucher ML-7 small subunit ribosomal RNA gene partial sequence internal transcribed spacer 1 5.8S ribosomal RNA gene and internal transcribed spacer 2 complete sequence and large subunit ribosomal RNA gene partial sequence	KY817959.1 Aquilaria crassna voucher CS-8 small subunit ribosomal RNA gene partial sequence internal transcribed spacer 1 5.8S ribosomal RNA gene and internal transcribed spacer 2 complete sequence and large subunit ribosomal RNA gene partial sequence	0	0
KY817970.1 Aquilaria crassna voucher ML-6 small subunit ribosomal RNA gene partial sequence internal transcribed spacer 1 5.8S ribosomal RNA gene and internal transcribed spacer 2 complete sequence and large subunit ribosomal RNA gene partial sequence	KY817959.1 Aquilaria crassna voucher CS-8 small subunit ribosomal RNA gene partial sequence internal transcribed spacer 1 5.8S ribosomal RNA gene and internal transcribed spacer 2 complete sequence and large subunit ribosomal RNA gene partial sequence	0	0
KY817969.1 Aquilaria crassna voucher ML-5 small subunit ribosomal RNA gene partial sequence internal transcribed spacer 1 5.8S ribosomal RNA gene and internal transcribed spacer 2 complete sequence and large subunit ribosomal RNA gene partial sequence	KY817959.1 Aquilaria crassna voucher CS-8 small subunit ribosomal RNA gene partial sequence internal transcribed spacer 1 5.8S ribosomal RNA gene and internal transcribed spacer 2 complete sequence and large subunit ribosomal RNA gene partial sequence	0	0
KY817968.1 Aquilaria crassna voucher ML-4 small subunit ribosomal RNA gene partial sequence internal transcribed spacer 1 5.8S ribosomal RNA gene and internal transcribed spacer 2 complete sequence and large subunit ribosomal RNA gene partial sequence	KY817959.1 Aquilaria crassna voucher CS-8 small subunit ribosomal RNA gene partial sequence internal transcribed spacer 1 5.8S ribosomal RNA gene and internal transcribed spacer 2 complete sequence and large subunit ribosomal RNA gene partial sequence	0	0
KY817967.1 Aquilaria crassna voucher ML-3 small subunit ribosomal RNA gene partial sequence internal transcribed spacer 1 5.8S ribosomal RNA gene and internal transcribed spacer 2 complete sequence and large subunit ribosomal RNA gene partial sequence	KY817959.1 Aquilaria crassna voucher CS-8 small subunit ribosomal RNA gene partial sequence internal transcribed spacer 1 5.8S ribosomal RNA gene and internal transcribed spacer 2 complete sequence and large subunit ribosomal RNA gene partial sequence	0	0
KY817964.1 Aquilaria crassna voucher CS-13 small subunit ribosomal RNA gene partial sequence internal transcribed spacer 1 5.8S ribosomal RNA gene and internal transcribed spacer 2 complete sequence and large subunit ribosomal RNA gene partial sequence	KY817959.1 Aquilaria crassna voucher CS-8 small subunit ribosomal RNA gene partial sequence internal transcribed spacer 1 5.8S ribosomal RNA gene and internal transcribed spacer 2 complete sequence and large subunit ribosomal RNA gene partial sequence	0	0
KY817963.1 Aquilaria crassna voucher CS-12 small subunit ribosomal RNA gene partial sequence internal transcribed spacer 1 5.8S ribosomal RNA gene and internal transcribed spacer 2 complete sequence and large subunit ribosomal RNA gene partial sequence	KY817959.1 Aquilaria crassna voucher CS-8 small subunit ribosomal RNA gene partial sequence internal transcribed spacer 1 5.8S ribosomal RNA gene and internal transcribed spacer 2 complete sequence and large subunit ribosomal RNA gene partial sequence	0	0
KY817962.1 Aquilaria crassna voucher CS-11 small subunit ribosomal RNA gene partial sequence internal transcribed spacer 1 5.8S ribosomal RNA gene and internal transcribed spacer 2 complete sequence and large subunit ribosomal RNA gene partial sequence	KY817959.1 Aquilaria crassna voucher CS-8 small subunit ribosomal RNA gene partial sequence internal transcribed spacer 1 5.8S ribosomal RNA gene and internal transcribed spacer 2 complete sequence and large subunit ribosomal RNA gene partial sequence	0	0
KY817961.1 Aquilaria crassna voucher CS-10 small subunit ribosomal RNA gene partial sequence internal transcribed spacer 1 5.8S ribosomal RNA gene and internal transcribed spacer 2 complete sequence and large subunit ribosomal RNA gene partial sequence	KY817959.1 Aquilaria crassna voucher CS-8 small subunit ribosomal RNA gene partial sequence internal transcribed spacer 1 5.8S ribosomal RNA gene and internal transcribed spacer 2 complete sequence and large subunit ribosomal RNA gene partial sequence	0	0
MH134137.1 Aquilaria agallochum internal transcribed spacer 1 partial sequence 5.8S ribosomal RNA gene complete sequence and internal transcribed spacer 2 partial sequence_{aga}	KY817958.1 Aquilaria crassna voucher CS-7 small subunit ribosomal RNA gene partial sequence internal transcribed spacer 1 5.8S ribosomal RNA gene and internal transcribed spacer 2 complete sequence and large subunit ribosomal RNA gene partial sequence	0.0165072	0.0059524
KU879012.1 Aquilaria agallochum 18S ribosomal RNA gene partial sequence internal transcribed spacer 1 5.8S ribosomal RNA gene and internal transcribed spacer 2 complete sequence and 28S ribosomal RNA gene partial sequence_{aga}	KY817958.1 Aquilaria crassna voucher CS-7 small subunit ribosomal RNA gene partial sequence internal transcribed spacer 1 5.8S ribosomal RNA gene and internal transcribed spacer 2 complete sequence and large subunit ribosomal RNA gene partial sequence	0.0221253	0.00719082
MH134138.1 Aquilaria beccariana internal transcribed spacer 1 partial sequence 5.8S ribosomal RNA gene complete sequence and internal transcribed spacer 2 partial sequence_{aga}	KY817958.1 Aquilaria crassna voucher CS-7 small subunit ribosomal RNA gene partial sequence internal transcribed spacer 1 5.8S ribosomal RNA gene and internal transcribed spacer 2 complete sequence and large subunit ribosomal RNA gene partial sequence	0.0220708	0.00727399
KT779116.1 Aquilaria beccariana voucher FBL04001 internal transcribed spacer 1 partial sequence 5.8S ribosomal RNA gene complete sequence and internal transcribed spacer 2 partial sequence_{aga}	KY817958.1 Aquilaria crassna voucher CS-7 small subunit ribosomal RNA gene partial sequence internal transcribed spacer 1 5.8S ribosomal RNA gene and internal transcribed spacer 2 complete sequence and large subunit ribosomal RNA gene partial sequence	0.0421308	0.0101917
KT364477.1 Aquilaria beccariana voucher SFN29381 internal transcribed spacer 1 partial sequence 5.8S ribosomal RNA gene complete sequence and internal transcribed spacer 2 partial sequence_{aga}	KY817958.1 Aquilaria crassna voucher CS-7 small subunit ribosomal RNA gene partial sequence internal transcribed spacer 1 5.8S ribosomal RNA gene and internal transcribed spacer 2 complete sequence and large subunit ribosomal RNA gene partial sequence	0.0221534	0.00722737
KX351419.1 Aquilaria beccariana voucher S1 5.8S ribosomal RNA gene partial sequence internal transcribed spacer 2 complete sequence and large subunit ribosomal RNA gene partial sequence_{aga}	KY817958.1 Aquilaria crassna voucher CS-7 small subunit ribosomal RNA gene partial sequence internal transcribed spacer 1 5.8S ribosomal RNA gene and internal transcribed spacer 2 complete sequence and large subunit ribosomal RNA gene partial sequence	0	0
KX424704.1 Aquilaria beccariana 5.8S ribosomal RNA gene partial sequence internal transcribed spacer 2 complete sequence and 28S ribosomal RNA gene partial sequence_{aga}	KY817958.1 Aquilaria crassna voucher CS-7 small subunit ribosomal RNA gene partial sequence internal transcribed spacer 1 5.8S ribosomal RNA gene and internal transcribed spacer 2 complete sequence and large subunit ribosomal RNA gene partial sequence	0.0438711	0.011062
KU238038.1 Aquilaria crassna voucher FBL G11 WC3 internal transcribed spacer 2 partial sequence	KY817958.1 Aquilaria crassna voucher CS-7 small subunit ribosomal RNA gene partial sequence internal transcribed spacer 1 5.8S ribosomal RNA gene and internal transcribed spacer 2 complete sequence and large subunit ribosomal RNA gene partial sequence	0	0
MH134139.1 Aquilaria crassna internal transcribed spacer 1 partial sequence 5.8S ribosomal RNA gene complete sequence and internal transcribed spacer 2 partial sequence	KY817958.1 Aquilaria crassna voucher CS-7 small subunit ribosomal RNA gene partial sequence internal transcribed spacer 1 5.8S ribosomal RNA gene and internal transcribed spacer 2 complete sequence and large subunit ribosomal RNA gene partial sequence	0	0
KU244111.1 Aquilaria crassna voucher FBL01017 internal transcribed spacer 2 partial sequence	KY817958.1 Aquilaria crassna voucher CS-7 small subunit ribosomal RNA gene partial sequence internal transcribed spacer 1 5.8S ribosomal RNA gene and internal transcribed spacer 2 complete sequence and large subunit ribosomal RNA gene partial sequence	0	0
KU244110.1 Aquilaria crassna voucher FBL01014 internal transcribed spacer 2 partial sequence	KY817958.1 Aquilaria crassna voucher CS-7 small subunit ribosomal RNA gene partial sequence internal transcribed spacer 1 5.8S ribosomal RNA gene and internal transcribed spacer 2 complete sequence and large subunit ribosomal RNA gene partial sequence	0	0
KU244109.1 Aquilaria crassna voucher FBL01013 internal transcribed spacer 2 partial sequence	KY817958.1 Aquilaria crassna voucher CS-7 small subunit ribosomal RNA gene partial sequence internal transcribed spacer 1 5.8S ribosomal RNA gene and internal transcribed spacer 2 complete sequence and large subunit ribosomal RNA gene partial sequence	0	0
KU244108.1 Aquilaria crassna voucher FBL01012 internal transcribed spacer 2 partial sequence	KY817958.1 Aquilaria crassna voucher CS-7 small subunit ribosomal RNA gene partial sequence internal transcribed spacer 1 5.8S ribosomal RNA gene and internal transcribed spacer 2 complete sequence and large subunit ribosomal RNA gene partial sequence	0	0
KU238037.1 Aquilaria crassna voucher FBL G10 WC2 internal transcribed spacer 2 partial sequence	KY817958.1 Aquilaria crassna voucher CS-7 small subunit ribosomal RNA gene partial sequence internal transcribed spacer 1 5.8S ribosomal RNA gene and internal transcribed spacer 2 complete sequence and large subunit ribosomal RNA gene partial sequence	0.0027248	0.00273681
KU238035.1 Aquilaria crassna voucher FBL G04 WC1 internal transcribed spacer 2 partial sequence	KY817958.1 Aquilaria crassna voucher CS-7 small subunit ribosomal RNA gene partial sequence internal transcribed spacer 1 5.8S ribosomal RNA gene and internal transcribed spacer 2 complete sequence and large subunit ribosomal RNA gene partial sequence	0.0027248	0.00273681
KU244085.1 Aquilaria crassna voucher FBL01017 internal transcribed spacer 1 partial sequence 5.8S ribosomal RNA gene complete sequence and internal transcribed spacer 2 partial sequence	KY817958.1 Aquilaria crassna voucher CS-7 small subunit ribosomal RNA gene partial sequence internal transcribed spacer 1 5.8S ribosomal RNA gene and internal transcribed spacer 2 complete sequence and large subunit ribosomal RNA gene partial sequence	0	0
KU244084.1 Aquilaria crassna voucher FBL01014 internal transcribed spacer 1 partial sequence 5.8S ribosomal RNA gene complete sequence and internal transcribed spacer 2 partial sequence	KY817958.1 Aquilaria crassna voucher CS-7 small subunit ribosomal RNA gene partial sequence internal transcribed spacer 1 5.8S ribosomal RNA gene and internal transcribed spacer 2 complete sequence and large subunit ribosomal RNA gene partial sequence	0	0
KU244083.1 Aquilaria crassna voucher FBL01013 internal transcribed spacer 1 partial sequence 5.8S ribosomal RNA gene complete sequence and internal transcribed spacer 2 partial sequence_{cra}	KY817958.1 Aquilaria crassna voucher CS-7 small subunit ribosomal RNA gene partial sequence internal transcribed spacer 1 5.8S ribosomal RNA gene and internal transcribed spacer 2 complete sequence and large subunit ribosomal RNA gene partial sequence	0	0
KU244082.1 Aquilaria crassna voucher FBL01012 internal transcribed spacer 1 partial sequence 5.8S ribosomal RNA gene complete sequence and internal transcribed spacer 2 partial sequence	KY817958.1 Aquilaria crassna voucher CS-7 small subunit ribosomal RNA gene partial sequence internal transcribed spacer 1 5.8S ribosomal RNA gene and internal transcribed spacer 2 complete sequence and large subunit ribosomal RNA gene partial sequence	0	0
KT364478.1 Aquilaria crassna voucher FBL01012 internal transcribed spacer 1 partial sequence 5.8S ribosomal RNA gene complete sequence and internal transcribed spacer 2 partial sequence	KY817958.1 Aquilaria crassna voucher CS-7 small subunit ribosomal RNA gene partial sequence internal transcribed spacer 1 5.8S ribosomal RNA gene and internal transcribed spacer 2 complete sequence and large subunit ribosomal RNA gene partial sequence	0	0
KY817982.1 Aquilaria crassna voucher S-9 small subunit ribosomal RNA gene partial sequence internal transcribed spacer 1 5.8S ribosomal RNA gene and internal transcribed spacer 2 complete sequence and large subunit ribosomal RNA gene partial sequence	KY817958.1 Aquilaria crassna voucher CS-7 small subunit ribosomal RNA gene partial sequence internal transcribed spacer 1 5.8S ribosomal RNA gene and internal transcribed spacer 2 complete sequence and large subunit ribosomal RNA gene partial sequence	0	0
KY817979.1 Aquilaria crassna voucher S-1 small subunit ribosomal RNA gene partial sequence internal transcribed spacer 1 5.8S ribosomal RNA gene and internal transcribed spacer 2 complete sequence and large subunit ribosomal RNA gene partial sequence	KY817958.1 Aquilaria crassna voucher CS-7 small subunit ribosomal RNA gene partial sequence internal transcribed spacer 1 5.8S ribosomal RNA gene and internal transcribed spacer 2 complete sequence and large subunit ribosomal RNA gene partial sequence	0	0
KY817973.1 Aquilaria crassna voucher ML-9 small subunit ribosomal RNA gene partial sequence internal transcribed spacer 1 5.8S ribosomal RNA gene and internal transcribed spacer 2 complete sequence and large subunit ribosomal RNA gene partial sequence	KY817958.1 Aquilaria crassna voucher CS-7 small subunit ribosomal RNA gene partial sequence internal transcribed spacer 1 5.8S ribosomal RNA gene and internal transcribed spacer 2 complete sequence and large subunit ribosomal RNA gene partial sequence	0	0
KY817972.1 Aquilaria crassna voucher ML-8 small subunit ribosomal RNA gene partial sequence internal transcribed spacer 1 5.8S ribosomal RNA gene and internal transcribed spacer 2 complete sequence and large subunit ribosomal RNA gene partial sequence	KY817958.1 Aquilaria crassna voucher CS-7 small subunit ribosomal RNA gene partial sequence internal transcribed spacer 1 5.8S ribosomal RNA gene and internal transcribed spacer 2 complete sequence and large subunit ribosomal RNA gene partial sequence	0	0
KY817971.1 Aquilaria crassna voucher ML-7 small subunit ribosomal RNA gene partial sequence internal transcribed spacer 1 5.8S ribosomal RNA gene and internal transcribed spacer 2 complete sequence and large subunit ribosomal RNA gene partial sequence	KY817958.1 Aquilaria crassna voucher CS-7 small subunit ribosomal RNA gene partial sequence internal transcribed spacer 1 5.8S ribosomal RNA gene and internal transcribed spacer 2 complete sequence and large subunit ribosomal RNA gene partial sequence	0	0
KY817970.1 Aquilaria crassna voucher ML-6 small subunit ribosomal RNA gene partial sequence internal transcribed spacer 1 5.8S ribosomal RNA gene and internal transcribed spacer 2 complete sequence and large subunit ribosomal RNA gene partial sequence	KY817958.1 Aquilaria crassna voucher CS-7 small subunit ribosomal RNA gene partial sequence internal transcribed spacer 1 5.8S ribosomal RNA gene and internal transcribed spacer 2 complete sequence and large subunit ribosomal RNA gene partial sequence	0	0
KY817969.1 Aquilaria crassna voucher ML-5 small subunit ribosomal RNA gene partial sequence internal transcribed spacer 1 5.8S ribosomal RNA gene and internal transcribed spacer 2 complete sequence and large subunit ribosomal RNA gene partial sequence	KY817958.1 Aquilaria crassna voucher CS-7 small subunit ribosomal RNA gene partial sequence internal transcribed spacer 1 5.8S ribosomal RNA gene and internal transcribed spacer 2 complete sequence and large subunit ribosomal RNA gene partial sequence	0	0
KY817968.1 Aquilaria crassna voucher ML-4 small subunit ribosomal RNA gene partial sequence internal transcribed spacer 1 5.8S ribosomal RNA gene and internal transcribed spacer 2 complete sequence and large subunit ribosomal RNA gene partial sequence	KY817958.1 Aquilaria crassna voucher CS-7 small subunit ribosomal RNA gene partial sequence internal transcribed spacer 1 5.8S ribosomal RNA gene and internal transcribed spacer 2 complete sequence and large subunit ribosomal RNA gene partial sequence	0	0
KY817967.1 Aquilaria crassna voucher ML-3 small subunit ribosomal RNA gene partial sequence internal transcribed spacer 1 5.8S ribosomal RNA gene and internal transcribed spacer 2 complete sequence and large subunit ribosomal RNA gene partial sequence	KY817958.1 Aquilaria crassna voucher CS-7 small subunit ribosomal RNA gene partial sequence internal transcribed spacer 1 5.8S ribosomal RNA gene and internal transcribed spacer 2 complete sequence and large subunit ribosomal RNA gene partial sequence	0	0
KY817964.1 Aquilaria crassna voucher CS-13 small subunit ribosomal RNA gene partial sequence internal transcribed spacer 1 5.8S ribosomal RNA gene and internal transcribed spacer 2 complete sequence and large subunit ribosomal RNA gene partial sequence	KY817958.1 Aquilaria crassna voucher CS-7 small subunit ribosomal RNA gene partial sequence internal transcribed spacer 1 5.8S ribosomal RNA gene and internal transcribed spacer 2 complete sequence and large subunit ribosomal RNA gene partial sequence	0	0
KY817963.1 Aquilaria crassna voucher CS-12 small subunit ribosomal RNA gene partial sequence internal transcribed spacer 1 5.8S ribosomal RNA gene and internal transcribed spacer 2 complete sequence and large subunit ribosomal RNA gene partial sequence	KY817958.1 Aquilaria crassna voucher CS-7 small subunit ribosomal RNA gene partial sequence internal transcribed spacer 1 5.8S ribosomal RNA gene and internal transcribed spacer 2 complete sequence and large subunit ribosomal RNA gene partial sequence	0	0
KY817962.1 Aquilaria crassna voucher CS-11 small subunit ribosomal RNA gene partial sequence internal transcribed spacer 1 5.8S ribosomal RNA gene and internal transcribed spacer 2 complete sequence and large subunit ribosomal RNA gene partial sequence	KY817958.1 Aquilaria crassna voucher CS-7 small subunit ribosomal RNA gene partial sequence internal transcribed spacer 1 5.8S ribosomal RNA gene and internal transcribed spacer 2 complete sequence and large subunit ribosomal RNA gene partial sequence	0	0
KY817961.1 Aquilaria crassna voucher CS-10 small subunit ribosomal RNA gene partial sequence internal transcribed spacer 1 5.8S ribosomal RNA gene and internal transcribed spacer 2 complete sequence and large subunit ribosomal RNA gene partial sequence	KY817958.1 Aquilaria crassna voucher CS-7 small subunit ribosomal RNA gene partial sequence internal transcribed spacer 1 5.8S ribosomal RNA gene and internal transcribed spacer 2 complete sequence and large subunit ribosomal RNA gene partial sequence	0	0
KY817959.1 Aquilaria crassna voucher CS-8 small subunit ribosomal RNA gene partial sequence internal transcribed spacer 1 5.8S ribosomal RNA gene and internal transcribed spacer 2 complete sequence and large subunit ribosomal RNA gene partial sequence	KY817958.1 Aquilaria crassna voucher CS-7 small subunit ribosomal RNA gene partial sequence internal transcribed spacer 1 5.8S ribosomal RNA gene and internal transcribed spacer 2 complete sequence and large subunit ribosomal RNA gene partial sequence	0	0
MH134137.1 Aquilaria agallochum internal transcribed spacer 1 partial sequence 5.8S ribosomal RNA gene complete sequence and internal transcribed spacer 2 partial sequence_{aga}	KY817957.1 Aquilaria crassna voucher CS-6 small subunit ribosomal RNA gene partial sequence internal transcribed spacer 1 5.8S ribosomal RNA gene and internal transcribed spacer 2 complete sequence and large subunit ribosomal RNA gene partial sequence	0.0165072	0.0059524
KU879012.1 Aquilaria agallochum 18S ribosomal RNA gene partial sequence internal transcribed spacer 1 5.8S ribosomal RNA gene and internal transcribed spacer 2 complete sequence and 28S ribosomal RNA gene partial sequence_{aga}	KY817957.1 Aquilaria crassna voucher CS-6 small subunit ribosomal RNA gene partial sequence internal transcribed spacer 1 5.8S ribosomal RNA gene and internal transcribed spacer 2 complete sequence and large subunit ribosomal RNA gene partial sequence	0.0221253	0.00719082
MH134138.1 Aquilaria beccariana internal transcribed spacer 1 partial sequence 5.8S ribosomal RNA gene complete sequence and internal transcribed spacer 2 partial sequence_{aga}	KY817957.1 Aquilaria crassna voucher CS-6 small subunit ribosomal RNA gene partial sequence internal transcribed spacer 1 5.8S ribosomal RNA gene and internal transcribed spacer 2 complete sequence and large subunit ribosomal RNA gene partial sequence	0.0220708	0.00727399
KT779116.1 Aquilaria beccariana voucher FBL04001 internal transcribed spacer 1 partial sequence 5.8S ribosomal RNA gene complete sequence and internal transcribed spacer 2 partial sequence_{aga}	KY817957.1 Aquilaria crassna voucher CS-6 small subunit ribosomal RNA gene partial sequence internal transcribed spacer 1 5.8S ribosomal RNA gene and internal transcribed spacer 2 complete sequence and large subunit ribosomal RNA gene partial sequence	0.0421308	0.0101917
KT364477.1 Aquilaria beccariana voucher SFN29381 internal transcribed spacer 1 partial sequence 5.8S ribosomal RNA gene complete sequence and internal transcribed spacer 2 partial sequence_{aga}	KY817957.1 Aquilaria crassna voucher CS-6 small subunit ribosomal RNA gene partial sequence internal transcribed spacer 1 5.8S ribosomal RNA gene and internal transcribed spacer 2 complete sequence and large subunit ribosomal RNA gene partial sequence	0.0221534	0.00722737
KX351419.1 Aquilaria beccariana voucher S1 5.8S ribosomal RNA gene partial sequence internal transcribed spacer 2 complete sequence and large subunit ribosomal RNA gene partial sequence_{aga}	KY817957.1 Aquilaria crassna voucher CS-6 small subunit ribosomal RNA gene partial sequence internal transcribed spacer 1 5.8S ribosomal RNA gene and internal transcribed spacer 2 complete sequence and large subunit ribosomal RNA gene partial sequence	0	0
KX424704.1 Aquilaria beccariana 5.8S ribosomal RNA gene partial sequence internal transcribed spacer 2 complete sequence and 28S ribosomal RNA gene partial sequence_{aga}	KY817957.1 Aquilaria crassna voucher CS-6 small subunit ribosomal RNA gene partial sequence internal transcribed spacer 1 5.8S ribosomal RNA gene and internal transcribed spacer 2 complete sequence and large subunit ribosomal RNA gene partial sequence	0.0438711	0.011062
KU238038.1 Aquilaria crassna voucher FBL G11 WC3 internal transcribed spacer 2 partial sequence	KY817957.1 Aquilaria crassna voucher CS-6 small subunit ribosomal RNA gene partial sequence internal transcribed spacer 1 5.8S ribosomal RNA gene and internal transcribed spacer 2 complete sequence and large subunit ribosomal RNA gene partial sequence	0	0
MH134139.1 Aquilaria crassna internal transcribed spacer 1 partial sequence 5.8S ribosomal RNA gene complete sequence and internal transcribed spacer 2 partial sequence	KY817957.1 Aquilaria crassna voucher CS-6 small subunit ribosomal RNA gene partial sequence internal transcribed spacer 1 5.8S ribosomal RNA gene and internal transcribed spacer 2 complete sequence and large subunit ribosomal RNA gene partial sequence	0	0
KU244111.1 Aquilaria crassna voucher FBL01017 internal transcribed spacer 2 partial sequence	KY817957.1 Aquilaria crassna voucher CS-6 small subunit ribosomal RNA gene partial sequence internal transcribed spacer 1 5.8S ribosomal RNA gene and internal transcribed spacer 2 complete sequence and large subunit ribosomal RNA gene partial sequence	0	0
KU244110.1 Aquilaria crassna voucher FBL01014 internal transcribed spacer 2 partial sequence	KY817957.1 Aquilaria crassna voucher CS-6 small subunit ribosomal RNA gene partial sequence internal transcribed spacer 1 5.8S ribosomal RNA gene and internal transcribed spacer 2 complete sequence and large subunit ribosomal RNA gene partial sequence	0	0
KU244109.1 Aquilaria crassna voucher FBL01013 internal transcribed spacer 2 partial sequence	KY817957.1 Aquilaria crassna voucher CS-6 small subunit ribosomal RNA gene partial sequence internal transcribed spacer 1 5.8S ribosomal RNA gene and internal transcribed spacer 2 complete sequence and large subunit ribosomal RNA gene partial sequence	0	0
KU244108.1 Aquilaria crassna voucher FBL01012 internal transcribed spacer 2 partial sequence	KY817957.1 Aquilaria crassna voucher CS-6 small subunit ribosomal RNA gene partial sequence internal transcribed spacer 1 5.8S ribosomal RNA gene and internal transcribed spacer 2 complete sequence and large subunit ribosomal RNA gene partial sequence	0	0
KU238037.1 Aquilaria crassna voucher FBL G10 WC2 internal transcribed spacer 2 partial sequence	KY817957.1 Aquilaria crassna voucher CS-6 small subunit ribosomal RNA gene partial sequence internal transcribed spacer 1 5.8S ribosomal RNA gene and internal transcribed spacer 2 complete sequence and large subunit ribosomal RNA gene partial sequence	0.0027248	0.00273681
KU238035.1 Aquilaria crassna voucher FBL G04 WC1 internal transcribed spacer 2 partial sequence	KY817957.1 Aquilaria crassna voucher CS-6 small subunit ribosomal RNA gene partial sequence internal transcribed spacer 1 5.8S ribosomal RNA gene and internal transcribed spacer 2 complete sequence and large subunit ribosomal RNA gene partial sequence	0.0027248	0.00273681
KU244085.1 Aquilaria crassna voucher FBL01017 internal transcribed spacer 1 partial sequence 5.8S ribosomal RNA gene complete sequence and internal transcribed spacer 2 partial sequence	KY817957.1 Aquilaria crassna voucher CS-6 small subunit ribosomal RNA gene partial sequence internal transcribed spacer 1 5.8S ribosomal RNA gene and internal transcribed spacer 2 complete sequence and large subunit ribosomal RNA gene partial sequence	0	0
KU244084.1 Aquilaria crassna voucher FBL01014 internal transcribed spacer 1 partial sequence 5.8S ribosomal RNA gene complete sequence and internal transcribed spacer 2 partial sequence	KY817957.1 Aquilaria crassna voucher CS-6 small subunit ribosomal RNA gene partial sequence internal transcribed spacer 1 5.8S ribosomal RNA gene and internal transcribed spacer 2 complete sequence and large subunit ribosomal RNA gene partial sequence	0	0
KU244083.1 Aquilaria crassna voucher FBL01013 internal transcribed spacer 1 partial sequence 5.8S ribosomal RNA gene complete sequence and internal transcribed spacer 2 partial sequence_{cra}	KY817957.1 Aquilaria crassna voucher CS-6 small subunit ribosomal RNA gene partial sequence internal transcribed spacer 1 5.8S ribosomal RNA gene and internal transcribed spacer 2 complete sequence and large subunit ribosomal RNA gene partial sequence	0	0
KU244082.1 Aquilaria crassna voucher FBL01012 internal transcribed spacer 1 partial sequence 5.8S ribosomal RNA gene complete sequence and internal transcribed spacer 2 partial sequence	KY817957.1 Aquilaria crassna voucher CS-6 small subunit ribosomal RNA gene partial sequence internal transcribed spacer 1 5.8S ribosomal RNA gene and internal transcribed spacer 2 complete sequence and large subunit ribosomal RNA gene partial sequence	0	0
KT364478.1 Aquilaria crassna voucher FBL01012 internal transcribed spacer 1 partial sequence 5.8S ribosomal RNA gene complete sequence and internal transcribed spacer 2 partial sequence	KY817957.1 Aquilaria crassna voucher CS-6 small subunit ribosomal RNA gene partial sequence internal transcribed spacer 1 5.8S ribosomal RNA gene and internal transcribed spacer 2 complete sequence and large subunit ribosomal RNA gene partial sequence	0	0
KY817982.1 Aquilaria crassna voucher S-9 small subunit ribosomal RNA gene partial sequence internal transcribed spacer 1 5.8S ribosomal RNA gene and internal transcribed spacer 2 complete sequence and large subunit ribosomal RNA gene partial sequence	KY817957.1 Aquilaria crassna voucher CS-6 small subunit ribosomal RNA gene partial sequence internal transcribed spacer 1 5.8S ribosomal RNA gene and internal transcribed spacer 2 complete sequence and large subunit ribosomal RNA gene partial sequence	0	0
KY817979.1 Aquilaria crassna voucher S-1 small subunit ribosomal RNA gene partial sequence internal transcribed spacer 1 5.8S ribosomal RNA gene and internal transcribed spacer 2 complete sequence and large subunit ribosomal RNA gene partial sequence	KY817957.1 Aquilaria crassna voucher CS-6 small subunit ribosomal RNA gene partial sequence internal transcribed spacer 1 5.8S ribosomal RNA gene and internal transcribed spacer 2 complete sequence and large subunit ribosomal RNA gene partial sequence	0	0
KY817973.1 Aquilaria crassna voucher ML-9 small subunit ribosomal RNA gene partial sequence internal transcribed spacer 1 5.8S ribosomal RNA gene and internal transcribed spacer 2 complete sequence and large subunit ribosomal RNA gene partial sequence	KY817957.1 Aquilaria crassna voucher CS-6 small subunit ribosomal RNA gene partial sequence internal transcribed spacer 1 5.8S ribosomal RNA gene and internal transcribed spacer 2 complete sequence and large subunit ribosomal RNA gene partial sequence	0	0
KY817972.1 Aquilaria crassna voucher ML-8 small subunit ribosomal RNA gene partial sequence internal transcribed spacer 1 5.8S ribosomal RNA gene and internal transcribed spacer 2 complete sequence and large subunit ribosomal RNA gene partial sequence	KY817957.1 Aquilaria crassna voucher CS-6 small subunit ribosomal RNA gene partial sequence internal transcribed spacer 1 5.8S ribosomal RNA gene and internal transcribed spacer 2 complete sequence and large subunit ribosomal RNA gene partial sequence	0	0
KY817971.1 Aquilaria crassna voucher ML-7 small subunit ribosomal RNA gene partial sequence internal transcribed spacer 1 5.8S ribosomal RNA gene and internal transcribed spacer 2 complete sequence and large subunit ribosomal RNA gene partial sequence	KY817957.1 Aquilaria crassna voucher CS-6 small subunit ribosomal RNA gene partial sequence internal transcribed spacer 1 5.8S ribosomal RNA gene and internal transcribed spacer 2 complete sequence and large subunit ribosomal RNA gene partial sequence	0	0
KY817970.1 Aquilaria crassna voucher ML-6 small subunit ribosomal RNA gene partial sequence internal transcribed spacer 1 5.8S ribosomal RNA gene and internal transcribed spacer 2 complete sequence and large subunit ribosomal RNA gene partial sequence	KY817957.1 Aquilaria crassna voucher CS-6 small subunit ribosomal RNA gene partial sequence internal transcribed spacer 1 5.8S ribosomal RNA gene and internal transcribed spacer 2 complete sequence and large subunit ribosomal RNA gene partial sequence	0	0
KY817969.1 Aquilaria crassna voucher ML-5 small subunit ribosomal RNA gene partial sequence internal transcribed spacer 1 5.8S ribosomal RNA gene and internal transcribed spacer 2 complete sequence and large subunit ribosomal RNA gene partial sequence	KY817957.1 Aquilaria crassna voucher CS-6 small subunit ribosomal RNA gene partial sequence internal transcribed spacer 1 5.8S ribosomal RNA gene and internal transcribed spacer 2 complete sequence and large subunit ribosomal RNA gene partial sequence	0	0
KY817968.1 Aquilaria crassna voucher ML-4 small subunit ribosomal RNA gene partial sequence internal transcribed spacer 1 5.8S ribosomal RNA gene and internal transcribed spacer 2 complete sequence and large subunit ribosomal RNA gene partial sequence	KY817957.1 Aquilaria crassna voucher CS-6 small subunit ribosomal RNA gene partial sequence internal transcribed spacer 1 5.8S ribosomal RNA gene and internal transcribed spacer 2 complete sequence and large subunit ribosomal RNA gene partial sequence	0	0
KY817967.1 Aquilaria crassna voucher ML-3 small subunit ribosomal RNA gene partial sequence internal transcribed spacer 1 5.8S ribosomal RNA gene and internal transcribed spacer 2 complete sequence and large subunit ribosomal RNA gene partial sequence	KY817957.1 Aquilaria crassna voucher CS-6 small subunit ribosomal RNA gene partial sequence internal transcribed spacer 1 5.8S ribosomal RNA gene and internal transcribed spacer 2 complete sequence and large subunit ribosomal RNA gene partial sequence	0	0
KY817964.1 Aquilaria crassna voucher CS-13 small subunit ribosomal RNA gene partial sequence internal transcribed spacer 1 5.8S ribosomal RNA gene and internal transcribed spacer 2 complete sequence and large subunit ribosomal RNA gene partial sequence	KY817957.1 Aquilaria crassna voucher CS-6 small subunit ribosomal RNA gene partial sequence internal transcribed spacer 1 5.8S ribosomal RNA gene and internal transcribed spacer 2 complete sequence and large subunit ribosomal RNA gene partial sequence	0	0
KY817963.1 Aquilaria crassna voucher CS-12 small subunit ribosomal RNA gene partial sequence internal transcribed spacer 1 5.8S ribosomal RNA gene and internal transcribed spacer 2 complete sequence and large subunit ribosomal RNA gene partial sequence	KY817957.1 Aquilaria crassna voucher CS-6 small subunit ribosomal RNA gene partial sequence internal transcribed spacer 1 5.8S ribosomal RNA gene and internal transcribed spacer 2 complete sequence and large subunit ribosomal RNA gene partial sequence	0	0
KY817962.1 Aquilaria crassna voucher CS-11 small subunit ribosomal RNA gene partial sequence internal transcribed spacer 1 5.8S ribosomal RNA gene and internal transcribed spacer 2 complete sequence and large subunit ribosomal RNA gene partial sequence	KY817957.1 Aquilaria crassna voucher CS-6 small subunit ribosomal RNA gene partial sequence internal transcribed spacer 1 5.8S ribosomal RNA gene and internal transcribed spacer 2 complete sequence and large subunit ribosomal RNA gene partial sequence	0	0
KY817961.1 Aquilaria crassna voucher CS-10 small subunit ribosomal RNA gene partial sequence internal transcribed spacer 1 5.8S ribosomal RNA gene and internal transcribed spacer 2 complete sequence and large subunit ribosomal RNA gene partial sequence	KY817957.1 Aquilaria crassna voucher CS-6 small subunit ribosomal RNA gene partial sequence internal transcribed spacer 1 5.8S ribosomal RNA gene and internal transcribed spacer 2 complete sequence and large subunit ribosomal RNA gene partial sequence	0	0
KY817959.1 Aquilaria crassna voucher CS-8 small subunit ribosomal RNA gene partial sequence internal transcribed spacer 1 5.8S ribosomal RNA gene and internal transcribed spacer 2 complete sequence and large subunit ribosomal RNA gene partial sequence	KY817957.1 Aquilaria crassna voucher CS-6 small subunit ribosomal RNA gene partial sequence internal transcribed spacer 1 5.8S ribosomal RNA gene and internal transcribed spacer 2 complete sequence and large subunit ribosomal RNA gene partial sequence	0	0
KY817958.1 Aquilaria crassna voucher CS-7 small subunit ribosomal RNA gene partial sequence internal transcribed spacer 1 5.8S ribosomal RNA gene and internal transcribed spacer 2 complete sequence and large subunit ribosomal RNA gene partial sequence	KY817957.1 Aquilaria crassna voucher CS-6 small subunit ribosomal RNA gene partial sequence internal transcribed spacer 1 5.8S ribosomal RNA gene and internal transcribed spacer 2 complete sequence and large subunit ribosomal RNA gene partial sequence	0	0
MH134137.1 Aquilaria agallochum internal transcribed spacer 1 partial sequence 5.8S ribosomal RNA gene complete sequence and internal transcribed spacer 2 partial sequence_{aga}	KY817953.1 Aquilaria crassna voucher CS-2 small subunit ribosomal RNA gene partial sequence internal transcribed spacer 1 5.8S ribosomal RNA gene and internal transcribed spacer 2 complete sequence and large subunit ribosomal RNA gene partial sequence	0.0165072	0.0059524
KU879012.1 Aquilaria agallochum 18S ribosomal RNA gene partial sequence internal transcribed spacer 1 5.8S ribosomal RNA gene and internal transcribed spacer 2 complete sequence and 28S ribosomal RNA gene partial sequence_{aga}	KY817953.1 Aquilaria crassna voucher CS-2 small subunit ribosomal RNA gene partial sequence internal transcribed spacer 1 5.8S ribosomal RNA gene and internal transcribed spacer 2 complete sequence and large subunit ribosomal RNA gene partial sequence	0.0221253	0.00719082
MH134138.1 Aquilaria beccariana internal transcribed spacer 1 partial sequence 5.8S ribosomal RNA gene complete sequence and internal transcribed spacer 2 partial sequence_{aga}	KY817953.1 Aquilaria crassna voucher CS-2 small subunit ribosomal RNA gene partial sequence internal transcribed spacer 1 5.8S ribosomal RNA gene and internal transcribed spacer 2 complete sequence and large subunit ribosomal RNA gene partial sequence	0.0220708	0.00727399
KT779116.1 Aquilaria beccariana voucher FBL04001 internal transcribed spacer 1 partial sequence 5.8S ribosomal RNA gene complete sequence and internal transcribed spacer 2 partial sequence_{aga}	KY817953.1 Aquilaria crassna voucher CS-2 small subunit ribosomal RNA gene partial sequence internal transcribed spacer 1 5.8S ribosomal RNA gene and internal transcribed spacer 2 complete sequence and large subunit ribosomal RNA gene partial sequence	0.0421308	0.0101917
KT364477.1 Aquilaria beccariana voucher SFN29381 internal transcribed spacer 1 partial sequence 5.8S ribosomal RNA gene complete sequence and internal transcribed spacer 2 partial sequence_{aga}	KY817953.1 Aquilaria crassna voucher CS-2 small subunit ribosomal RNA gene partial sequence internal transcribed spacer 1 5.8S ribosomal RNA gene and internal transcribed spacer 2 complete sequence and large subunit ribosomal RNA gene partial sequence	0.0221534	0.00722737
KX351419.1 Aquilaria beccariana voucher S1 5.8S ribosomal RNA gene partial sequence internal transcribed spacer 2 complete sequence and large subunit ribosomal RNA gene partial sequence_{aga}	KY817953.1 Aquilaria crassna voucher CS-2 small subunit ribosomal RNA gene partial sequence internal transcribed spacer 1 5.8S ribosomal RNA gene and internal transcribed spacer 2 complete sequence and large subunit ribosomal RNA gene partial sequence	0	0
KX424704.1 Aquilaria beccariana 5.8S ribosomal RNA gene partial sequence internal transcribed spacer 2 complete sequence and 28S ribosomal RNA gene partial sequence_{aga}	KY817953.1 Aquilaria crassna voucher CS-2 small subunit ribosomal RNA gene partial sequence internal transcribed spacer 1 5.8S ribosomal RNA gene and internal transcribed spacer 2 complete sequence and large subunit ribosomal RNA gene partial sequence	0.0438711	0.011062
KU238038.1 Aquilaria crassna voucher FBL G11 WC3 internal transcribed spacer 2 partial sequence	KY817953.1 Aquilaria crassna voucher CS-2 small subunit ribosomal RNA gene partial sequence internal transcribed spacer 1 5.8S ribosomal RNA gene and internal transcribed spacer 2 complete sequence and large subunit ribosomal RNA gene partial sequence	0	0
MH134139.1 Aquilaria crassna internal transcribed spacer 1 partial sequence 5.8S ribosomal RNA gene complete sequence and internal transcribed spacer 2 partial sequence	KY817953.1 Aquilaria crassna voucher CS-2 small subunit ribosomal RNA gene partial sequence internal transcribed spacer 1 5.8S ribosomal RNA gene and internal transcribed spacer 2 complete sequence and large subunit ribosomal RNA gene partial sequence	0	0
KU244111.1 Aquilaria crassna voucher FBL01017 internal transcribed spacer 2 partial sequence	KY817953.1 Aquilaria crassna voucher CS-2 small subunit ribosomal RNA gene partial sequence internal transcribed spacer 1 5.8S ribosomal RNA gene and internal transcribed spacer 2 complete sequence and large subunit ribosomal RNA gene partial sequence	0	0
KU244110.1 Aquilaria crassna voucher FBL01014 internal transcribed spacer 2 partial sequence	KY817953.1 Aquilaria crassna voucher CS-2 small subunit ribosomal RNA gene partial sequence internal transcribed spacer 1 5.8S ribosomal RNA gene and internal transcribed spacer 2 complete sequence and large subunit ribosomal RNA gene partial sequence	0	0
KU244109.1 Aquilaria crassna voucher FBL01013 internal transcribed spacer 2 partial sequence	KY817953.1 Aquilaria crassna voucher CS-2 small subunit ribosomal RNA gene partial sequence internal transcribed spacer 1 5.8S ribosomal RNA gene and internal transcribed spacer 2 complete sequence and large subunit ribosomal RNA gene partial sequence	0	0
KU244108.1 Aquilaria crassna voucher FBL01012 internal transcribed spacer 2 partial sequence	KY817953.1 Aquilaria crassna voucher CS-2 small subunit ribosomal RNA gene partial sequence internal transcribed spacer 1 5.8S ribosomal RNA gene and internal transcribed spacer 2 complete sequence and large subunit ribosomal RNA gene partial sequence	0	0
KU238037.1 Aquilaria crassna voucher FBL G10 WC2 internal transcribed spacer 2 partial sequence	KY817953.1 Aquilaria crassna voucher CS-2 small subunit ribosomal RNA gene partial sequence internal transcribed spacer 1 5.8S ribosomal RNA gene and internal transcribed spacer 2 complete sequence and large subunit ribosomal RNA gene partial sequence	0.0027248	0.00273681
KU238035.1 Aquilaria crassna voucher FBL G04 WC1 internal transcribed spacer 2 partial sequence	KY817953.1 Aquilaria crassna voucher CS-2 small subunit ribosomal RNA gene partial sequence internal transcribed spacer 1 5.8S ribosomal RNA gene and internal transcribed spacer 2 complete sequence and large subunit ribosomal RNA gene partial sequence	0.0027248	0.00273681
KU244085.1 Aquilaria crassna voucher FBL01017 internal transcribed spacer 1 partial sequence 5.8S ribosomal RNA gene complete sequence and internal transcribed spacer 2 partial sequence	KY817953.1 Aquilaria crassna voucher CS-2 small subunit ribosomal RNA gene partial sequence internal transcribed spacer 1 5.8S ribosomal RNA gene and internal transcribed spacer 2 complete sequence and large subunit ribosomal RNA gene partial sequence	0	0
KU244084.1 Aquilaria crassna voucher FBL01014 internal transcribed spacer 1 partial sequence 5.8S ribosomal RNA gene complete sequence and internal transcribed spacer 2 partial sequence	KY817953.1 Aquilaria crassna voucher CS-2 small subunit ribosomal RNA gene partial sequence internal transcribed spacer 1 5.8S ribosomal RNA gene and internal transcribed spacer 2 complete sequence and large subunit ribosomal RNA gene partial sequence	0	0
KU244083.1 Aquilaria crassna voucher FBL01013 internal transcribed spacer 1 partial sequence 5.8S ribosomal RNA gene complete sequence and internal transcribed spacer 2 partial sequence_{cra}	KY817953.1 Aquilaria crassna voucher CS-2 small subunit ribosomal RNA gene partial sequence internal transcribed spacer 1 5.8S ribosomal RNA gene and internal transcribed spacer 2 complete sequence and large subunit ribosomal RNA gene partial sequence	0	0
KU244082.1 Aquilaria crassna voucher FBL01012 internal transcribed spacer 1 partial sequence 5.8S ribosomal RNA gene complete sequence and internal transcribed spacer 2 partial sequence	KY817953.1 Aquilaria crassna voucher CS-2 small subunit ribosomal RNA gene partial sequence internal transcribed spacer 1 5.8S ribosomal RNA gene and internal transcribed spacer 2 complete sequence and large subunit ribosomal RNA gene partial sequence	0	0
KT364478.1 Aquilaria crassna voucher FBL01012 internal transcribed spacer 1 partial sequence 5.8S ribosomal RNA gene complete sequence and internal transcribed spacer 2 partial sequence	KY817953.1 Aquilaria crassna voucher CS-2 small subunit ribosomal RNA gene partial sequence internal transcribed spacer 1 5.8S ribosomal RNA gene and internal transcribed spacer 2 complete sequence and large subunit ribosomal RNA gene partial sequence	0	0
KY817982.1 Aquilaria crassna voucher S-9 small subunit ribosomal RNA gene partial sequence internal transcribed spacer 1 5.8S ribosomal RNA gene and internal transcribed spacer 2 complete sequence and large subunit ribosomal RNA gene partial sequence	KY817953.1 Aquilaria crassna voucher CS-2 small subunit ribosomal RNA gene partial sequence internal transcribed spacer 1 5.8S ribosomal RNA gene and internal transcribed spacer 2 complete sequence and large subunit ribosomal RNA gene partial sequence	0	0
KY817979.1 Aquilaria crassna voucher S-1 small subunit ribosomal RNA gene partial sequence internal transcribed spacer 1 5.8S ribosomal RNA gene and internal transcribed spacer 2 complete sequence and large subunit ribosomal RNA gene partial sequence	KY817953.1 Aquilaria crassna voucher CS-2 small subunit ribosomal RNA gene partial sequence internal transcribed spacer 1 5.8S ribosomal RNA gene and internal transcribed spacer 2 complete sequence and large subunit ribosomal RNA gene partial sequence	0	0
KY817973.1 Aquilaria crassna voucher ML-9 small subunit ribosomal RNA gene partial sequence internal transcribed spacer 1 5.8S ribosomal RNA gene and internal transcribed spacer 2 complete sequence and large subunit ribosomal RNA gene partial sequence	KY817953.1 Aquilaria crassna voucher CS-2 small subunit ribosomal RNA gene partial sequence internal transcribed spacer 1 5.8S ribosomal RNA gene and internal transcribed spacer 2 complete sequence and large subunit ribosomal RNA gene partial sequence	0	0
KY817972.1 Aquilaria crassna voucher ML-8 small subunit ribosomal RNA gene partial sequence internal transcribed spacer 1 5.8S ribosomal RNA gene and internal transcribed spacer 2 complete sequence and large subunit ribosomal RNA gene partial sequence	KY817953.1 Aquilaria crassna voucher CS-2 small subunit ribosomal RNA gene partial sequence internal transcribed spacer 1 5.8S ribosomal RNA gene and internal transcribed spacer 2 complete sequence and large subunit ribosomal RNA gene partial sequence	0	0
KY817971.1 Aquilaria crassna voucher ML-7 small subunit ribosomal RNA gene partial sequence internal transcribed spacer 1 5.8S ribosomal RNA gene and internal transcribed spacer 2 complete sequence and large subunit ribosomal RNA gene partial sequence	KY817953.1 Aquilaria crassna voucher CS-2 small subunit ribosomal RNA gene partial sequence internal transcribed spacer 1 5.8S ribosomal RNA gene and internal transcribed spacer 2 complete sequence and large subunit ribosomal RNA gene partial sequence	0	0
KY817970.1 Aquilaria crassna voucher ML-6 small subunit ribosomal RNA gene partial sequence internal transcribed spacer 1 5.8S ribosomal RNA gene and internal transcribed spacer 2 complete sequence and large subunit ribosomal RNA gene partial sequence	KY817953.1 Aquilaria crassna voucher CS-2 small subunit ribosomal RNA gene partial sequence internal transcribed spacer 1 5.8S ribosomal RNA gene and internal transcribed spacer 2 complete sequence and large subunit ribosomal RNA gene partial sequence	0	0
KY817969.1 Aquilaria crassna voucher ML-5 small subunit ribosomal RNA gene partial sequence internal transcribed spacer 1 5.8S ribosomal RNA gene and internal transcribed spacer 2 complete sequence and large subunit ribosomal RNA gene partial sequence	KY817953.1 Aquilaria crassna voucher CS-2 small subunit ribosomal RNA gene partial sequence internal transcribed spacer 1 5.8S ribosomal RNA gene and internal transcribed spacer 2 complete sequence and large subunit ribosomal RNA gene partial sequence	0	0
KY817968.1 Aquilaria crassna voucher ML-4 small subunit ribosomal RNA gene partial sequence internal transcribed spacer 1 5.8S ribosomal RNA gene and internal transcribed spacer 2 complete sequence and large subunit ribosomal RNA gene partial sequence	KY817953.1 Aquilaria crassna voucher CS-2 small subunit ribosomal RNA gene partial sequence internal transcribed spacer 1 5.8S ribosomal RNA gene and internal transcribed spacer 2 complete sequence and large subunit ribosomal RNA gene partial sequence	0	0
KY817967.1 Aquilaria crassna voucher ML-3 small subunit ribosomal RNA gene partial sequence internal transcribed spacer 1 5.8S ribosomal RNA gene and internal transcribed spacer 2 complete sequence and large subunit ribosomal RNA gene partial sequence	KY817953.1 Aquilaria crassna voucher CS-2 small subunit ribosomal RNA gene partial sequence internal transcribed spacer 1 5.8S ribosomal RNA gene and internal transcribed spacer 2 complete sequence and large subunit ribosomal RNA gene partial sequence	0	0
KY817964.1 Aquilaria crassna voucher CS-13 small subunit ribosomal RNA gene partial sequence internal transcribed spacer 1 5.8S ribosomal RNA gene and internal transcribed spacer 2 complete sequence and large subunit ribosomal RNA gene partial sequence	KY817953.1 Aquilaria crassna voucher CS-2 small subunit ribosomal RNA gene partial sequence internal transcribed spacer 1 5.8S ribosomal RNA gene and internal transcribed spacer 2 complete sequence and large subunit ribosomal RNA gene partial sequence	0	0
KY817963.1 Aquilaria crassna voucher CS-12 small subunit ribosomal RNA gene partial sequence internal transcribed spacer 1 5.8S ribosomal RNA gene and internal transcribed spacer 2 complete sequence and large subunit ribosomal RNA gene partial sequence	KY817953.1 Aquilaria crassna voucher CS-2 small subunit ribosomal RNA gene partial sequence internal transcribed spacer 1 5.8S ribosomal RNA gene and internal transcribed spacer 2 complete sequence and large subunit ribosomal RNA gene partial sequence	0	0
KY817962.1 Aquilaria crassna voucher CS-11 small subunit ribosomal RNA gene partial sequence internal transcribed spacer 1 5.8S ribosomal RNA gene and internal transcribed spacer 2 complete sequence and large subunit ribosomal RNA gene partial sequence	KY817953.1 Aquilaria crassna voucher CS-2 small subunit ribosomal RNA gene partial sequence internal transcribed spacer 1 5.8S ribosomal RNA gene and internal transcribed spacer 2 complete sequence and large subunit ribosomal RNA gene partial sequence	0	0
KY817961.1 Aquilaria crassna voucher CS-10 small subunit ribosomal RNA gene partial sequence internal transcribed spacer 1 5.8S ribosomal RNA gene and internal transcribed spacer 2 complete sequence and large subunit ribosomal RNA gene partial sequence	KY817953.1 Aquilaria crassna voucher CS-2 small subunit ribosomal RNA gene partial sequence internal transcribed spacer 1 5.8S ribosomal RNA gene and internal transcribed spacer 2 complete sequence and large subunit ribosomal RNA gene partial sequence	0	0
KY817959.1 Aquilaria crassna voucher CS-8 small subunit ribosomal RNA gene partial sequence internal transcribed spacer 1 5.8S ribosomal RNA gene and internal transcribed spacer 2 complete sequence and large subunit ribosomal RNA gene partial sequence	KY817953.1 Aquilaria crassna voucher CS-2 small subunit ribosomal RNA gene partial sequence internal transcribed spacer 1 5.8S ribosomal RNA gene and internal transcribed spacer 2 complete sequence and large subunit ribosomal RNA gene partial sequence	0	0
KY817958.1 Aquilaria crassna voucher CS-7 small subunit ribosomal RNA gene partial sequence internal transcribed spacer 1 5.8S ribosomal RNA gene and internal transcribed spacer 2 complete sequence and large subunit ribosomal RNA gene partial sequence	KY817953.1 Aquilaria crassna voucher CS-2 small subunit ribosomal RNA gene partial sequence internal transcribed spacer 1 5.8S ribosomal RNA gene and internal transcribed spacer 2 complete sequence and large subunit ribosomal RNA gene partial sequence	0	0
KY817957.1 Aquilaria crassna voucher CS-6 small subunit ribosomal RNA gene partial sequence internal transcribed spacer 1 5.8S ribosomal RNA gene and internal transcribed spacer 2 complete sequence and large subunit ribosomal RNA gene partial sequence	KY817953.1 Aquilaria crassna voucher CS-2 small subunit ribosomal RNA gene partial sequence internal transcribed spacer 1 5.8S ribosomal RNA gene and internal transcribed spacer 2 complete sequence and large subunit ribosomal RNA gene partial sequence	0	0
MH134137.1 Aquilaria agallochum internal transcribed spacer 1 partial sequence 5.8S ribosomal RNA gene complete sequence and internal transcribed spacer 2 partial sequence_{aga}	KY817951.1 Aquilaria crassna voucher TP-27 small subunit ribosomal RNA gene partial sequence internal transcribed spacer 1 5.8S ribosomal RNA gene and internal transcribed spacer 2 complete sequence and large subunit ribosomal RNA gene partial sequence	0.0165072	0.0059524
KU879012.1 Aquilaria agallochum 18S ribosomal RNA gene partial sequence internal transcribed spacer 1 5.8S ribosomal RNA gene and internal transcribed spacer 2 complete sequence and 28S ribosomal RNA gene partial sequence_{aga}	KY817951.1 Aquilaria crassna voucher TP-27 small subunit ribosomal RNA gene partial sequence internal transcribed spacer 1 5.8S ribosomal RNA gene and internal transcribed spacer 2 complete sequence and large subunit ribosomal RNA gene partial sequence	0.0221253	0.00719082
MH134138.1 Aquilaria beccariana internal transcribed spacer 1 partial sequence 5.8S ribosomal RNA gene complete sequence and internal transcribed spacer 2 partial sequence_{aga}	KY817951.1 Aquilaria crassna voucher TP-27 small subunit ribosomal RNA gene partial sequence internal transcribed spacer 1 5.8S ribosomal RNA gene and internal transcribed spacer 2 complete sequence and large subunit ribosomal RNA gene partial sequence	0.0220708	0.00727399
KT779116.1 Aquilaria beccariana voucher FBL04001 internal transcribed spacer 1 partial sequence 5.8S ribosomal RNA gene complete sequence and internal transcribed spacer 2 partial sequence_{aga}	KY817951.1 Aquilaria crassna voucher TP-27 small subunit ribosomal RNA gene partial sequence internal transcribed spacer 1 5.8S ribosomal RNA gene and internal transcribed spacer 2 complete sequence and large subunit ribosomal RNA gene partial sequence	0.0421308	0.0101917
KT364477.1 Aquilaria beccariana voucher SFN29381 internal transcribed spacer 1 partial sequence 5.8S ribosomal RNA gene complete sequence and internal transcribed spacer 2 partial sequence_{aga}	KY817951.1 Aquilaria crassna voucher TP-27 small subunit ribosomal RNA gene partial sequence internal transcribed spacer 1 5.8S ribosomal RNA gene and internal transcribed spacer 2 complete sequence and large subunit ribosomal RNA gene partial sequence	0.0221534	0.00722737
KX351419.1 Aquilaria beccariana voucher S1 5.8S ribosomal RNA gene partial sequence internal transcribed spacer 2 complete sequence and large subunit ribosomal RNA gene partial sequence_{aga}	KY817951.1 Aquilaria crassna voucher TP-27 small subunit ribosomal RNA gene partial sequence internal transcribed spacer 1 5.8S ribosomal RNA gene and internal transcribed spacer 2 complete sequence and large subunit ribosomal RNA gene partial sequence	0	0
KX424704.1 Aquilaria beccariana 5.8S ribosomal RNA gene partial sequence internal transcribed spacer 2 complete sequence and 28S ribosomal RNA gene partial sequence_{aga}	KY817951.1 Aquilaria crassna voucher TP-27 small subunit ribosomal RNA gene partial sequence internal transcribed spacer 1 5.8S ribosomal RNA gene and internal transcribed spacer 2 complete sequence and large subunit ribosomal RNA gene partial sequence	0.0438711	0.011062
KU238038.1 Aquilaria crassna voucher FBL G11 WC3 internal transcribed spacer 2 partial sequence	KY817951.1 Aquilaria crassna voucher TP-27 small subunit ribosomal RNA gene partial sequence internal transcribed spacer 1 5.8S ribosomal RNA gene and internal transcribed spacer 2 complete sequence and large subunit ribosomal RNA gene partial sequence	0	0
MH134139.1 Aquilaria crassna internal transcribed spacer 1 partial sequence 5.8S ribosomal RNA gene complete sequence and internal transcribed spacer 2 partial sequence	KY817951.1 Aquilaria crassna voucher TP-27 small subunit ribosomal RNA gene partial sequence internal transcribed spacer 1 5.8S ribosomal RNA gene and internal transcribed spacer 2 complete sequence and large subunit ribosomal RNA gene partial sequence	0	0
KU244111.1 Aquilaria crassna voucher FBL01017 internal transcribed spacer 2 partial sequence	KY817951.1 Aquilaria crassna voucher TP-27 small subunit ribosomal RNA gene partial sequence internal transcribed spacer 1 5.8S ribosomal RNA gene and internal transcribed spacer 2 complete sequence and large subunit ribosomal RNA gene partial sequence	0	0
KU244110.1 Aquilaria crassna voucher FBL01014 internal transcribed spacer 2 partial sequence	KY817951.1 Aquilaria crassna voucher TP-27 small subunit ribosomal RNA gene partial sequence internal transcribed spacer 1 5.8S ribosomal RNA gene and internal transcribed spacer 2 complete sequence and large subunit ribosomal RNA gene partial sequence	0	0
KU244109.1 Aquilaria crassna voucher FBL01013 internal transcribed spacer 2 partial sequence	KY817951.1 Aquilaria crassna voucher TP-27 small subunit ribosomal RNA gene partial sequence internal transcribed spacer 1 5.8S ribosomal RNA gene and internal transcribed spacer 2 complete sequence and large subunit ribosomal RNA gene partial sequence	0	0
KU244108.1 Aquilaria crassna voucher FBL01012 internal transcribed spacer 2 partial sequence	KY817951.1 Aquilaria crassna voucher TP-27 small subunit ribosomal RNA gene partial sequence internal transcribed spacer 1 5.8S ribosomal RNA gene and internal transcribed spacer 2 complete sequence and large subunit ribosomal RNA gene partial sequence	0	0
KU238037.1 Aquilaria crassna voucher FBL G10 WC2 internal transcribed spacer 2 partial sequence	KY817951.1 Aquilaria crassna voucher TP-27 small subunit ribosomal RNA gene partial sequence internal transcribed spacer 1 5.8S ribosomal RNA gene and internal transcribed spacer 2 complete sequence and large subunit ribosomal RNA gene partial sequence	0.0027248	0.00273681
KU238035.1 Aquilaria crassna voucher FBL G04 WC1 internal transcribed spacer 2 partial sequence	KY817951.1 Aquilaria crassna voucher TP-27 small subunit ribosomal RNA gene partial sequence internal transcribed spacer 1 5.8S ribosomal RNA gene and internal transcribed spacer 2 complete sequence and large subunit ribosomal RNA gene partial sequence	0.0027248	0.00273681
KU244085.1 Aquilaria crassna voucher FBL01017 internal transcribed spacer 1 partial sequence 5.8S ribosomal RNA gene complete sequence and internal transcribed spacer 2 partial sequence	KY817951.1 Aquilaria crassna voucher TP-27 small subunit ribosomal RNA gene partial sequence internal transcribed spacer 1 5.8S ribosomal RNA gene and internal transcribed spacer 2 complete sequence and large subunit ribosomal RNA gene partial sequence	0	0
KU244084.1 Aquilaria crassna voucher FBL01014 internal transcribed spacer 1 partial sequence 5.8S ribosomal RNA gene complete sequence and internal transcribed spacer 2 partial sequence	KY817951.1 Aquilaria crassna voucher TP-27 small subunit ribosomal RNA gene partial sequence internal transcribed spacer 1 5.8S ribosomal RNA gene and internal transcribed spacer 2 complete sequence and large subunit ribosomal RNA gene partial sequence	0	0
KU244083.1 Aquilaria crassna voucher FBL01013 internal transcribed spacer 1 partial sequence 5.8S ribosomal RNA gene complete sequence and internal transcribed spacer 2 partial sequence_{cra}	KY817951.1 Aquilaria crassna voucher TP-27 small subunit ribosomal RNA gene partial sequence internal transcribed spacer 1 5.8S ribosomal RNA gene and internal transcribed spacer 2 complete sequence and large subunit ribosomal RNA gene partial sequence	0	0
KU244082.1 Aquilaria crassna voucher FBL01012 internal transcribed spacer 1 partial sequence 5.8S ribosomal RNA gene complete sequence and internal transcribed spacer 2 partial sequence	KY817951.1 Aquilaria crassna voucher TP-27 small subunit ribosomal RNA gene partial sequence internal transcribed spacer 1 5.8S ribosomal RNA gene and internal transcribed spacer 2 complete sequence and large subunit ribosomal RNA gene partial sequence	0	0
KT364478.1 Aquilaria crassna voucher FBL01012 internal transcribed spacer 1 partial sequence 5.8S ribosomal RNA gene complete sequence and internal transcribed spacer 2 partial sequence	KY817951.1 Aquilaria crassna voucher TP-27 small subunit ribosomal RNA gene partial sequence internal transcribed spacer 1 5.8S ribosomal RNA gene and internal transcribed spacer 2 complete sequence and large subunit ribosomal RNA gene partial sequence	0	0
KY817982.1 Aquilaria crassna voucher S-9 small subunit ribosomal RNA gene partial sequence internal transcribed spacer 1 5.8S ribosomal RNA gene and internal transcribed spacer 2 complete sequence and large subunit ribosomal RNA gene partial sequence	KY817951.1 Aquilaria crassna voucher TP-27 small subunit ribosomal RNA gene partial sequence internal transcribed spacer 1 5.8S ribosomal RNA gene and internal transcribed spacer 2 complete sequence and large subunit ribosomal RNA gene partial sequence	0	0
KY817979.1 Aquilaria crassna voucher S-1 small subunit ribosomal RNA gene partial sequence internal transcribed spacer 1 5.8S ribosomal RNA gene and internal transcribed spacer 2 complete sequence and large subunit ribosomal RNA gene partial sequence	KY817951.1 Aquilaria crassna voucher TP-27 small subunit ribosomal RNA gene partial sequence internal transcribed spacer 1 5.8S ribosomal RNA gene and internal transcribed spacer 2 complete sequence and large subunit ribosomal RNA gene partial sequence	0	0
KY817973.1 Aquilaria crassna voucher ML-9 small subunit ribosomal RNA gene partial sequence internal transcribed spacer 1 5.8S ribosomal RNA gene and internal transcribed spacer 2 complete sequence and large subunit ribosomal RNA gene partial sequence	KY817951.1 Aquilaria crassna voucher TP-27 small subunit ribosomal RNA gene partial sequence internal transcribed spacer 1 5.8S ribosomal RNA gene and internal transcribed spacer 2 complete sequence and large subunit ribosomal RNA gene partial sequence	0	0
KY817972.1 Aquilaria crassna voucher ML-8 small subunit ribosomal RNA gene partial sequence internal transcribed spacer 1 5.8S ribosomal RNA gene and internal transcribed spacer 2 complete sequence and large subunit ribosomal RNA gene partial sequence	KY817951.1 Aquilaria crassna voucher TP-27 small subunit ribosomal RNA gene partial sequence internal transcribed spacer 1 5.8S ribosomal RNA gene and internal transcribed spacer 2 complete sequence and large subunit ribosomal RNA gene partial sequence	0	0
KY817971.1 Aquilaria crassna voucher ML-7 small subunit ribosomal RNA gene partial sequence internal transcribed spacer 1 5.8S ribosomal RNA gene and internal transcribed spacer 2 complete sequence and large subunit ribosomal RNA gene partial sequence	KY817951.1 Aquilaria crassna voucher TP-27 small subunit ribosomal RNA gene partial sequence internal transcribed spacer 1 5.8S ribosomal RNA gene and internal transcribed spacer 2 complete sequence and large subunit ribosomal RNA gene partial sequence	0	0
KY817970.1 Aquilaria crassna voucher ML-6 small subunit ribosomal RNA gene partial sequence internal transcribed spacer 1 5.8S ribosomal RNA gene and internal transcribed spacer 2 complete sequence and large subunit ribosomal RNA gene partial sequence	KY817951.1 Aquilaria crassna voucher TP-27 small subunit ribosomal RNA gene partial sequence internal transcribed spacer 1 5.8S ribosomal RNA gene and internal transcribed spacer 2 complete sequence and large subunit ribosomal RNA gene partial sequence	0	0
KY817969.1 Aquilaria crassna voucher ML-5 small subunit ribosomal RNA gene partial sequence internal transcribed spacer 1 5.8S ribosomal RNA gene and internal transcribed spacer 2 complete sequence and large subunit ribosomal RNA gene partial sequence	KY817951.1 Aquilaria crassna voucher TP-27 small subunit ribosomal RNA gene partial sequence internal transcribed spacer 1 5.8S ribosomal RNA gene and internal transcribed spacer 2 complete sequence and large subunit ribosomal RNA gene partial sequence	0	0
KY817968.1 Aquilaria crassna voucher ML-4 small subunit ribosomal RNA gene partial sequence internal transcribed spacer 1 5.8S ribosomal RNA gene and internal transcribed spacer 2 complete sequence and large subunit ribosomal RNA gene partial sequence	KY817951.1 Aquilaria crassna voucher TP-27 small subunit ribosomal RNA gene partial sequence internal transcribed spacer 1 5.8S ribosomal RNA gene and internal transcribed spacer 2 complete sequence and large subunit ribosomal RNA gene partial sequence	0	0
KY817967.1 Aquilaria crassna voucher ML-3 small subunit ribosomal RNA gene partial sequence internal transcribed spacer 1 5.8S ribosomal RNA gene and internal transcribed spacer 2 complete sequence and large subunit ribosomal RNA gene partial sequence	KY817951.1 Aquilaria crassna voucher TP-27 small subunit ribosomal RNA gene partial sequence internal transcribed spacer 1 5.8S ribosomal RNA gene and internal transcribed spacer 2 complete sequence and large subunit ribosomal RNA gene partial sequence	0	0
KY817964.1 Aquilaria crassna voucher CS-13 small subunit ribosomal RNA gene partial sequence internal transcribed spacer 1 5.8S ribosomal RNA gene and internal transcribed spacer 2 complete sequence and large subunit ribosomal RNA gene partial sequence	KY817951.1 Aquilaria crassna voucher TP-27 small subunit ribosomal RNA gene partial sequence internal transcribed spacer 1 5.8S ribosomal RNA gene and internal transcribed spacer 2 complete sequence and large subunit ribosomal RNA gene partial sequence	0	0
KY817963.1 Aquilaria crassna voucher CS-12 small subunit ribosomal RNA gene partial sequence internal transcribed spacer 1 5.8S ribosomal RNA gene and internal transcribed spacer 2 complete sequence and large subunit ribosomal RNA gene partial sequence	KY817951.1 Aquilaria crassna voucher TP-27 small subunit ribosomal RNA gene partial sequence internal transcribed spacer 1 5.8S ribosomal RNA gene and internal transcribed spacer 2 complete sequence and large subunit ribosomal RNA gene partial sequence	0	0
KY817962.1 Aquilaria crassna voucher CS-11 small subunit ribosomal RNA gene partial sequence internal transcribed spacer 1 5.8S ribosomal RNA gene and internal transcribed spacer 2 complete sequence and large subunit ribosomal RNA gene partial sequence	KY817951.1 Aquilaria crassna voucher TP-27 small subunit ribosomal RNA gene partial sequence internal transcribed spacer 1 5.8S ribosomal RNA gene and internal transcribed spacer 2 complete sequence and large subunit ribosomal RNA gene partial sequence	0	0
KY817961.1 Aquilaria crassna voucher CS-10 small subunit ribosomal RNA gene partial sequence internal transcribed spacer 1 5.8S ribosomal RNA gene and internal transcribed spacer 2 complete sequence and large subunit ribosomal RNA gene partial sequence	KY817951.1 Aquilaria crassna voucher TP-27 small subunit ribosomal RNA gene partial sequence internal transcribed spacer 1 5.8S ribosomal RNA gene and internal transcribed spacer 2 complete sequence and large subunit ribosomal RNA gene partial sequence	0	0
KY817959.1 Aquilaria crassna voucher CS-8 small subunit ribosomal RNA gene partial sequence internal transcribed spacer 1 5.8S ribosomal RNA gene and internal transcribed spacer 2 complete sequence and large subunit ribosomal RNA gene partial sequence	KY817951.1 Aquilaria crassna voucher TP-27 small subunit ribosomal RNA gene partial sequence internal transcribed spacer 1 5.8S ribosomal RNA gene and internal transcribed spacer 2 complete sequence and large subunit ribosomal RNA gene partial sequence	0	0
KY817958.1 Aquilaria crassna voucher CS-7 small subunit ribosomal RNA gene partial sequence internal transcribed spacer 1 5.8S ribosomal RNA gene and internal transcribed spacer 2 complete sequence and large subunit ribosomal RNA gene partial sequence	KY817951.1 Aquilaria crassna voucher TP-27 small subunit ribosomal RNA gene partial sequence internal transcribed spacer 1 5.8S ribosomal RNA gene and internal transcribed spacer 2 complete sequence and large subunit ribosomal RNA gene partial sequence	0	0
KY817957.1 Aquilaria crassna voucher CS-6 small subunit ribosomal RNA gene partial sequence internal transcribed spacer 1 5.8S ribosomal RNA gene and internal transcribed spacer 2 complete sequence and large subunit ribosomal RNA gene partial sequence	KY817951.1 Aquilaria crassna voucher TP-27 small subunit ribosomal RNA gene partial sequence internal transcribed spacer 1 5.8S ribosomal RNA gene and internal transcribed spacer 2 complete sequence and large subunit ribosomal RNA gene partial sequence	0	0
KY817953.1 Aquilaria crassna voucher CS-2 small subunit ribosomal RNA gene partial sequence internal transcribed spacer 1 5.8S ribosomal RNA gene and internal transcribed spacer 2 complete sequence and large subunit ribosomal RNA gene partial sequence	KY817951.1 Aquilaria crassna voucher TP-27 small subunit ribosomal RNA gene partial sequence internal transcribed spacer 1 5.8S ribosomal RNA gene and internal transcribed spacer 2 complete sequence and large subunit ribosomal RNA gene partial sequence	0	0
MH134137.1 Aquilaria agallochum internal transcribed spacer 1 partial sequence 5.8S ribosomal RNA gene complete sequence and internal transcribed spacer 2 partial sequence_{aga}	KY817950.1 Aquilaria crassna voucher TP-20 small subunit ribosomal RNA gene partial sequence internal transcribed spacer 1 5.8S ribosomal RNA gene and internal transcribed spacer 2 complete sequence and large subunit ribosomal RNA gene partial sequence	0.0165072	0.0059524
KU879012.1 Aquilaria agallochum 18S ribosomal RNA gene partial sequence internal transcribed spacer 1 5.8S ribosomal RNA gene and internal transcribed spacer 2 complete sequence and 28S ribosomal RNA gene partial sequence_{aga}	KY817950.1 Aquilaria crassna voucher TP-20 small subunit ribosomal RNA gene partial sequence internal transcribed spacer 1 5.8S ribosomal RNA gene and internal transcribed spacer 2 complete sequence and large subunit ribosomal RNA gene partial sequence	0.0221253	0.00719082
MH134138.1 Aquilaria beccariana internal transcribed spacer 1 partial sequence 5.8S ribosomal RNA gene complete sequence and internal transcribed spacer 2 partial sequence_{aga}	KY817950.1 Aquilaria crassna voucher TP-20 small subunit ribosomal RNA gene partial sequence internal transcribed spacer 1 5.8S ribosomal RNA gene and internal transcribed spacer 2 complete sequence and large subunit ribosomal RNA gene partial sequence	0.0220708	0.00727399
KT779116.1 Aquilaria beccariana voucher FBL04001 internal transcribed spacer 1 partial sequence 5.8S ribosomal RNA gene complete sequence and internal transcribed spacer 2 partial sequence_{aga}	KY817950.1 Aquilaria crassna voucher TP-20 small subunit ribosomal RNA gene partial sequence internal transcribed spacer 1 5.8S ribosomal RNA gene and internal transcribed spacer 2 complete sequence and large subunit ribosomal RNA gene partial sequence	0.0421308	0.0101917
KT364477.1 Aquilaria beccariana voucher SFN29381 internal transcribed spacer 1 partial sequence 5.8S ribosomal RNA gene complete sequence and internal transcribed spacer 2 partial sequence_{aga}	KY817950.1 Aquilaria crassna voucher TP-20 small subunit ribosomal RNA gene partial sequence internal transcribed spacer 1 5.8S ribosomal RNA gene and internal transcribed spacer 2 complete sequence and large subunit ribosomal RNA gene partial sequence	0.0221534	0.00722737
KX351419.1 Aquilaria beccariana voucher S1 5.8S ribosomal RNA gene partial sequence internal transcribed spacer 2 complete sequence and large subunit ribosomal RNA gene partial sequence_{aga}	KY817950.1 Aquilaria crassna voucher TP-20 small subunit ribosomal RNA gene partial sequence internal transcribed spacer 1 5.8S ribosomal RNA gene and internal transcribed spacer 2 complete sequence and large subunit ribosomal RNA gene partial sequence	0	0
KX424704.1 Aquilaria beccariana 5.8S ribosomal RNA gene partial sequence internal transcribed spacer 2 complete sequence and 28S ribosomal RNA gene partial sequence_{aga}	KY817950.1 Aquilaria crassna voucher TP-20 small subunit ribosomal RNA gene partial sequence internal transcribed spacer 1 5.8S ribosomal RNA gene and internal transcribed spacer 2 complete sequence and large subunit ribosomal RNA gene partial sequence	0.0438711	0.011062
KU238038.1 Aquilaria crassna voucher FBL G11 WC3 internal transcribed spacer 2 partial sequence	KY817950.1 Aquilaria crassna voucher TP-20 small subunit ribosomal RNA gene partial sequence internal transcribed spacer 1 5.8S ribosomal RNA gene and internal transcribed spacer 2 complete sequence and large subunit ribosomal RNA gene partial sequence	0	0
MH134139.1 Aquilaria crassna internal transcribed spacer 1 partial sequence 5.8S ribosomal RNA gene complete sequence and internal transcribed spacer 2 partial sequence	KY817950.1 Aquilaria crassna voucher TP-20 small subunit ribosomal RNA gene partial sequence internal transcribed spacer 1 5.8S ribosomal RNA gene and internal transcribed spacer 2 complete sequence and large subunit ribosomal RNA gene partial sequence	0	0
KU244111.1 Aquilaria crassna voucher FBL01017 internal transcribed spacer 2 partial sequence	KY817950.1 Aquilaria crassna voucher TP-20 small subunit ribosomal RNA gene partial sequence internal transcribed spacer 1 5.8S ribosomal RNA gene and internal transcribed spacer 2 complete sequence and large subunit ribosomal RNA gene partial sequence	0	0
KU244110.1 Aquilaria crassna voucher FBL01014 internal transcribed spacer 2 partial sequence	KY817950.1 Aquilaria crassna voucher TP-20 small subunit ribosomal RNA gene partial sequence internal transcribed spacer 1 5.8S ribosomal RNA gene and internal transcribed spacer 2 complete sequence and large subunit ribosomal RNA gene partial sequence	0	0
KU244109.1 Aquilaria crassna voucher FBL01013 internal transcribed spacer 2 partial sequence	KY817950.1 Aquilaria crassna voucher TP-20 small subunit ribosomal RNA gene partial sequence internal transcribed spacer 1 5.8S ribosomal RNA gene and internal transcribed spacer 2 complete sequence and large subunit ribosomal RNA gene partial sequence	0	0
KU244108.1 Aquilaria crassna voucher FBL01012 internal transcribed spacer 2 partial sequence	KY817950.1 Aquilaria crassna voucher TP-20 small subunit ribosomal RNA gene partial sequence internal transcribed spacer 1 5.8S ribosomal RNA gene and internal transcribed spacer 2 complete sequence and large subunit ribosomal RNA gene partial sequence	0	0
KU238037.1 Aquilaria crassna voucher FBL G10 WC2 internal transcribed spacer 2 partial sequence	KY817950.1 Aquilaria crassna voucher TP-20 small subunit ribosomal RNA gene partial sequence internal transcribed spacer 1 5.8S ribosomal RNA gene and internal transcribed spacer 2 complete sequence and large subunit ribosomal RNA gene partial sequence	0.0027248	0.00273681
KU238035.1 Aquilaria crassna voucher FBL G04 WC1 internal transcribed spacer 2 partial sequence	KY817950.1 Aquilaria crassna voucher TP-20 small subunit ribosomal RNA gene partial sequence internal transcribed spacer 1 5.8S ribosomal RNA gene and internal transcribed spacer 2 complete sequence and large subunit ribosomal RNA gene partial sequence	0.0027248	0.00273681
KU244085.1 Aquilaria crassna voucher FBL01017 internal transcribed spacer 1 partial sequence 5.8S ribosomal RNA gene complete sequence and internal transcribed spacer 2 partial sequence	KY817950.1 Aquilaria crassna voucher TP-20 small subunit ribosomal RNA gene partial sequence internal transcribed spacer 1 5.8S ribosomal RNA gene and internal transcribed spacer 2 complete sequence and large subunit ribosomal RNA gene partial sequence	0	0
KU244084.1 Aquilaria crassna voucher FBL01014 internal transcribed spacer 1 partial sequence 5.8S ribosomal RNA gene complete sequence and internal transcribed spacer 2 partial sequence	KY817950.1 Aquilaria crassna voucher TP-20 small subunit ribosomal RNA gene partial sequence internal transcribed spacer 1 5.8S ribosomal RNA gene and internal transcribed spacer 2 complete sequence and large subunit ribosomal RNA gene partial sequence	0	0
KU244083.1 Aquilaria crassna voucher FBL01013 internal transcribed spacer 1 partial sequence 5.8S ribosomal RNA gene complete sequence and internal transcribed spacer 2 partial sequence_{cra}	KY817950.1 Aquilaria crassna voucher TP-20 small subunit ribosomal RNA gene partial sequence internal transcribed spacer 1 5.8S ribosomal RNA gene and internal transcribed spacer 2 complete sequence and large subunit ribosomal RNA gene partial sequence	0	0
KU244082.1 Aquilaria crassna voucher FBL01012 internal transcribed spacer 1 partial sequence 5.8S ribosomal RNA gene complete sequence and internal transcribed spacer 2 partial sequence	KY817950.1 Aquilaria crassna voucher TP-20 small subunit ribosomal RNA gene partial sequence internal transcribed spacer 1 5.8S ribosomal RNA gene and internal transcribed spacer 2 complete sequence and large subunit ribosomal RNA gene partial sequence	0	0
KT364478.1 Aquilaria crassna voucher FBL01012 internal transcribed spacer 1 partial sequence 5.8S ribosomal RNA gene complete sequence and internal transcribed spacer 2 partial sequence	KY817950.1 Aquilaria crassna voucher TP-20 small subunit ribosomal RNA gene partial sequence internal transcribed spacer 1 5.8S ribosomal RNA gene and internal transcribed spacer 2 complete sequence and large subunit ribosomal RNA gene partial sequence	0	0
KY817982.1 Aquilaria crassna voucher S-9 small subunit ribosomal RNA gene partial sequence internal transcribed spacer 1 5.8S ribosomal RNA gene and internal transcribed spacer 2 complete sequence and large subunit ribosomal RNA gene partial sequence	KY817950.1 Aquilaria crassna voucher TP-20 small subunit ribosomal RNA gene partial sequence internal transcribed spacer 1 5.8S ribosomal RNA gene and internal transcribed spacer 2 complete sequence and large subunit ribosomal RNA gene partial sequence	0	0
KY817979.1 Aquilaria crassna voucher S-1 small subunit ribosomal RNA gene partial sequence internal transcribed spacer 1 5.8S ribosomal RNA gene and internal transcribed spacer 2 complete sequence and large subunit ribosomal RNA gene partial sequence	KY817950.1 Aquilaria crassna voucher TP-20 small subunit ribosomal RNA gene partial sequence internal transcribed spacer 1 5.8S ribosomal RNA gene and internal transcribed spacer 2 complete sequence and large subunit ribosomal RNA gene partial sequence	0	0
KY817973.1 Aquilaria crassna voucher ML-9 small subunit ribosomal RNA gene partial sequence internal transcribed spacer 1 5.8S ribosomal RNA gene and internal transcribed spacer 2 complete sequence and large subunit ribosomal RNA gene partial sequence	KY817950.1 Aquilaria crassna voucher TP-20 small subunit ribosomal RNA gene partial sequence internal transcribed spacer 1 5.8S ribosomal RNA gene and internal transcribed spacer 2 complete sequence and large subunit ribosomal RNA gene partial sequence	0	0
KY817972.1 Aquilaria crassna voucher ML-8 small subunit ribosomal RNA gene partial sequence internal transcribed spacer 1 5.8S ribosomal RNA gene and internal transcribed spacer 2 complete sequence and large subunit ribosomal RNA gene partial sequence	KY817950.1 Aquilaria crassna voucher TP-20 small subunit ribosomal RNA gene partial sequence internal transcribed spacer 1 5.8S ribosomal RNA gene and internal transcribed spacer 2 complete sequence and large subunit ribosomal RNA gene partial sequence	0	0
KY817971.1 Aquilaria crassna voucher ML-7 small subunit ribosomal RNA gene partial sequence internal transcribed spacer 1 5.8S ribosomal RNA gene and internal transcribed spacer 2 complete sequence and large subunit ribosomal RNA gene partial sequence	KY817950.1 Aquilaria crassna voucher TP-20 small subunit ribosomal RNA gene partial sequence internal transcribed spacer 1 5.8S ribosomal RNA gene and internal transcribed spacer 2 complete sequence and large subunit ribosomal RNA gene partial sequence	0	0
KY817970.1 Aquilaria crassna voucher ML-6 small subunit ribosomal RNA gene partial sequence internal transcribed spacer 1 5.8S ribosomal RNA gene and internal transcribed spacer 2 complete sequence and large subunit ribosomal RNA gene partial sequence	KY817950.1 Aquilaria crassna voucher TP-20 small subunit ribosomal RNA gene partial sequence internal transcribed spacer 1 5.8S ribosomal RNA gene and internal transcribed spacer 2 complete sequence and large subunit ribosomal RNA gene partial sequence	0	0
KY817969.1 Aquilaria crassna voucher ML-5 small subunit ribosomal RNA gene partial sequence internal transcribed spacer 1 5.8S ribosomal RNA gene and internal transcribed spacer 2 complete sequence and large subunit ribosomal RNA gene partial sequence	KY817950.1 Aquilaria crassna voucher TP-20 small subunit ribosomal RNA gene partial sequence internal transcribed spacer 1 5.8S ribosomal RNA gene and internal transcribed spacer 2 complete sequence and large subunit ribosomal RNA gene partial sequence	0	0
KY817968.1 Aquilaria crassna voucher ML-4 small subunit ribosomal RNA gene partial sequence internal transcribed spacer 1 5.8S ribosomal RNA gene and internal transcribed spacer 2 complete sequence and large subunit ribosomal RNA gene partial sequence	KY817950.1 Aquilaria crassna voucher TP-20 small subunit ribosomal RNA gene partial sequence internal transcribed spacer 1 5.8S ribosomal RNA gene and internal transcribed spacer 2 complete sequence and large subunit ribosomal RNA gene partial sequence	0	0
KY817967.1 Aquilaria crassna voucher ML-3 small subunit ribosomal RNA gene partial sequence internal transcribed spacer 1 5.8S ribosomal RNA gene and internal transcribed spacer 2 complete sequence and large subunit ribosomal RNA gene partial sequence	KY817950.1 Aquilaria crassna voucher TP-20 small subunit ribosomal RNA gene partial sequence internal transcribed spacer 1 5.8S ribosomal RNA gene and internal transcribed spacer 2 complete sequence and large subunit ribosomal RNA gene partial sequence	0	0
KY817964.1 Aquilaria crassna voucher CS-13 small subunit ribosomal RNA gene partial sequence internal transcribed spacer 1 5.8S ribosomal RNA gene and internal transcribed spacer 2 complete sequence and large subunit ribosomal RNA gene partial sequence	KY817950.1 Aquilaria crassna voucher TP-20 small subunit ribosomal RNA gene partial sequence internal transcribed spacer 1 5.8S ribosomal RNA gene and internal transcribed spacer 2 complete sequence and large subunit ribosomal RNA gene partial sequence	0	0
KY817963.1 Aquilaria crassna voucher CS-12 small subunit ribosomal RNA gene partial sequence internal transcribed spacer 1 5.8S ribosomal RNA gene and internal transcribed spacer 2 complete sequence and large subunit ribosomal RNA gene partial sequence	KY817950.1 Aquilaria crassna voucher TP-20 small subunit ribosomal RNA gene partial sequence internal transcribed spacer 1 5.8S ribosomal RNA gene and internal transcribed spacer 2 complete sequence and large subunit ribosomal RNA gene partial sequence	0	0
KY817962.1 Aquilaria crassna voucher CS-11 small subunit ribosomal RNA gene partial sequence internal transcribed spacer 1 5.8S ribosomal RNA gene and internal transcribed spacer 2 complete sequence and large subunit ribosomal RNA gene partial sequence	KY817950.1 Aquilaria crassna voucher TP-20 small subunit ribosomal RNA gene partial sequence internal transcribed spacer 1 5.8S ribosomal RNA gene and internal transcribed spacer 2 complete sequence and large subunit ribosomal RNA gene partial sequence	0	0
KY817961.1 Aquilaria crassna voucher CS-10 small subunit ribosomal RNA gene partial sequence internal transcribed spacer 1 5.8S ribosomal RNA gene and internal transcribed spacer 2 complete sequence and large subunit ribosomal RNA gene partial sequence	KY817950.1 Aquilaria crassna voucher TP-20 small subunit ribosomal RNA gene partial sequence internal transcribed spacer 1 5.8S ribosomal RNA gene and internal transcribed spacer 2 complete sequence and large subunit ribosomal RNA gene partial sequence	0	0
KY817959.1 Aquilaria crassna voucher CS-8 small subunit ribosomal RNA gene partial sequence internal transcribed spacer 1 5.8S ribosomal RNA gene and internal transcribed spacer 2 complete sequence and large subunit ribosomal RNA gene partial sequence	KY817950.1 Aquilaria crassna voucher TP-20 small subunit ribosomal RNA gene partial sequence internal transcribed spacer 1 5.8S ribosomal RNA gene and internal transcribed spacer 2 complete sequence and large subunit ribosomal RNA gene partial sequence	0	0
KY817958.1 Aquilaria crassna voucher CS-7 small subunit ribosomal RNA gene partial sequence internal transcribed spacer 1 5.8S ribosomal RNA gene and internal transcribed spacer 2 complete sequence and large subunit ribosomal RNA gene partial sequence	KY817950.1 Aquilaria crassna voucher TP-20 small subunit ribosomal RNA gene partial sequence internal transcribed spacer 1 5.8S ribosomal RNA gene and internal transcribed spacer 2 complete sequence and large subunit ribosomal RNA gene partial sequence	0	0
KY817957.1 Aquilaria crassna voucher CS-6 small subunit ribosomal RNA gene partial sequence internal transcribed spacer 1 5.8S ribosomal RNA gene and internal transcribed spacer 2 complete sequence and large subunit ribosomal RNA gene partial sequence	KY817950.1 Aquilaria crassna voucher TP-20 small subunit ribosomal RNA gene partial sequence internal transcribed spacer 1 5.8S ribosomal RNA gene and internal transcribed spacer 2 complete sequence and large subunit ribosomal RNA gene partial sequence	0	0
KY817953.1 Aquilaria crassna voucher CS-2 small subunit ribosomal RNA gene partial sequence internal transcribed spacer 1 5.8S ribosomal RNA gene and internal transcribed spacer 2 complete sequence and large subunit ribosomal RNA gene partial sequence	KY817950.1 Aquilaria crassna voucher TP-20 small subunit ribosomal RNA gene partial sequence internal transcribed spacer 1 5.8S ribosomal RNA gene and internal transcribed spacer 2 complete sequence and large subunit ribosomal RNA gene partial sequence	0	0
KY817951.1 Aquilaria crassna voucher TP-27 small subunit ribosomal RNA gene partial sequence internal transcribed spacer 1 5.8S ribosomal RNA gene and internal transcribed spacer 2 complete sequence and large subunit ribosomal RNA gene partial sequence	KY817950.1 Aquilaria crassna voucher TP-20 small subunit ribosomal RNA gene partial sequence internal transcribed spacer 1 5.8S ribosomal RNA gene and internal transcribed spacer 2 complete sequence and large subunit ribosomal RNA gene partial sequence	0	0
MH134137.1 Aquilaria agallochum internal transcribed spacer 1 partial sequence 5.8S ribosomal RNA gene complete sequence and internal transcribed spacer 2 partial sequence_{aga}	KY817949.1 Aquilaria crassna voucher TP-19 small subunit ribosomal RNA gene partial sequence internal transcribed spacer 1 5.8S ribosomal RNA gene and internal transcribed spacer 2 complete sequence and large subunit ribosomal RNA gene partial sequence	0.0165072	0.0059524
KU879012.1 Aquilaria agallochum 18S ribosomal RNA gene partial sequence internal transcribed spacer 1 5.8S ribosomal RNA gene and internal transcribed spacer 2 complete sequence and 28S ribosomal RNA gene partial sequence_{aga}	KY817949.1 Aquilaria crassna voucher TP-19 small subunit ribosomal RNA gene partial sequence internal transcribed spacer 1 5.8S ribosomal RNA gene and internal transcribed spacer 2 complete sequence and large subunit ribosomal RNA gene partial sequence	0.0221253	0.00719082
MH134138.1 Aquilaria beccariana internal transcribed spacer 1 partial sequence 5.8S ribosomal RNA gene complete sequence and internal transcribed spacer 2 partial sequence_{aga}	KY817949.1 Aquilaria crassna voucher TP-19 small subunit ribosomal RNA gene partial sequence internal transcribed spacer 1 5.8S ribosomal RNA gene and internal transcribed spacer 2 complete sequence and large subunit ribosomal RNA gene partial sequence	0.0220708	0.00727399
KT779116.1 Aquilaria beccariana voucher FBL04001 internal transcribed spacer 1 partial sequence 5.8S ribosomal RNA gene complete sequence and internal transcribed spacer 2 partial sequence_{aga}	KY817949.1 Aquilaria crassna voucher TP-19 small subunit ribosomal RNA gene partial sequence internal transcribed spacer 1 5.8S ribosomal RNA gene and internal transcribed spacer 2 complete sequence and large subunit ribosomal RNA gene partial sequence	0.0421308	0.0101917
KT364477.1 Aquilaria beccariana voucher SFN29381 internal transcribed spacer 1 partial sequence 5.8S ribosomal RNA gene complete sequence and internal transcribed spacer 2 partial sequence_{aga}	KY817949.1 Aquilaria crassna voucher TP-19 small subunit ribosomal RNA gene partial sequence internal transcribed spacer 1 5.8S ribosomal RNA gene and internal transcribed spacer 2 complete sequence and large subunit ribosomal RNA gene partial sequence	0.0221534	0.00722737
KX351419.1 Aquilaria beccariana voucher S1 5.8S ribosomal RNA gene partial sequence internal transcribed spacer 2 complete sequence and large subunit ribosomal RNA gene partial sequence_{aga}	KY817949.1 Aquilaria crassna voucher TP-19 small subunit ribosomal RNA gene partial sequence internal transcribed spacer 1 5.8S ribosomal RNA gene and internal transcribed spacer 2 complete sequence and large subunit ribosomal RNA gene partial sequence	0	0
KX424704.1 Aquilaria beccariana 5.8S ribosomal RNA gene partial sequence internal transcribed spacer 2 complete sequence and 28S ribosomal RNA gene partial sequence_{aga}	KY817949.1 Aquilaria crassna voucher TP-19 small subunit ribosomal RNA gene partial sequence internal transcribed spacer 1 5.8S ribosomal RNA gene and internal transcribed spacer 2 complete sequence and large subunit ribosomal RNA gene partial sequence	0.0438711	0.011062
KU238038.1 Aquilaria crassna voucher FBL G11 WC3 internal transcribed spacer 2 partial sequence	KY817949.1 Aquilaria crassna voucher TP-19 small subunit ribosomal RNA gene partial sequence internal transcribed spacer 1 5.8S ribosomal RNA gene and internal transcribed spacer 2 complete sequence and large subunit ribosomal RNA gene partial sequence	0	0
MH134139.1 Aquilaria crassna internal transcribed spacer 1 partial sequence 5.8S ribosomal RNA gene complete sequence and internal transcribed spacer 2 partial sequence	KY817949.1 Aquilaria crassna voucher TP-19 small subunit ribosomal RNA gene partial sequence internal transcribed spacer 1 5.8S ribosomal RNA gene and internal transcribed spacer 2 complete sequence and large subunit ribosomal RNA gene partial sequence	0	0
KU244111.1 Aquilaria crassna voucher FBL01017 internal transcribed spacer 2 partial sequence	KY817949.1 Aquilaria crassna voucher TP-19 small subunit ribosomal RNA gene partial sequence internal transcribed spacer 1 5.8S ribosomal RNA gene and internal transcribed spacer 2 complete sequence and large subunit ribosomal RNA gene partial sequence	0	0
KU244110.1 Aquilaria crassna voucher FBL01014 internal transcribed spacer 2 partial sequence	KY817949.1 Aquilaria crassna voucher TP-19 small subunit ribosomal RNA gene partial sequence internal transcribed spacer 1 5.8S ribosomal RNA gene and internal transcribed spacer 2 complete sequence and large subunit ribosomal RNA gene partial sequence	0	0
KU244109.1 Aquilaria crassna voucher FBL01013 internal transcribed spacer 2 partial sequence	KY817949.1 Aquilaria crassna voucher TP-19 small subunit ribosomal RNA gene partial sequence internal transcribed spacer 1 5.8S ribosomal RNA gene and internal transcribed spacer 2 complete sequence and large subunit ribosomal RNA gene partial sequence	0	0
KU244108.1 Aquilaria crassna voucher FBL01012 internal transcribed spacer 2 partial sequence	KY817949.1 Aquilaria crassna voucher TP-19 small subunit ribosomal RNA gene partial sequence internal transcribed spacer 1 5.8S ribosomal RNA gene and internal transcribed spacer 2 complete sequence and large subunit ribosomal RNA gene partial sequence	0	0
KU238037.1 Aquilaria crassna voucher FBL G10 WC2 internal transcribed spacer 2 partial sequence	KY817949.1 Aquilaria crassna voucher TP-19 small subunit ribosomal RNA gene partial sequence internal transcribed spacer 1 5.8S ribosomal RNA gene and internal transcribed spacer 2 complete sequence and large subunit ribosomal RNA gene partial sequence	0.0027248	0.00273681
KU238035.1 Aquilaria crassna voucher FBL G04 WC1 internal transcribed spacer 2 partial sequence	KY817949.1 Aquilaria crassna voucher TP-19 small subunit ribosomal RNA gene partial sequence internal transcribed spacer 1 5.8S ribosomal RNA gene and internal transcribed spacer 2 complete sequence and large subunit ribosomal RNA gene partial sequence	0.0027248	0.00273681
KU244085.1 Aquilaria crassna voucher FBL01017 internal transcribed spacer 1 partial sequence 5.8S ribosomal RNA gene complete sequence and internal transcribed spacer 2 partial sequence	KY817949.1 Aquilaria crassna voucher TP-19 small subunit ribosomal RNA gene partial sequence internal transcribed spacer 1 5.8S ribosomal RNA gene and internal transcribed spacer 2 complete sequence and large subunit ribosomal RNA gene partial sequence	0	0
KU244084.1 Aquilaria crassna voucher FBL01014 internal transcribed spacer 1 partial sequence 5.8S ribosomal RNA gene complete sequence and internal transcribed spacer 2 partial sequence	KY817949.1 Aquilaria crassna voucher TP-19 small subunit ribosomal RNA gene partial sequence internal transcribed spacer 1 5.8S ribosomal RNA gene and internal transcribed spacer 2 complete sequence and large subunit ribosomal RNA gene partial sequence	0	0
KU244083.1 Aquilaria crassna voucher FBL01013 internal transcribed spacer 1 partial sequence 5.8S ribosomal RNA gene complete sequence and internal transcribed spacer 2 partial sequence_{cra}	KY817949.1 Aquilaria crassna voucher TP-19 small subunit ribosomal RNA gene partial sequence internal transcribed spacer 1 5.8S ribosomal RNA gene and internal transcribed spacer 2 complete sequence and large subunit ribosomal RNA gene partial sequence	0	0
KU244082.1 Aquilaria crassna voucher FBL01012 internal transcribed spacer 1 partial sequence 5.8S ribosomal RNA gene complete sequence and internal transcribed spacer 2 partial sequence	KY817949.1 Aquilaria crassna voucher TP-19 small subunit ribosomal RNA gene partial sequence internal transcribed spacer 1 5.8S ribosomal RNA gene and internal transcribed spacer 2 complete sequence and large subunit ribosomal RNA gene partial sequence	0	0
KT364478.1 Aquilaria crassna voucher FBL01012 internal transcribed spacer 1 partial sequence 5.8S ribosomal RNA gene complete sequence and internal transcribed spacer 2 partial sequence	KY817949.1 Aquilaria crassna voucher TP-19 small subunit ribosomal RNA gene partial sequence internal transcribed spacer 1 5.8S ribosomal RNA gene and internal transcribed spacer 2 complete sequence and large subunit ribosomal RNA gene partial sequence	0	0
KY817982.1 Aquilaria crassna voucher S-9 small subunit ribosomal RNA gene partial sequence internal transcribed spacer 1 5.8S ribosomal RNA gene and internal transcribed spacer 2 complete sequence and large subunit ribosomal RNA gene partial sequence	KY817949.1 Aquilaria crassna voucher TP-19 small subunit ribosomal RNA gene partial sequence internal transcribed spacer 1 5.8S ribosomal RNA gene and internal transcribed spacer 2 complete sequence and large subunit ribosomal RNA gene partial sequence	0	0
KY817979.1 Aquilaria crassna voucher S-1 small subunit ribosomal RNA gene partial sequence internal transcribed spacer 1 5.8S ribosomal RNA gene and internal transcribed spacer 2 complete sequence and large subunit ribosomal RNA gene partial sequence	KY817949.1 Aquilaria crassna voucher TP-19 small subunit ribosomal RNA gene partial sequence internal transcribed spacer 1 5.8S ribosomal RNA gene and internal transcribed spacer 2 complete sequence and large subunit ribosomal RNA gene partial sequence	0	0
KY817973.1 Aquilaria crassna voucher ML-9 small subunit ribosomal RNA gene partial sequence internal transcribed spacer 1 5.8S ribosomal RNA gene and internal transcribed spacer 2 complete sequence and large subunit ribosomal RNA gene partial sequence	KY817949.1 Aquilaria crassna voucher TP-19 small subunit ribosomal RNA gene partial sequence internal transcribed spacer 1 5.8S ribosomal RNA gene and internal transcribed spacer 2 complete sequence and large subunit ribosomal RNA gene partial sequence	0	0
KY817972.1 Aquilaria crassna voucher ML-8 small subunit ribosomal RNA gene partial sequence internal transcribed spacer 1 5.8S ribosomal RNA gene and internal transcribed spacer 2 complete sequence and large subunit ribosomal RNA gene partial sequence	KY817949.1 Aquilaria crassna voucher TP-19 small subunit ribosomal RNA gene partial sequence internal transcribed spacer 1 5.8S ribosomal RNA gene and internal transcribed spacer 2 complete sequence and large subunit ribosomal RNA gene partial sequence	0	0
KY817971.1 Aquilaria crassna voucher ML-7 small subunit ribosomal RNA gene partial sequence internal transcribed spacer 1 5.8S ribosomal RNA gene and internal transcribed spacer 2 complete sequence and large subunit ribosomal RNA gene partial sequence	KY817949.1 Aquilaria crassna voucher TP-19 small subunit ribosomal RNA gene partial sequence internal transcribed spacer 1 5.8S ribosomal RNA gene and internal transcribed spacer 2 complete sequence and large subunit ribosomal RNA gene partial sequence	0	0
KY817970.1 Aquilaria crassna voucher ML-6 small subunit ribosomal RNA gene partial sequence internal transcribed spacer 1 5.8S ribosomal RNA gene and internal transcribed spacer 2 complete sequence and large subunit ribosomal RNA gene partial sequence	KY817949.1 Aquilaria crassna voucher TP-19 small subunit ribosomal RNA gene partial sequence internal transcribed spacer 1 5.8S ribosomal RNA gene and internal transcribed spacer 2 complete sequence and large subunit ribosomal RNA gene partial sequence	0	0
KY817969.1 Aquilaria crassna voucher ML-5 small subunit ribosomal RNA gene partial sequence internal transcribed spacer 1 5.8S ribosomal RNA gene and internal transcribed spacer 2 complete sequence and large subunit ribosomal RNA gene partial sequence	KY817949.1 Aquilaria crassna voucher TP-19 small subunit ribosomal RNA gene partial sequence internal transcribed spacer 1 5.8S ribosomal RNA gene and internal transcribed spacer 2 complete sequence and large subunit ribosomal RNA gene partial sequence	0	0
KY817968.1 Aquilaria crassna voucher ML-4 small subunit ribosomal RNA gene partial sequence internal transcribed spacer 1 5.8S ribosomal RNA gene and internal transcribed spacer 2 complete sequence and large subunit ribosomal RNA gene partial sequence	KY817949.1 Aquilaria crassna voucher TP-19 small subunit ribosomal RNA gene partial sequence internal transcribed spacer 1 5.8S ribosomal RNA gene and internal transcribed spacer 2 complete sequence and large subunit ribosomal RNA gene partial sequence	0	0
KY817967.1 Aquilaria crassna voucher ML-3 small subunit ribosomal RNA gene partial sequence internal transcribed spacer 1 5.8S ribosomal RNA gene and internal transcribed spacer 2 complete sequence and large subunit ribosomal RNA gene partial sequence	KY817949.1 Aquilaria crassna voucher TP-19 small subunit ribosomal RNA gene partial sequence internal transcribed spacer 1 5.8S ribosomal RNA gene and internal transcribed spacer 2 complete sequence and large subunit ribosomal RNA gene partial sequence	0	0
KY817964.1 Aquilaria crassna voucher CS-13 small subunit ribosomal RNA gene partial sequence internal transcribed spacer 1 5.8S ribosomal RNA gene and internal transcribed spacer 2 complete sequence and large subunit ribosomal RNA gene partial sequence	KY817949.1 Aquilaria crassna voucher TP-19 small subunit ribosomal RNA gene partial sequence internal transcribed spacer 1 5.8S ribosomal RNA gene and internal transcribed spacer 2 complete sequence and large subunit ribosomal RNA gene partial sequence	0	0
KY817963.1 Aquilaria crassna voucher CS-12 small subunit ribosomal RNA gene partial sequence internal transcribed spacer 1 5.8S ribosomal RNA gene and internal transcribed spacer 2 complete sequence and large subunit ribosomal RNA gene partial sequence	KY817949.1 Aquilaria crassna voucher TP-19 small subunit ribosomal RNA gene partial sequence internal transcribed spacer 1 5.8S ribosomal RNA gene and internal transcribed spacer 2 complete sequence and large subunit ribosomal RNA gene partial sequence	0	0
KY817962.1 Aquilaria crassna voucher CS-11 small subunit ribosomal RNA gene partial sequence internal transcribed spacer 1 5.8S ribosomal RNA gene and internal transcribed spacer 2 complete sequence and large subunit ribosomal RNA gene partial sequence	KY817949.1 Aquilaria crassna voucher TP-19 small subunit ribosomal RNA gene partial sequence internal transcribed spacer 1 5.8S ribosomal RNA gene and internal transcribed spacer 2 complete sequence and large subunit ribosomal RNA gene partial sequence	0	0
KY817961.1 Aquilaria crassna voucher CS-10 small subunit ribosomal RNA gene partial sequence internal transcribed spacer 1 5.8S ribosomal RNA gene and internal transcribed spacer 2 complete sequence and large subunit ribosomal RNA gene partial sequence	KY817949.1 Aquilaria crassna voucher TP-19 small subunit ribosomal RNA gene partial sequence internal transcribed spacer 1 5.8S ribosomal RNA gene and internal transcribed spacer 2 complete sequence and large subunit ribosomal RNA gene partial sequence	0	0
KY817959.1 Aquilaria crassna voucher CS-8 small subunit ribosomal RNA gene partial sequence internal transcribed spacer 1 5.8S ribosomal RNA gene and internal transcribed spacer 2 complete sequence and large subunit ribosomal RNA gene partial sequence	KY817949.1 Aquilaria crassna voucher TP-19 small subunit ribosomal RNA gene partial sequence internal transcribed spacer 1 5.8S ribosomal RNA gene and internal transcribed spacer 2 complete sequence and large subunit ribosomal RNA gene partial sequence	0	0
KY817958.1 Aquilaria crassna voucher CS-7 small subunit ribosomal RNA gene partial sequence internal transcribed spacer 1 5.8S ribosomal RNA gene and internal transcribed spacer 2 complete sequence and large subunit ribosomal RNA gene partial sequence	KY817949.1 Aquilaria crassna voucher TP-19 small subunit ribosomal RNA gene partial sequence internal transcribed spacer 1 5.8S ribosomal RNA gene and internal transcribed spacer 2 complete sequence and large subunit ribosomal RNA gene partial sequence	0	0
KY817957.1 Aquilaria crassna voucher CS-6 small subunit ribosomal RNA gene partial sequence internal transcribed spacer 1 5.8S ribosomal RNA gene and internal transcribed spacer 2 complete sequence and large subunit ribosomal RNA gene partial sequence	KY817949.1 Aquilaria crassna voucher TP-19 small subunit ribosomal RNA gene partial sequence internal transcribed spacer 1 5.8S ribosomal RNA gene and internal transcribed spacer 2 complete sequence and large subunit ribosomal RNA gene partial sequence	0	0
KY817953.1 Aquilaria crassna voucher CS-2 small subunit ribosomal RNA gene partial sequence internal transcribed spacer 1 5.8S ribosomal RNA gene and internal transcribed spacer 2 complete sequence and large subunit ribosomal RNA gene partial sequence	KY817949.1 Aquilaria crassna voucher TP-19 small subunit ribosomal RNA gene partial sequence internal transcribed spacer 1 5.8S ribosomal RNA gene and internal transcribed spacer 2 complete sequence and large subunit ribosomal RNA gene partial sequence	0	0
KY817951.1 Aquilaria crassna voucher TP-27 small subunit ribosomal RNA gene partial sequence internal transcribed spacer 1 5.8S ribosomal RNA gene and internal transcribed spacer 2 complete sequence and large subunit ribosomal RNA gene partial sequence	KY817949.1 Aquilaria crassna voucher TP-19 small subunit ribosomal RNA gene partial sequence internal transcribed spacer 1 5.8S ribosomal RNA gene and internal transcribed spacer 2 complete sequence and large subunit ribosomal RNA gene partial sequence	0	0
KY817950.1 Aquilaria crassna voucher TP-20 small subunit ribosomal RNA gene partial sequence internal transcribed spacer 1 5.8S ribosomal RNA gene and internal transcribed spacer 2 complete sequence and large subunit ribosomal RNA gene partial sequence	KY817949.1 Aquilaria crassna voucher TP-19 small subunit ribosomal RNA gene partial sequence internal transcribed spacer 1 5.8S ribosomal RNA gene and internal transcribed spacer 2 complete sequence and large subunit ribosomal RNA gene partial sequence	0	0
MH134137.1 Aquilaria agallochum internal transcribed spacer 1 partial sequence 5.8S ribosomal RNA gene complete sequence and internal transcribed spacer 2 partial sequence_{aga}	KY817948.1 Aquilaria crassna voucher TP-15 small subunit ribosomal RNA gene partial sequence internal transcribed spacer 1 5.8S ribosomal RNA gene and internal transcribed spacer 2 complete sequence and large subunit ribosomal RNA gene partial sequence	0.0165072	0.0059524
KU879012.1 Aquilaria agallochum 18S ribosomal RNA gene partial sequence internal transcribed spacer 1 5.8S ribosomal RNA gene and internal transcribed spacer 2 complete sequence and 28S ribosomal RNA gene partial sequence_{aga}	KY817948.1 Aquilaria crassna voucher TP-15 small subunit ribosomal RNA gene partial sequence internal transcribed spacer 1 5.8S ribosomal RNA gene and internal transcribed spacer 2 complete sequence and large subunit ribosomal RNA gene partial sequence	0.0221253	0.00719082
MH134138.1 Aquilaria beccariana internal transcribed spacer 1 partial sequence 5.8S ribosomal RNA gene complete sequence and internal transcribed spacer 2 partial sequence_{aga}	KY817948.1 Aquilaria crassna voucher TP-15 small subunit ribosomal RNA gene partial sequence internal transcribed spacer 1 5.8S ribosomal RNA gene and internal transcribed spacer 2 complete sequence and large subunit ribosomal RNA gene partial sequence	0.0220708	0.00727399
KT779116.1 Aquilaria beccariana voucher FBL04001 internal transcribed spacer 1 partial sequence 5.8S ribosomal RNA gene complete sequence and internal transcribed spacer 2 partial sequence_{aga}	KY817948.1 Aquilaria crassna voucher TP-15 small subunit ribosomal RNA gene partial sequence internal transcribed spacer 1 5.8S ribosomal RNA gene and internal transcribed spacer 2 complete sequence and large subunit ribosomal RNA gene partial sequence	0.0421308	0.0101917
KT364477.1 Aquilaria beccariana voucher SFN29381 internal transcribed spacer 1 partial sequence 5.8S ribosomal RNA gene complete sequence and internal transcribed spacer 2 partial sequence_{aga}	KY817948.1 Aquilaria crassna voucher TP-15 small subunit ribosomal RNA gene partial sequence internal transcribed spacer 1 5.8S ribosomal RNA gene and internal transcribed spacer 2 complete sequence and large subunit ribosomal RNA gene partial sequence	0.0221534	0.00722737
KX351419.1 Aquilaria beccariana voucher S1 5.8S ribosomal RNA gene partial sequence internal transcribed spacer 2 complete sequence and large subunit ribosomal RNA gene partial sequence_{aga}	KY817948.1 Aquilaria crassna voucher TP-15 small subunit ribosomal RNA gene partial sequence internal transcribed spacer 1 5.8S ribosomal RNA gene and internal transcribed spacer 2 complete sequence and large subunit ribosomal RNA gene partial sequence	0	0
KX424704.1 Aquilaria beccariana 5.8S ribosomal RNA gene partial sequence internal transcribed spacer 2 complete sequence and 28S ribosomal RNA gene partial sequence_{aga}	KY817948.1 Aquilaria crassna voucher TP-15 small subunit ribosomal RNA gene partial sequence internal transcribed spacer 1 5.8S ribosomal RNA gene and internal transcribed spacer 2 complete sequence and large subunit ribosomal RNA gene partial sequence	0.0438711	0.011062
KU238038.1 Aquilaria crassna voucher FBL G11 WC3 internal transcribed spacer 2 partial sequence	KY817948.1 Aquilaria crassna voucher TP-15 small subunit ribosomal RNA gene partial sequence internal transcribed spacer 1 5.8S ribosomal RNA gene and internal transcribed spacer 2 complete sequence and large subunit ribosomal RNA gene partial sequence	0	0
MH134139.1 Aquilaria crassna internal transcribed spacer 1 partial sequence 5.8S ribosomal RNA gene complete sequence and internal transcribed spacer 2 partial sequence	KY817948.1 Aquilaria crassna voucher TP-15 small subunit ribosomal RNA gene partial sequence internal transcribed spacer 1 5.8S ribosomal RNA gene and internal transcribed spacer 2 complete sequence and large subunit ribosomal RNA gene partial sequence	0	0
KU244111.1 Aquilaria crassna voucher FBL01017 internal transcribed spacer 2 partial sequence	KY817948.1 Aquilaria crassna voucher TP-15 small subunit ribosomal RNA gene partial sequence internal transcribed spacer 1 5.8S ribosomal RNA gene and internal transcribed spacer 2 complete sequence and large subunit ribosomal RNA gene partial sequence	0	0
KU244110.1 Aquilaria crassna voucher FBL01014 internal transcribed spacer 2 partial sequence	KY817948.1 Aquilaria crassna voucher TP-15 small subunit ribosomal RNA gene partial sequence internal transcribed spacer 1 5.8S ribosomal RNA gene and internal transcribed spacer 2 complete sequence and large subunit ribosomal RNA gene partial sequence	0	0
KU244109.1 Aquilaria crassna voucher FBL01013 internal transcribed spacer 2 partial sequence	KY817948.1 Aquilaria crassna voucher TP-15 small subunit ribosomal RNA gene partial sequence internal transcribed spacer 1 5.8S ribosomal RNA gene and internal transcribed spacer 2 complete sequence and large subunit ribosomal RNA gene partial sequence	0	0
KU244108.1 Aquilaria crassna voucher FBL01012 internal transcribed spacer 2 partial sequence	KY817948.1 Aquilaria crassna voucher TP-15 small subunit ribosomal RNA gene partial sequence internal transcribed spacer 1 5.8S ribosomal RNA gene and internal transcribed spacer 2 complete sequence and large subunit ribosomal RNA gene partial sequence	0	0
KU238037.1 Aquilaria crassna voucher FBL G10 WC2 internal transcribed spacer 2 partial sequence	KY817948.1 Aquilaria crassna voucher TP-15 small subunit ribosomal RNA gene partial sequence internal transcribed spacer 1 5.8S ribosomal RNA gene and internal transcribed spacer 2 complete sequence and large subunit ribosomal RNA gene partial sequence	0.0027248	0.00273681
KU238035.1 Aquilaria crassna voucher FBL G04 WC1 internal transcribed spacer 2 partial sequence	KY817948.1 Aquilaria crassna voucher TP-15 small subunit ribosomal RNA gene partial sequence internal transcribed spacer 1 5.8S ribosomal RNA gene and internal transcribed spacer 2 complete sequence and large subunit ribosomal RNA gene partial sequence	0.0027248	0.00273681
KU244085.1 Aquilaria crassna voucher FBL01017 internal transcribed spacer 1 partial sequence 5.8S ribosomal RNA gene complete sequence and internal transcribed spacer 2 partial sequence	KY817948.1 Aquilaria crassna voucher TP-15 small subunit ribosomal RNA gene partial sequence internal transcribed spacer 1 5.8S ribosomal RNA gene and internal transcribed spacer 2 complete sequence and large subunit ribosomal RNA gene partial sequence	0	0
KU244084.1 Aquilaria crassna voucher FBL01014 internal transcribed spacer 1 partial sequence 5.8S ribosomal RNA gene complete sequence and internal transcribed spacer 2 partial sequence	KY817948.1 Aquilaria crassna voucher TP-15 small subunit ribosomal RNA gene partial sequence internal transcribed spacer 1 5.8S ribosomal RNA gene and internal transcribed spacer 2 complete sequence and large subunit ribosomal RNA gene partial sequence	0	0
KU244083.1 Aquilaria crassna voucher FBL01013 internal transcribed spacer 1 partial sequence 5.8S ribosomal RNA gene complete sequence and internal transcribed spacer 2 partial sequence_{cra}	KY817948.1 Aquilaria crassna voucher TP-15 small subunit ribosomal RNA gene partial sequence internal transcribed spacer 1 5.8S ribosomal RNA gene and internal transcribed spacer 2 complete sequence and large subunit ribosomal RNA gene partial sequence	0	0
KU244082.1 Aquilaria crassna voucher FBL01012 internal transcribed spacer 1 partial sequence 5.8S ribosomal RNA gene complete sequence and internal transcribed spacer 2 partial sequence	KY817948.1 Aquilaria crassna voucher TP-15 small subunit ribosomal RNA gene partial sequence internal transcribed spacer 1 5.8S ribosomal RNA gene and internal transcribed spacer 2 complete sequence and large subunit ribosomal RNA gene partial sequence	0	0
[truncated: 10,982 more rows]

## Sheet: Table S7
Table S7. Genetic distance calculation results based on matK DNA molecular markers among different Aquilaria species.
Species 1	Species 2	Genetic distance	Std. Err
[truncated: 3,486 more rows]

## Sheet: Table S8
Table S8. Genetic distance calculation results based on rbcL DNA molecular markers among different Aquilaria species.
[truncated: 3,322 more rows]

[truncated: 4 more sheets: Table S9, Table S10, Table S11, Table S12]
